# Supplementary material for: DNA barcoding reveals cryptic diversity in the underestimated genus Triplophysa (Cypriniformes: Cobitidae, Nemacheilinae) from the northeastern Qinghai-Tibet Plateau
Source: BMC Evol Biol. 2020 Nov 12;20:151. doi: 10.1186/s12862-020-01718-0 (PMC7663858; doi:10.1186/s12862-020-01718-0)
Supplement: Supplementary file 1 — Additional file 1. Checklist for plateau loach, including their distribution and GenBank accession numbers. [file 12862_2020_1718_MOESM1_ESM.xlsx]

## Sheet: single
Sample ID	Species	Institution Storing	Museum ID	Country	Province	Region	Sector	Latitude	Longitude	Elevation	Genbank Accession Number
Triplophysa bleekeri-003	Triplophysa bleekeri	Gansu Fisheries Research Institute	G0197	China	Sichuan	Aba	Jiuzhai	N 33° 9.094'	E 104°17.265'	H 2007m	MT264969
Triplophysa bleekeri-004	Triplophysa bleekeri	Gansu Fisheries Research Institute	G0198	China	Sichuan	Aba	Jiuzhai	N 33° 9.094'	E 104°17.265'	H 2007m	MT264969
Triplophysa bleekeri-005	Triplophysa bleekeri	Gansu Fisheries Research Institute	G0199	China	Gansu	Longnan	Kangxian	N 33°26.880'	E 105°24.792'	H 1230m	MT264969
Triplophysa bleekeri-001	Triplophysa bleekeri	Gansu Fisheries Research Institute	G0195	China	Gansu	Longnan	Liangdang	N 33°55.939'	E 106°25.613'	H 1891m	MT264969
Triplophysa bleekeri-002	Triplophysa bleekeri	Gansu Fisheries Research Institute	G0196	China	Gansu	Tianshui	Maiji	N 34°16.897'	E 106° 8.897'	H 1929m	MT264969
Triplophysa dalaica-001	Triplophysa dalaica	Gansu Fisheries Research Institute	G0001	China	Gansu	Pingliang	Chongxin	N 35°10.769'	E 107°02.760'	H 1181m	MT264971
Triplophysa dalaica-002	Triplophysa dalaica	Gansu Fisheries Research Institute	G0002	China	Gansu	Pingliang	Chongxin	N 35°10.769'	E 107°02.760'	H 1181m	MT264971
Triplophysa dalaica-003	Triplophysa dalaica	Gansu Fisheries Research Institute	G0003	China	Gansu	Pingliang	Chongxin	N 35°10.769'	E 107°02.760'	H 1181m	MT264971
Triplophysa dalaica-004	Triplophysa dalaica	Gansu Fisheries Research Institute	G0004	China	Gansu	Pingliang	Chongxin	N 35°10.769'	E 107°02.760'	H 1181m	MT264971
Triplophysa dalaica-005	Triplophysa dalaica	Gansu Fisheries Research Institute	G0005	China	Gansu	Pingliang	Chongxin	N 35°10.769'	E 107°02.760'	H 1181m	MT264974
Triplophysa dalaica-006	Triplophysa dalaica	Gansu Fisheries Research Institute	G0006	China	Gansu	Pingliang	Chongxin	N 35°10.769'	E 107°02.760'	H 1181m	MT264971
Triplophysa dalaica-007	Triplophysa dalaica	Gansu Fisheries Research Institute	G0007	China	Gansu	Pingliang	Chongxin	N 35°10.769'	E 107°02.760'	H 1181m	MT264971
Triplophysa dalaica-008	Triplophysa dalaica	Gansu Fisheries Research Institute	G0008	China	Gansu	Pingliang	Chongxin	N 35°10.769'	E 107°02.760'	H 1181m	MT264971
Triplophysa dalaica-009	Triplophysa dalaica	Gansu Fisheries Research Institute	G0009	China	Gansu	Pingliang	Chongxin	N 35°10.769'	E 107°02.760'	H 1181m	MT264971
Triplophysa dalaica-010	Triplophysa dalaica	Gansu Fisheries Research Institute	G0010	China	Gansu	Pingliang	Chongxin	N 35°10.769'	E 107°02.760'	H 1181m	MT264971
Triplophysa dalaica-011	Triplophysa dalaica	Gansu Fisheries Research Institute	G0011	China	Gansu	Pingliang	Chongxin	N 35°10.769'	E 107°02.760'	H 1181m	MT264971
Triplophysa dalaica-012	Triplophysa dalaica	Gansu Fisheries Research Institute	G0012	China	Gansu	Pingliang	Chongxin	N 35°10.769'	E 107°02.760'	H 1181m	MT264971
Triplophysa dalaica-013	Triplophysa dalaica	Gansu Fisheries Research Institute	G0013	China	Gansu	Pingliang	Chongxin	N 35°10.769'	E 107°02.760'	H 1181m	MT264971
Triplophysa dalaica-014	Triplophysa dalaica	Gansu Fisheries Research Institute	G0014	China	Gansu	Pingliang	Chongxin	N 35°10.769'	E 107°02.760'	H 1181m	MT264971
Triplophysa dalaica-015	Triplophysa dalaica	Gansu Fisheries Research Institute	G0015	China	Gansu	Pingliang	Chongxin	N 35°10.769'	E 107°02.760'	H 1181m	MT264971
Triplophysa dalaica-016	Triplophysa dalaica	Gansu Fisheries Research Institute	G0016	China	Gansu	Pingliang	Chongxin	N 35°10.769'	E 107°02.760'	H 1181m	MT264971
Triplophysa dalaica-017	Triplophysa dalaica	Gansu Fisheries Research Institute	G0017	China	Gansu	Pingliang	Chongxin	N 35°10.769'	E 107°02.760'	H 1181m	MT264971
Triplophysa dalaica-018	Triplophysa dalaica	Gansu Fisheries Research Institute	G0018	China	Gansu	Pingliang	Chongxin	N 35°10.769'	E 107°02.760'	H 1181m	MT264971
Triplophysa dalaica-019	Triplophysa dalaica	Gansu Fisheries Research Institute	G0019	China	Gansu	Pingliang	Chongxin	N 35°10.769'	E 107°02.760'	H 1181m	MT264971
Triplophysa dalaica-020	Triplophysa dalaica	Gansu Fisheries Research Institute	G0020	China	Gansu	Pingliang	Chongxin	N 35°10.769'	E 107°02.760'	H 1181m	MT264971
Triplophysa dalaica-021	Triplophysa dalaica	Gansu Fisheries Research Institute	G0021	China	Gansu	Pingliang	Chongxin	N 35°10.769'	E 107°02.760'	H 1181m	MT264971
Triplophysa dalaica-022	Triplophysa dalaica	Gansu Fisheries Research Institute	G0022	China	Gansu	Pingliang	Chongxin	N 35°10.769'	E 107°02.760'	H 1181m	MT264971
Triplophysa dalaica-023	Triplophysa dalaica	Gansu Fisheries Research Institute	G0023	China	Gansu	Pingliang	Chongxin	N 35°10.769'	E 107°02.760'	H 1181m	MT264971
Triplophysa dalaica-049	Triplophysa dalaica	Gansu Fisheries Research Institute	G0024	China	Gansu	Qingyang	Heshui	N 35°51.116'	E 108°15.081'	H 1140m	MT264975
Triplophysa dalaica-053	Triplophysa dalaica	Gansu Fisheries Research Institute	G0025	China	Gansu	Qingyang	Heshui	N 35°51.116'	E 108°15.081'	H 1140m	MT264971
Triplophysa dalaica-047	Triplophysa dalaica	Gansu Fisheries Research Institute	G0026	China	Gansu	Qingyang	Heshui	N 36°12.741'	E 108°29.775'	H 1178m	MT264971
Triplophysa dalaica-035	Triplophysa dalaica	Gansu Fisheries Research Institute	G0027	China	Gansu	Qingyang	Huachi	N 36°14.727'	E 108°27.542'	H 1198m	MT264971
Triplophysa dalaica-031	Triplophysa dalaica	Gansu Fisheries Research Institute	G0028	China	Gansu	Qingyang	Huachi	N 36°23.554'	E 108°10.182'	H 1405m	MT264971
Triplophysa dalaica-032	Triplophysa dalaica	Gansu Fisheries Research Institute	G0029	China	Gansu	Qingyang	Huachi	N 36°23.554'	E 108°10.182'	H 1405m	MT264971
Triplophysa dalaica-024	Triplophysa dalaica	Gansu Fisheries Research Institute	G0030	China	Gansu	Pingliang	Huating	N 35°18.599'	E 106°36.832'	H 1535m	MT264971
Triplophysa dalaica-025	Triplophysa dalaica	Gansu Fisheries Research Institute	G0031	China	Gansu	Pingliang	Huating	N 35°18.599'	E 106°36.832'	H 1535m	MT264976
Triplophysa dalaica-026	Triplophysa dalaica	Gansu Fisheries Research Institute	G0032	China	Gansu	Pingliang	Huating	N 35°18.599'	E 106°36.832'	H 1535m	MT264971
Triplophysa dalaica-027	Triplophysa dalaica	Gansu Fisheries Research Institute	G0033	China	Gansu	Pingliang	Huating	N 35°18.599'	E 106°36.832'	H 1535m	MT264971
Triplophysa dalaica-028	Triplophysa dalaica	Gansu Fisheries Research Institute	G0034	China	Gansu	Pingliang	Huating	N 35°18.599'	E 106°36.832'	H 1535m	MT264971
Triplophysa dalaica-029	Triplophysa dalaica	Gansu Fisheries Research Institute	G0035	China	Gansu	Pingliang	Huating	N 35°18.599'	E 106°36.832'	H 1535m	MT264971
Triplophysa dalaica-030	Triplophysa dalaica	Gansu Fisheries Research Institute	G0036	China	Gansu	Pingliang	Huating	N 35°18.599'	E 106°36.832'	H 1535m	MT264971
Triplophysa dalaica-043	Triplophysa dalaica	Gansu Fisheries Research Institute	G0037	China	Gansu	Pingliang	Huating	N 35°18.599'	E 106°36.832'	H 1535m	MT264971
Triplophysa dalaica-044	Triplophysa dalaica	Gansu Fisheries Research Institute	G0038	China	Gansu	Pingliang	Huating	N 35°18.599'	E 106°36.832'	H 1535m	MT264976
Triplophysa dalaica-045	Triplophysa dalaica	Gansu Fisheries Research Institute	G0039	China	Gansu	Pingliang	Huating	N 35°18.599'	E 106°36.832'	H 1535m	MT264976
Triplophysa dalaica-050	Triplophysa dalaica	Gansu Fisheries Research Institute	G0040	China	Gansu	Pingliang	Huating	N 35°18.599'	E 106°36.832'	H 1535m	MT264971
Triplophysa dalaica-046	Triplophysa dalaica	Gansu Fisheries Research Institute	G0041	China	Gansu	Pingliang	Jingning	N 35°24.847'	E 105°44.443'	H 1601m	MT264972
Triplophysa dalaica-042	Triplophysa dalaica	Gansu Fisheries Research Institute	G0042	China	Gansu	Pingliang	Kongtong	N 35°38.904'	E 106°30.453'	H 1553m	MT264971
Triplophysa dalaica-033	Triplophysa dalaica	Gansu Fisheries Research Institute	G0043	China	Gansu	Qingyang	Ningxian	N 35°20.947'	E 107°44.482'	H 938m	MT264974
Triplophysa dalaica-034	Triplophysa dalaica	Gansu Fisheries Research Institute	G0044	China	Gansu	Qingyang	Ningxian	N 35°20.947'	E 107°44.482'	H 938m	MT264972
Triplophysa dalaica-041	Triplophysa dalaica	Gansu Fisheries Research Institute	G0045	China	Gansu	Qingyang	Xifeng	N 35°25.872'	E 107°40.397'	H 990m	MT264973
Triplophysa dalaica-036	Triplophysa dalaica	Gansu Fisheries Research Institute	G0046	China	Gansu	Qingyang	Zhengning	N 35°26.391'	E 108°24.442'	H 1172m	MT264971
Triplophysa dalaica-037	Triplophysa dalaica	Gansu Fisheries Research Institute	G0047	China	Gansu	Qingyang	Zhengning	N 35°26.391'	E 108°24.442'	H 1172m	MT264972
Triplophysa dalaica-048	Triplophysa dalaica	Gansu Fisheries Research Institute	G0048	China	Gansu	Qingyang	Zhengning	N 35°26.391'	E 108°24.442'	H 1172m	MT264978
Triplophysa dalaica-051	Triplophysa dalaica	Gansu Fisheries Research Institute	G0049	China	Gansu	Qingyang	Zhengning	N 35°26.391'	E 108°24.442'	H 1172m	MT264971
Triplophysa dalaica-052	Triplophysa dalaica	Gansu Fisheries Research Institute	G0050	China	Gansu	Qingyang	Zhengning	N 35°26.391'	E 108°24.442'	H 1172m	MT264979
Triplophysa dalaica-038	Triplophysa dalaica	Gansu Fisheries Research Institute	G0051	China	Gansu	Qingyang	Zhenyuan	N 35°44.138'	E 107°06.320'	H 1195m	MT264977
Triplophysa dalaica-039	Triplophysa dalaica	Gansu Fisheries Research Institute	G0052	China	Gansu	Qingyang	Zhenyuan	N 35°44.138'	E 107°06.320'	H 1195m	MT264971
Triplophysa dalaica-040	Triplophysa dalaica	Gansu Fisheries Research Institute	G0053	China	Gansu	Qingyang	Zhenyuan	N 35°44.138'	E 107°06.320'	H 1195m	MT264971
Triplophysa dalaica-054	Triplophysa dalaica	Gansu Fisheries Research Institute	G0054	China	Gansu	Qingyang	Zhenyuan	N 35°44.138'	E 107°06.320'	H 1195m	MT264978
Triplophysa dalaica-055	Triplophysa dalaica	Gansu Fisheries Research Institute	G0055	China	Gansu	Qingyang	Zhenyuan	N 35°44.138'	E 107°06.320'	H 1195m	MT264979
Triplophysa hsutschouensis-021	Triplophysa hsutschouensis	Gansu Fisheries Research Institute	G0916	China	Gansu	Wuwei	Gulang	N 37°22.566'	E 102°55.645'	H 2273m	MT271363
Triplophysa hsutschouensis-022	Triplophysa hsutschouensis	Gansu Fisheries Research Institute	G0917	China	Gansu	Wuwei	Gulang	N 37°22.566'	E 102°55.645'	H 2273m	MT271364
Triplophysa hsutschouensis-035	Triplophysa hsutschouensis	Gansu Fisheries Research Institute	G0930	China	Gansu	Wuwei	Gulang	N 37°22.566'	E 102°55.645'	H 2273m	MT271364
Triplophysa hsutschouensis-030	Triplophysa hsutschouensis	Gansu Fisheries Research Institute	G0925	China	Gansu	Wuwei	Liangzhou	N 37°55.112'	E 102°13.146'	H 2024m	MT271364
Triplophysa hsutschouensis-001	Triplophysa hsutschouensis	Gansu Fisheries Research Institute	G0896	China	Gansu	Zhangye	Linze	N 39°08.376'	E 100°23.839'	H 1412m	MT271364
Triplophysa hsutschouensis-002	Triplophysa hsutschouensis	Gansu Fisheries Research Institute	G0897	China	Gansu	Zhangye	Linze	N 39°08.376'	E 100°23.839'	H 1412m	MT271365
Triplophysa hsutschouensis-003	Triplophysa hsutschouensis	Gansu Fisheries Research Institute	G0898	China	Gansu	Zhangye	Linze	N 39°08.376'	E 100°23.839'	H 1412m	MT271366
Triplophysa hsutschouensis-004	Triplophysa hsutschouensis	Gansu Fisheries Research Institute	G0899	China	Gansu	Zhangye	Linze	N 39°08.376'	E 100°23.839'	H 1412m	MT271364
Triplophysa hsutschouensis-005	Triplophysa hsutschouensis	Gansu Fisheries Research Institute	G0900	China	Gansu	Zhangye	Linze	N 39°08.376'	E 100°23.839'	H 1412m	MT271366
Triplophysa hsutschouensis-020	Triplophysa hsutschouensis	Gansu Fisheries Research Institute	G0915	China	Gansu	Zhangye	Linze	N 39°08.376'	E 100°23.839'	H 1412m	MT271364
Triplophysa hsutschouensis-028	Triplophysa hsutschouensis	Gansu Fisheries Research Institute	G0923	China	Gansu	Wuwei	Maozang	N 37°30.962'	E 102°25.906'	H 2626m	MT271364
Triplophysa hsutschouensis-044	Triplophysa hsutschouensis	Gansu Fisheries Research Institute	G0939	China	Gansu	Wuwei	Maozang	N 37°30.962'	E 102°25.906'	H 2626m	MT271366
Triplophysa hsutschouensis-029	Triplophysa hsutschouensis	Gansu Fisheries Research Institute	G0924	China	Gansu	Jinchang	Yongchang	N 38° 2.807'	E 101°57.428'	H 2465m	MT271364
Triplophysa hsutschouensis-039	Triplophysa hsutschouensis	Gansu Fisheries Research Institute	G0934	China	Gansu	Jinchang	Yongchang	N 38° 2.807'	E 101°57.428'	H 2465m	MT271368
Triplophysa hsutschouensis-040	Triplophysa hsutschouensis	Gansu Fisheries Research Institute	G0935	China	Gansu	Jinchang	Yongchang	N 38° 2.807'	E 101°57.428'	H 2465m	MT271364
Triplophysa hsutschouensis-041	Triplophysa hsutschouensis	Gansu Fisheries Research Institute	G0936	China	Gansu	Jinchang	Yongchang	N 38° 2.807'	E 101°57.428'	H 2465m	MT271369
Triplophysa hsutschouensis-045	Triplophysa hsutschouensis	Gansu Fisheries Research Institute	G0940	China	Gansu	Jinchang	Yongchang	N 38° 2.807'	E 101°57.428'	H 2465m	MT271364
Triplophysa hsutschouensis-023	Triplophysa hsutschouensis	Gansu Fisheries Research Institute	G0918	China	Gansu	Jinchang	Yongchang	N 38° 3.592'	E 101°23.607'	H 2835m	MT271369
Triplophysa hsutschouensis-024	Triplophysa hsutschouensis	Gansu Fisheries Research Institute	G0919	China	Gansu	Jinchang	Yongchang	N 38° 3.592'	E 101°23.607'	H 2835m	MT271369
Triplophysa hsutschouensis-025	Triplophysa hsutschouensis	Gansu Fisheries Research Institute	G0920	China	Gansu	Jinchang	Yongchang	N 38° 3.592'	E 101°23.607'	H 2835m	MT271364
Triplophysa hsutschouensis-026	Triplophysa hsutschouensis	Gansu Fisheries Research Institute	G0921	China	Gansu	Jinchang	Yongchang	N 38° 3.592'	E 101°23.607'	H 2835m	MT271369
Triplophysa hsutschouensis-027	Triplophysa hsutschouensis	Gansu Fisheries Research Institute	G0922	China	Gansu	Jinchang	Yongchang	N 38° 3.592'	E 101°23.607'	H 2835m	MT271364
Triplophysa hsutschouensis-036	Triplophysa hsutschouensis	Gansu Fisheries Research Institute	G0931	China	Gansu	Jinchang	Yongchang	N 38° 3.592'	E 101°23.607'	H 2835m	MT271369
Triplophysa hsutschouensis-037	Triplophysa hsutschouensis	Gansu Fisheries Research Institute	G0932	China	Gansu	Jinchang	Yongchang	N 38° 3.592'	E 101°23.607'	H 2835m	MT271366
Triplophysa hsutschouensis-038	Triplophysa hsutschouensis	Gansu Fisheries Research Institute	G0933	China	Gansu	Jinchang	Yongchang	N 38° 3.592'	E 101°23.607'	H 2835m	MT271366
Triplophysa hsutschouensis-031	Triplophysa hsutschouensis	Gansu Fisheries Research Institute	G0926	China	Gansu	Wuwei	Yongchang	N 38°19.887'	E 102° 1.632'	H 1827m	MT271369
Triplophysa hsutschouensis-032	Triplophysa hsutschouensis	Gansu Fisheries Research Institute	G0927	China	Gansu	Wuwei	Yongchang	N 38°19.887'	E 102° 1.632'	H 1827m	MT271369
Triplophysa hsutschouensis-033	Triplophysa hsutschouensis	Gansu Fisheries Research Institute	G0928	China	Gansu	Wuwei	Yongchang	N 38°19.887'	E 102° 1.632'	H 1827m	MT271369
Triplophysa hsutschouensis-034	Triplophysa hsutschouensis	Gansu Fisheries Research Institute	G0929	China	Gansu	Jinchang	Yongchang	N 38°19.887'	E 102° 1.632'	H 1827m	MT271369
Triplophysa hsutschouensis-042	Triplophysa hsutschouensis	Gansu Fisheries Research Institute	G0937	China	Gansu	Wuwei	Yongchang	N 38°19.887'	E 102° 1.632'	H 1827m	MT271364
Triplophysa hsutschouensis-043	Triplophysa hsutschouensis	Gansu Fisheries Research Institute	G0938	China	Gansu	Jinchang	Yongchang	N 38°19.887'	E 102° 1.632'	H 1827m	MT271369
Triplophysa hsutschouensis-046	Triplophysa hsutschouensis	Gansu Fisheries Research Institute	G0941	China	Gansu	Jinchang	Yongchang	N 38°19.887'	E 102° 1.632'	H 1827m	MT271369
Triplophysa hsutschouensis-006	Triplophysa hsutschouensis	Gansu Fisheries Research Institute	G0901	China	Gansu	Jiuquan	Yumen	N 39°52.098'	E 96°44.983'	H 2054m	MT271367
Triplophysa hsutschouensis-007	Triplophysa hsutschouensis	Gansu Fisheries Research Institute	G0902	China	Gansu	Jiuquan	Yumen	N 39°52.098'	E 96°44.983'	H 2054m	MT271367
Triplophysa hsutschouensis-008	Triplophysa hsutschouensis	Gansu Fisheries Research Institute	G0903	China	Gansu	Jiuquan	Yumen	N 39°52.098'	E 96°44.983'	H 2054m	MT271366
Triplophysa hsutschouensis-009	Triplophysa hsutschouensis	Gansu Fisheries Research Institute	G0904	China	Gansu	Jiuquan	Yumen	N 39°52.098'	E 96°44.983'	H 2054m	MT271366
Triplophysa hsutschouensis-010	Triplophysa hsutschouensis	Gansu Fisheries Research Institute	G0905	China	Gansu	Jiuquan	Yumen	N 39°52.098'	E 96°44.983'	H 2054m	MT271366
Triplophysa hsutschouensis-011	Triplophysa hsutschouensis	Gansu Fisheries Research Institute	G0906	China	Gansu	Jiuquan	Yumen	N 39°52.098'	E 96°44.983'	H 2054m	MT271366
Triplophysa hsutschouensis-012	Triplophysa hsutschouensis	Gansu Fisheries Research Institute	G0907	China	Gansu	Jiuquan	Yumen	N 39°52.098'	E 96°44.983'	H 2054m	MT271369
Triplophysa hsutschouensis-013	Triplophysa hsutschouensis	Gansu Fisheries Research Institute	G0908	China	Gansu	Jiuquan	Yumen	N 39°52.098'	E 96°44.983'	H 2054m	MT271369
Triplophysa hsutschouensis-014	Triplophysa hsutschouensis	Gansu Fisheries Research Institute	G0909	China	Gansu	Jiuquan	Yumen	N 39°52.098'	E 96°44.983'	H 2054m	MT271369
Triplophysa hsutschouensis-015	Triplophysa hsutschouensis	Gansu Fisheries Research Institute	G0910	China	Gansu	Jiuquan	Yumen	N 39°52.098'	E 96°44.983'	H 2054m	MT271369
Triplophysa hsutschouensis-018	Triplophysa hsutschouensis	Gansu Fisheries Research Institute	G0913	China	Gansu	Jiuquan	Yumen	N 39°52.098'	E 96°44.983'	H 2054m	MT271369
Triplophysa hsutschouensis-019	Triplophysa hsutschouensis	Gansu Fisheries Research Institute	G0914	China	Gansu	Jiuquan	Yumen	N 39°52.098'	E 96°44.983'	H 2054m	MT271369
Triplophysa hsutschouensis-016	Triplophysa hsutschouensis	Gansu Fisheries Research Institute	G0911	China	Gansu	Jiuquan	Yumen	N 40°12.429'	E 97°29.037'	H 1424m	MT271369
Triplophysa hsutschouensis-017	Triplophysa hsutschouensis	Gansu Fisheries Research Institute	G0912	China	Gansu	Jiuquan	Yumen	N 40°12.429'	E 97°29.037'	H 1424m	MT271370
Triplophysa leptosoma-004	Triplophysa leptosoma	Gansu Fisheries Research Institute	GS0439	China	Qinghai	Haibei	Qilian	N 38°42.150'	E 98° 0.669'	H 3651m	MT271372
Triplophysa leptosoma-006	Triplophysa leptosoma	Gansu Fisheries Research Institute	GS0441	China	Qinghai	Haibei	Qilian	N 38°42.150'	E 98° 0.669'	H 3651m	MT271372
Triplophysa leptosoma-001	Triplophysa leptosoma	Gansu Fisheries Research Institute	GS0436	China	Gansu	Jiuquan	Yumen	N 39°52.098'	E 96°44.983'	H 2054m	MT271371
Triplophysa leptosoma-002	Triplophysa leptosoma	Gansu Fisheries Research Institute	GS0437	China	Gansu	Jiuquan	Yumen	N 39°52.098'	E 96°44.983'	H 2054m	MT271373
Triplophysa leptosoma-003	Triplophysa leptosoma	Gansu Fisheries Research Institute	GS0438	China	Gansu	Jiuquan	Yumen	N 39°52.098'	E 96°44.983'	H 2054m	MT271373
Triplophysa leptosoma-005	Triplophysa leptosoma	Gansu Fisheries Research Institute	GS0440	China	Gansu	Jiuquan	Yumen	N 39°52.098'	E 96°44.983'	H 2054m	MT271373
Triplophysa leptosoma-007	Triplophysa leptosoma	Gansu Fisheries Research Institute	GS0442	China	Gansu	Jiuquan	Yumen	N 39°52.098'	E 96°44.983'	H 2054m	MT271373
Triplophysa minxianensisi-001	Triplophysa minxianensisi	Gansu Fisheries Research Institute	G0942	China	Gansu	Lanzhou	Honggu	N 36°22.596'	E 102°51.085'	H 2102m	MT271374
Triplophysa minxianensisi-014	Triplophysa minxianensisi	Gansu Fisheries Research Institute	G0955	China	Gansu	Qingyang	Huachi	N 36°23.554'	E 108°10.182'	H 1405m	MT271374
Triplophysa minxianensisi-218	Triplophysa minxianensisi	Gansu Fisheries Research Institute	GS0160	China	Gansu	Longnan	Lixian	N 33°49.878'	E 104°52.176'	H 1358m	MT271374
Triplophysa minxianensisi-148	Triplophysa minxianensisi	Gansu Fisheries Research Institute	GS0090	China	Gansu	Dingxi	Longxi	N 34°52.447'	E 104°43.260'	H 1610m	MT271445
Triplophysa minxianensisi-212	Triplophysa minxianensisi	Gansu Fisheries Research Institute	GS0154	China	Gansu	Dingxi	Longxi	N 34°52.447'	E 104°43.260'	H 1610m	MT271374
Triplophysa minxianensisi-213	Triplophysa minxianensisi	Gansu Fisheries Research Institute	GS0155	China	Gansu	Dingxi	Longxi	N 34°52.447'	E 104°43.260'	H 1610m	MT271374
Triplophysa minxianensisi-078	Triplophysa minxianensisi	Gansu Fisheries Research Institute	GS0020	China	Gansu	Tianshui	Maiji	N 34°24.065'	E 105°59.502'	H 1319m	MT271374
Triplophysa minxianensisi-079	Triplophysa minxianensisi	Gansu Fisheries Research Institute	GS0021	China	Gansu	Tianshui	Maiji	N 34°24.065'	E 105°59.502'	H 1319m	MT271374
Triplophysa minxianensisi-080	Triplophysa minxianensisi	Gansu Fisheries Research Institute	GS0022	China	Gansu	Tianshui	Maiji	N 34°24.065'	E 105°59.502'	H 1319m	MT271374
Triplophysa minxianensisi-237	Triplophysa minxianensisi	Gansu Fisheries Research Institute	GS0179	China	Gansu	Tianshui	Maiji	N 34°24.065'	E 105°59.502'	H 1319m	MT271374
Triplophysa minxianensisi-003	Triplophysa minxianensisi	Gansu Fisheries Research Institute	G0944	China	Gansu	Dingxi	Minxian	N 34°24.162'	E 104°04.066'	H 2345m	MT271374
Triplophysa minxianensisi-004	Triplophysa minxianensisi	Gansu Fisheries Research Institute	G0945	China	Gansu	Dingxi	Minxian	N 34°24.162'	E 104°04.066'	H 2345m	MT271374
Triplophysa minxianensisi-024	Triplophysa minxianensisi	Gansu Fisheries Research Institute	G0965	China	Gansu	Dingxi	Minxian	N 34°24.162'	E 104°04.066'	H 2345m	MT271374
Triplophysa minxianensisi-025	Triplophysa minxianensisi	Gansu Fisheries Research Institute	G0966	China	Gansu	Tianshui	Minxian	N 34°24.162'	E 104°04.066'	H 2345m	MT271374
Triplophysa minxianensisi-198	Triplophysa minxianensisi	Gansu Fisheries Research Institute	GS0140	China	Gansu	Dingxi	Minxian	N 34°24.162'	E 104°04.066'	H 2345m	MT271374
Triplophysa minxianensisi-091	Triplophysa minxianensisi	Gansu Fisheries Research Institute	GS0033	China	Gansu	Tianshui	Qingshui	N 34°36.559'	E 105°57.625'	H 1136m	MT271374
Triplophysa minxianensisi-092	Triplophysa minxianensisi	Gansu Fisheries Research Institute	GS0034	China	Gansu	Tianshui	Qingshui	N 34°36.559'	E 105°57.625'	H 1136m	MT271374
Triplophysa minxianensisi-093	Triplophysa minxianensisi	Gansu Fisheries Research Institute	GS0035	China	Gansu	Tianshui	Qingshui	N 34°36.559'	E 105°57.625'	H 1136m	MT271374
Triplophysa minxianensisi-094	Triplophysa minxianensisi	Gansu Fisheries Research Institute	GS0036	China	Gansu	Tianshui	Qingshui	N 34°36.559'	E 105°57.625'	H 1136m	MT271374
Triplophysa minxianensisi-095	Triplophysa minxianensisi	Gansu Fisheries Research Institute	GS0037	China	Gansu	Tianshui	Qingshui	N 34°36.559'	E 105°57.625'	H 1136m	MT271374
Triplophysa minxianensisi-096	Triplophysa minxianensisi	Gansu Fisheries Research Institute	GS0038	China	Gansu	Tianshui	Qingshui	N 34°36.559'	E 105°57.625'	H 1136m	MT271374
Triplophysa minxianensisi-097	Triplophysa minxianensisi	Gansu Fisheries Research Institute	GS0039	China	Gansu	Tianshui	Qingshui	N 34°36.559'	E 105°57.625'	H 1136m	MT271388
Triplophysa minxianensisi-098	Triplophysa minxianensisi	Gansu Fisheries Research Institute	GS0040	China	Gansu	Tianshui	Qingshui	N 34°36.559'	E 105°57.625'	H 1136m	MT271374
Triplophysa minxianensisi-099	Triplophysa minxianensisi	Gansu Fisheries Research Institute	GS0041	China	Gansu	Tianshui	Qingshui	N 34°36.559'	E 105°57.625'	H 1136m	MT271374
Triplophysa minxianensisi-100	Triplophysa minxianensisi	Gansu Fisheries Research Institute	GS0042	China	Gansu	Tianshui	Qingshui	N 34°36.559'	E 105°57.625'	H 1136m	MT271374
Triplophysa minxianensisi-112	Triplophysa minxianensisi	Gansu Fisheries Research Institute	GS0054	China	Gansu	Tianshui	Qingshui	N 34°36.559'	E 105°57.625'	H 1136m	MT271374
Triplophysa minxianensisi-113	Triplophysa minxianensisi	Gansu Fisheries Research Institute	GS0055	China	Gansu	Tianshui	Qingshui	N 34°36.559'	E 105°57.625'	H 1136m	MT271374
Triplophysa minxianensisi-114	Triplophysa minxianensisi	Gansu Fisheries Research Institute	GS0056	China	Gansu	Tianshui	Qingshui	N 34°36.559'	E 105°57.625'	H 1136m	MT271374
Triplophysa minxianensisi-115	Triplophysa minxianensisi	Gansu Fisheries Research Institute	GS0057	China	Gansu	Tianshui	Qingshui	N 34°36.559'	E 105°57.625'	H 1136m	MT271374
Triplophysa minxianensisi-116	Triplophysa minxianensisi	Gansu Fisheries Research Institute	GS0058	China	Gansu	Tianshui	Qingshui	N 34°36.559'	E 105°57.625'	H 1136m	MT271374
Triplophysa minxianensisi-118	Triplophysa minxianensisi	Gansu Fisheries Research Institute	GS0060	China	Gansu	Tianshui	Qingshui	N 34°36.559'	E 105°57.625'	H 1136m	MT271374
Triplophysa minxianensisi-119	Triplophysa minxianensisi	Gansu Fisheries Research Institute	GS0061	China	Gansu	Tianshui	Qingshui	N 34°36.559'	E 105°57.625'	H 1136m	MT271374
Triplophysa minxianensisi-120	Triplophysa minxianensisi	Gansu Fisheries Research Institute	GS0062	China	Gansu	Tianshui	Qingshui	N 34°36.559'	E 105°57.625'	H 1136m	MT271374
Triplophysa minxianensisi-238	Triplophysa minxianensisi	Gansu Fisheries Research Institute	GS0180	China	Gansu	Tianshui	Qingshui	N 34°36.559'	E 105°57.625'	H 1136m	MT271374
Triplophysa minxianensisi-245	Triplophysa minxianensisi	Gansu Fisheries Research Institute	GS0187	China	Gansu	Tianshui	Qingshui	N 34°36.559'	E 105°57.625'	H 1136m	MT271374
Triplophysa minxianensisi-015	Triplophysa minxianensisi	Gansu Fisheries Research Institute	G0956	China	Gansu	Tianshui	Qingshui	N 34°47.26'	E 104°11.629'	H 1430m	MT271374
Triplophysa minxianensisi-016	Triplophysa minxianensisi	Gansu Fisheries Research Institute	G0957	China	Gansu	Tianshui	Qingshui	N 34°47.26'	E 104°11.629'	H 1430m	MT271374
Triplophysa minxianensisi-017	Triplophysa minxianensisi	Gansu Fisheries Research Institute	G0958	China	Gansu	Tianshui	Qingshui	N 34°47.26'	E 104°11.629'	H 1430m	MT271374
Triplophysa minxianensisi-018	Triplophysa minxianensisi	Gansu Fisheries Research Institute	G0959	China	Gansu	Tianshui	Qingshui	N 34°47.26'	E 104°11.629'	H 1430m	MT271374
Triplophysa minxianensisi-019	Triplophysa minxianensisi	Gansu Fisheries Research Institute	G0960	China	Gansu	Tianshui	Qingshui	N 34°47.26'	E 104°11.629'	H 1430m	MT271374
Triplophysa minxianensisi-020	Triplophysa minxianensisi	Gansu Fisheries Research Institute	G0961	China	Gansu	Tianshui	Qingshui	N 34°47.26'	E 104°11.629'	H 1430m	MT271374
Triplophysa minxianensisi-021	Triplophysa minxianensisi	Gansu Fisheries Research Institute	G0962	China	Gansu	Tianshui	Qingshui	N 34°47.26'	E 104°11.629'	H 1430m	MT271374
Triplophysa minxianensisi-022	Triplophysa minxianensisi	Gansu Fisheries Research Institute	G0963	China	Gansu	Tianshui	Qingshui	N 34°47.26'	E 104°11.629'	H 1430m	MT271374
Triplophysa minxianensisi-023	Triplophysa minxianensisi	Gansu Fisheries Research Institute	G0964	China	Gansu	Tianshui	Qingshui	N 34°47.26'	E 104°11.629'	H 1430m	MT271376
Triplophysa minxianensisi-155	Triplophysa minxianensisi	Gansu Fisheries Research Institute	GS0097	China	Gansu	Tianshui	Qingshui	N 34°47.26'	E 104°11.629'	H 1430m	MT271376
Triplophysa minxianensisi-157	Triplophysa minxianensisi	Gansu Fisheries Research Institute	GS0099	China	Gansu	Tianshui	Qingshui	N 34°47.26'	E 104°11.629'	H 1430m	MT271376
Triplophysa minxianensisi-158	Triplophysa minxianensisi	Gansu Fisheries Research Institute	GS0100	China	Gansu	Tianshui	Qingshui	N 34°47.26'	E 104°11.629'	H 1430m	MT271374
Triplophysa minxianensisi-159	Triplophysa minxianensisi	Gansu Fisheries Research Institute	GS0101	China	Gansu	Tianshui	Qingshui	N 34°47.26'	E 104°11.629'	H 1430m	MT271374
Triplophysa minxianensisi-160	Triplophysa minxianensisi	Gansu Fisheries Research Institute	GS0102	China	Gansu	Tianshui	Qingshui	N 34°47.26'	E 104°11.629'	H 1430m	MT271374
Triplophysa minxianensisi-161	Triplophysa minxianensisi	Gansu Fisheries Research Institute	GS0103	China	Gansu	Tianshui	Qingshui	N 34°47.26'	E 104°11.629'	H 1430m	MT271374
Triplophysa minxianensisi-063	Triplophysa minxianensisi	Gansu Fisheries Research Institute	GS0005	China	Gansu	Tianshui	Qinzhou	N 34° 7.438'	E 105°35.204'	H 1482m	MT271374
Triplophysa minxianensisi-062	Triplophysa minxianensisi	Gansu Fisheries Research Institute	GS0004	China	Gansu	Tianshui	Qinzhou	N 34°13.369'	E 105°57.765'	H 1417m	MT271374
Triplophysa minxianensisi-179	Triplophysa minxianensisi	Gansu Fisheries Research Institute	GS0121	China	Gansu	Tianshui	Qinzhou	N 34°31.881'	E 105°16.939'	H 1927m	MT271374
Triplophysa minxianensisi-180	Triplophysa minxianensisi	Gansu Fisheries Research Institute	GS0122	China	Gansu	Tianshui	Qinzhou	N 34°31.881'	E 105°16.939'	H 1927m	MT271374
Triplophysa minxianensisi-181	Triplophysa minxianensisi	Gansu Fisheries Research Institute	GS0123	China	Gansu	Tianshui	Qinzhou	N 34°31.881'	E 105°16.939'	H 1927m	MT271374
Triplophysa minxianensisi-182	Triplophysa minxianensisi	Gansu Fisheries Research Institute	GS0124	China	Gansu	Tianshui	Qinzhou	N 34°31.881'	E 105°16.939'	H 1927m	MT271374
Triplophysa minxianensisi-183	Triplophysa minxianensisi	Gansu Fisheries Research Institute	GS0125	China	Gansu	Tianshui	Qinzhou	N 34°31.881'	E 105°16.939'	H 1927m	MT271374
Triplophysa minxianensisi-184	Triplophysa minxianensisi	Gansu Fisheries Research Institute	GS0126	China	Gansu	Tianshui	Qinzhou	N 34°31.881'	E 105°16.939'	H 1927m	MT271374
Triplophysa minxianensisi-185	Triplophysa minxianensisi	Gansu Fisheries Research Institute	GS0127	China	Gansu	Tianshui	Qinzhou	N 34°31.881'	E 105°16.939'	H 1927m	MT271374
Triplophysa minxianensisi-186	Triplophysa minxianensisi	Gansu Fisheries Research Institute	GS0128	China	Gansu	Tianshui	Qinzhou	N 34°31.881'	E 105°16.939'	H 1927m	MT271374
Triplophysa minxianensisi-187	Triplophysa minxianensisi	Gansu Fisheries Research Institute	GS0129	China	Gansu	Tianshui	Qinzhou	N 34°31.881'	E 105°16.939'	H 1927m	MT271374
Triplophysa minxianensisi-188	Triplophysa minxianensisi	Gansu Fisheries Research Institute	GS0130	China	Gansu	Tianshui	Qinzhou	N 34°31.881'	E 105°16.939'	H 1927m	MT271374
Triplophysa minxianensisi-189	Triplophysa minxianensisi	Gansu Fisheries Research Institute	GS0131	China	Gansu	Tianshui	Qinzhou	N 34°31.881'	E 105°16.939'	H 1927m	MT271374
Triplophysa minxianensisi-190	Triplophysa minxianensisi	Gansu Fisheries Research Institute	GS0132	China	Gansu	Tianshui	Qinzhou	N 34°31.881'	E 105°16.939'	H 1927m	MT271374
Triplophysa minxianensisi-191	Triplophysa minxianensisi	Gansu Fisheries Research Institute	GS0133	China	Gansu	Tianshui	Qinzhou	N 34°31.881'	E 105°16.939'	H 1927m	MT271374
Triplophysa minxianensisi-199	Triplophysa minxianensisi	Gansu Fisheries Research Institute	GS0141	China	Gansu	Tianshui	Qinzhou	N 34°31.881'	E 105°16.939'	H 1927m	MT271374
Triplophysa minxianensisi-200	Triplophysa minxianensisi	Gansu Fisheries Research Institute	GS0142	China	Gansu	Tianshui	Qinzhou	N 34°31.881'	E 105°16.939'	H 1927m	MT271374
Triplophysa minxianensisi-214	Triplophysa minxianensisi	Gansu Fisheries Research Institute	GS0156	China	Gansu	Tianshui	Qinzhou	N 34°31.881'	E 105°16.939'	H 1927m	MT271374
Triplophysa minxianensisi-222	Triplophysa minxianensisi	Gansu Fisheries Research Institute	GS0164	China	Gansu	Tianshui	Qinzhou	N 34°31.881'	E 105°16.939'	H 1927m	MT271374
Triplophysa minxianensisi-223	Triplophysa minxianensisi	Gansu Fisheries Research Institute	GS0165	China	Gansu	Tianshui	Qinzhou	N 34°31.881'	E 105°16.939'	H 1927m	MT271374
Triplophysa minxianensisi-224	Triplophysa minxianensisi	Gansu Fisheries Research Institute	GS0166	China	Gansu	Tianshui	Qinzhou	N 34°31.881'	E 105°16.939'	H 1927m	MT271374
Triplophysa minxianensisi-225	Triplophysa minxianensisi	Gansu Fisheries Research Institute	GS0167	China	Gansu	Tianshui	Qinzhou	N 34°31.881'	E 105°16.939'	H 1927m	MT271374
Triplophysa minxianensisi-226	Triplophysa minxianensisi	Gansu Fisheries Research Institute	GS0168	China	Gansu	Tianshui	Qinzhou	N 34°31.881'	E 105°16.939'	H 1927m	MT271374
Triplophysa minxianensisi-227	Triplophysa minxianensisi	Gansu Fisheries Research Institute	GS0169	China	Gansu	Tianshui	Qinzhou	N 34°31.881'	E 105°16.939'	H 1927m	MT271374
Triplophysa minxianensisi-228	Triplophysa minxianensisi	Gansu Fisheries Research Institute	GS0170	China	Gansu	Tianshui	Qinzhou	N 34°31.881'	E 105°16.939'	H 1927m	MT271374
Triplophysa minxianensisi-253	Triplophysa minxianensisi	Gansu Fisheries Research Institute	GS0195	China	Gansu	Tianshui	Qinzhou	N 34°31.881'	E 105°16.939'	H 1927m	MT271374
Triplophysa minxianensisi-006	Triplophysa minxianensisi	Gansu Fisheries Research Institute	G0947	China	Gansu	Tianshui	Qinzhou	N 34°34.733'	E 105°10.864'	H 2100m	MT271374
Triplophysa minxianensisi-007	Triplophysa minxianensisi	Gansu Fisheries Research Institute	G0948	China	Gansu	Tianshui	Qinzhou	N 34°34.733'	E 105°10.864'	H 2100m	MT271374
Triplophysa minxianensisi-008	Triplophysa minxianensisi	Gansu Fisheries Research Institute	G0949	China	Gansu	Tianshui	Qinzhou	N 34°34.733'	E 105°10.864'	H 2100m	MT271374
Triplophysa minxianensisi-009	Triplophysa minxianensisi	Gansu Fisheries Research Institute	G0950	China	Gansu	Tianshui	Qinzhou	N 34°34.733'	E 105°10.864'	H 2100m	MT271374
Triplophysa minxianensisi-027	Triplophysa minxianensisi	Gansu Fisheries Research Institute	G0968	China	Gansu	Tianshui	Qinzhou	N 34°34.733'	E 105°10.864'	H 2100m	MT271374
Triplophysa minxianensisi-028	Triplophysa minxianensisi	Gansu Fisheries Research Institute	G0969	China	Gansu	Tianshui	Qinzhou	N 34°34.733'	E 105°10.864'	H 2100m	MT271374
Triplophysa minxianensisi-029	Triplophysa minxianensisi	Gansu Fisheries Research Institute	G0970	China	Gansu	Tianshui	Qinzhou	N 34°34.733'	E 105°10.864'	H 2100m	MT271374
Triplophysa minxianensisi-030	Triplophysa minxianensisi	Gansu Fisheries Research Institute	G0971	China	Gansu	Tianshui	Qinzhou	N 34°34.733'	E 105°10.864'	H 2100m	MT271374
Triplophysa minxianensisi-031	Triplophysa minxianensisi	Gansu Fisheries Research Institute	G0972	China	Gansu	Tianshui	Qinzhou	N 34°34.733'	E 105°10.864'	H 2100m	MT271374
Triplophysa minxianensisi-032	Triplophysa minxianensisi	Gansu Fisheries Research Institute	G0973	China	Gansu	Tianshui	Qinzhou	N 34°34.733'	E 105°10.864'	H 2100m	MT271374
Triplophysa minxianensisi-033	Triplophysa minxianensisi	Gansu Fisheries Research Institute	G0974	China	Gansu	Tianshui	Qinzhou	N 34°34.733'	E 105°10.864'	H 2100m	MT271374
Triplophysa minxianensisi-034	Triplophysa minxianensisi	Gansu Fisheries Research Institute	G0975	China	Gansu	Tianshui	Qinzhou	N 34°34.733'	E 105°10.864'	H 2100m	MT271374
Triplophysa minxianensisi-035	Triplophysa minxianensisi	Gansu Fisheries Research Institute	G0976	China	Gansu	Tianshui	Qinzhou	N 34°34.733'	E 105°10.864'	H 2100m	MT271374
Triplophysa minxianensisi-036	Triplophysa minxianensisi	Gansu Fisheries Research Institute	G0977	China	Gansu	Tianshui	Qinzhou	N 34°34.733'	E 105°10.864'	H 2100m	MT271376
Triplophysa minxianensisi-047	Triplophysa minxianensisi	Gansu Fisheries Research Institute	G0988	China	Gansu	Tianshui	Qinzhou	N 34°34.733'	E 105°10.864'	H 2100m	MT271374
Triplophysa minxianensisi-048	Triplophysa minxianensisi	Gansu Fisheries Research Institute	G0989	China	Gansu	Tianshui	Qinzhou	N 34°34.733'	E 105°10.864'	H 2100m	MT271376
Triplophysa minxianensisi-049	Triplophysa minxianensisi	Gansu Fisheries Research Institute	G0990	China	Gansu	Tianshui	Qinzhou	N 34°34.733'	E 105°10.864'	H 2100m	MT271374
Triplophysa minxianensisi-050	Triplophysa minxianensisi	Gansu Fisheries Research Institute	G0991	China	Gansu	Tianshui	Qinzhou	N 34°34.733'	E 105°10.864'	H 2100m	MT271374
Triplophysa minxianensisi-051	Triplophysa minxianensisi	Gansu Fisheries Research Institute	G0992	China	Gansu	Tianshui	Qinzhou	N 34°34.733'	E 105°10.864'	H 2100m	MT271374
Triplophysa minxianensisi-052	Triplophysa minxianensisi	Gansu Fisheries Research Institute	G0993	China	Gansu	Tianshui	Qinzhou	N 34°34.733'	E 105°10.864'	H 2100m	MT271374
Triplophysa minxianensisi-053	Triplophysa minxianensisi	Gansu Fisheries Research Institute	G0994	China	Gansu	Tianshui	Qinzhou	N 34°34.733'	E 105°10.864'	H 2100m	MT271374
Triplophysa minxianensisi-054	Triplophysa minxianensisi	Gansu Fisheries Research Institute	G0995	China	Gansu	Tianshui	Qinzhou	N 34°34.733'	E 105°10.864'	H 2100m	MT271374
Triplophysa minxianensisi-055	Triplophysa minxianensisi	Gansu Fisheries Research Institute	G0996	China	Gansu	Tianshui	Qinzhou	N 34°34.733'	E 105°10.864'	H 2100m	MT271374
Triplophysa minxianensisi-056	Triplophysa minxianensisi	Gansu Fisheries Research Institute	G0997	China	Gansu	Tianshui	Qinzhou	N 34°34.733'	E 105°10.864'	H 2100m	MT271374
Triplophysa minxianensisi-057	Triplophysa minxianensisi	Gansu Fisheries Research Institute	G0998	China	Gansu	Tianshui	Qinzhou	N 34°34.733'	E 105°10.864'	H 2100m	MT271374
Triplophysa minxianensisi-058	Triplophysa minxianensisi	Gansu Fisheries Research Institute	G0999	China	Gansu	Tianshui	Qinzhou	N 34°34.733'	E 105°10.864'	H 2100m	MT271374
Triplophysa minxianensisi-059	Triplophysa minxianensisi	Gansu Fisheries Research Institute	GS0001	China	Gansu	Tianshui	Qinzhou	N 34°34.733'	E 105°10.864'	H 2100m	MT271374
Triplophysa minxianensisi-060	Triplophysa minxianensisi	Gansu Fisheries Research Institute	GS0002	China	Gansu	Tianshui	Qinzhou	N 34°34.733'	E 105°10.864'	H 2100m	MT271374
Triplophysa minxianensisi-061	Triplophysa minxianensisi	Gansu Fisheries Research Institute	GS0003	China	Gansu	Tianshui	Qinzhou	N 34°34.733'	E 105°10.864'	H 2100m	MT271374
Triplophysa minxianensisi-192	Triplophysa minxianensisi	Gansu Fisheries Research Institute	GS0134	China	Gansu	Tianshui	Qinzhou	N 34°34.733'	E 105°10.864'	H 2100m	MT271374
Triplophysa minxianensisi-193	Triplophysa minxianensisi	Gansu Fisheries Research Institute	GS0135	China	Gansu	Tianshui	Qinzhou	N 34°34.733'	E 105°10.864'	H 2100m	MT271374
Triplophysa minxianensisi-194	Triplophysa minxianensisi	Gansu Fisheries Research Institute	GS0136	China	Gansu	Tianshui	Qinzhou	N 34°34.733'	E 105°10.864'	H 2100m	MT271374
Triplophysa minxianensisi-195	Triplophysa minxianensisi	Gansu Fisheries Research Institute	GS0137	China	Gansu	Tianshui	Qinzhou	N 34°34.733'	E 105°10.864'	H 2100m	MT271374
Triplophysa minxianensisi-196	Triplophysa minxianensisi	Gansu Fisheries Research Institute	GS0138	China	Gansu	Tianshui	Qinzhou	N 34°34.733'	E 105°10.864'	H 2100m	MT271374
Triplophysa minxianensisi-197	Triplophysa minxianensisi	Gansu Fisheries Research Institute	GS0139	China	Gansu	Tianshui	Qinzhou	N 34°34.733'	E 105°10.864'	H 2100m	MT271376
Triplophysa minxianensisi-201	Triplophysa minxianensisi	Gansu Fisheries Research Institute	GS0143	China	Gansu	Tianshui	Qinzhou	N 34°34.733'	E 105°10.864'	H 2100m	MT271374
Triplophysa minxianensisi-202	Triplophysa minxianensisi	Gansu Fisheries Research Institute	GS0144	China	Gansu	Tianshui	Qinzhou	N 34°34.733'	E 105°10.864'	H 2100m	MT271374
Triplophysa minxianensisi-203	Triplophysa minxianensisi	Gansu Fisheries Research Institute	GS0145	China	Gansu	Tianshui	Qinzhou	N 34°34.733'	E 105°10.864'	H 2100m	MT271374
Triplophysa minxianensisi-204	Triplophysa minxianensisi	Gansu Fisheries Research Institute	GS0146	China	Gansu	Tianshui	Qinzhou	N 34°34.733'	E 105°10.864'	H 2100m	MT271374
Triplophysa minxianensisi-205	Triplophysa minxianensisi	Gansu Fisheries Research Institute	GS0147	China	Gansu	Tianshui	Qinzhou	N 34°34.733'	E 105°10.864'	H 2100m	MT271376
Triplophysa minxianensisi-206	Triplophysa minxianensisi	Gansu Fisheries Research Institute	GS0148	China	Gansu	Tianshui	Qinzhou	N 34°34.733'	E 105°10.864'	H 2100m	MT271374
Triplophysa minxianensisi-215	Triplophysa minxianensisi	Gansu Fisheries Research Institute	GS0157	China	Gansu	Tianshui	Qinzhou	N 34°34.733'	E 105°10.864'	H 2100m	MT271374
Triplophysa minxianensisi-219	Triplophysa minxianensisi	Gansu Fisheries Research Institute	GS0161	China	Gansu	Tianshui	Qinzhou	N 34°34.733'	E 105°10.864'	H 2100m	MT271374
Triplophysa minxianensisi-229	Triplophysa minxianensisi	Gansu Fisheries Research Institute	GS0171	China	Gansu	Tianshui	Qinzhou	N 34°34.733'	E 105°10.864'	H 2100m	MT271374
Triplophysa minxianensisi-230	Triplophysa minxianensisi	Gansu Fisheries Research Institute	GS0172	China	Gansu	Tianshui	Qinzhou	N 34°34.733'	E 105°10.864'	H 2100m	MT271374
Triplophysa minxianensisi-231	Triplophysa minxianensisi	Gansu Fisheries Research Institute	GS0173	China	Gansu	Tianshui	Qinzhou	N 34°34.733'	E 105°10.864'	H 2100m	MT271374
Triplophysa minxianensisi-232	Triplophysa minxianensisi	Gansu Fisheries Research Institute	GS0174	China	Gansu	Tianshui	Qinzhou	N 34°34.733'	E 105°10.864'	H 2100m	MT271374
Triplophysa minxianensisi-233	Triplophysa minxianensisi	Gansu Fisheries Research Institute	GS0175	China	Gansu	Tianshui	Qinzhou	N 34°34.733'	E 105°10.864'	H 2100m	MT271374
Triplophysa minxianensisi-234	Triplophysa minxianensisi	Gansu Fisheries Research Institute	GS0176	China	Gansu	Tianshui	Qinzhou	N 34°34.733'	E 105°10.864'	H 2100m	MT271378
Triplophysa minxianensisi-244	Triplophysa minxianensisi	Gansu Fisheries Research Institute	GS0186	China	Gansu	Tianshui	Qinzhou	N 34°34.733'	E 105°10.864'	H 2100m	MT271378
Triplophysa minxianensisi-249	Triplophysa minxianensisi	Gansu Fisheries Research Institute	GS0191	China	Gansu	Tianshui	Qinzhou	N 34°34.733'	E 105°10.864'	H 2100m	MT271378
Triplophysa minxianensisi-012	Triplophysa minxianensisi	Gansu Fisheries Research Institute	G0953	China	Gansu	Tianshui	Qinzhou	N 34°37.705'	E 105°21.898'	H 1512m	MT271378
Triplophysa minxianensisi-103	Triplophysa minxianensisi	Gansu Fisheries Research Institute	GS0045	China	Gansu	Tianshui	Qinzhou	N 34°37.705'	E 105°21.898'	H 1512m	MT271376
Triplophysa minxianensisi-106	Triplophysa minxianensisi	Gansu Fisheries Research Institute	GS0048	China	Gansu	Tianshui	Qinzhou	N 34°37.705'	E 105°21.898'	H 1512m	MT271376
Triplophysa minxianensisi-117	Triplophysa minxianensisi	Gansu Fisheries Research Institute	GS0059	China	Gansu	Tianshui	Qinzhou	N 34°37.705'	E 105°21.898'	H 1512m	MT271376
Triplophysa minxianensisi-121	Triplophysa minxianensisi	Gansu Fisheries Research Institute	GS0063	China	Gansu	Tianshui	Qinzhou	N 34°37.705'	E 105°21.898'	H 1512m	MT271376
Triplophysa minxianensisi-131	Triplophysa minxianensisi	Gansu Fisheries Research Institute	GS0073	China	Gansu	Tianshui	Qinzhou	N 34°37.705'	E 105°21.898'	H 1512m	MT271376
Triplophysa minxianensisi-142	Triplophysa minxianensisi	Gansu Fisheries Research Institute	GS0084	China	Gansu	Tianshui	Qinzhou	N 34°37.705'	E 105°21.898'	H 1512m	MT271378
Triplophysa minxianensisi-147	Triplophysa minxianensisi	Gansu Fisheries Research Institute	GS0089	China	Gansu	Tianshui	Qinzhou	N 34°37.705'	E 105°21.898'	H 1512m	MT271376
Triplophysa minxianensisi-154	Triplophysa minxianensisi	Gansu Fisheries Research Institute	GS0096	China	Gansu	Tianshui	Qinzhou	N 34°37.705'	E 105°21.898'	H 1512m	MT271378
Triplophysa minxianensisi-156	Triplophysa minxianensisi	Gansu Fisheries Research Institute	GS0098	China	Gansu	Tianshui	Qinzhou	N 34°37.705'	E 105°21.898'	H 1512m	MT271376
Triplophysa minxianensisi-162	Triplophysa minxianensisi	Gansu Fisheries Research Institute	GS0104	China	Gansu	Tianshui	Qinzhou	N 34°37.705'	E 105°21.898'	H 1512m	MT271378
Triplophysa minxianensisi-171	Triplophysa minxianensisi	Gansu Fisheries Research Institute	GS0113	China	Gansu	Tianshui	Qinzhou	N 34°37.705'	E 105°21.898'	H 1512m	MT271376
Triplophysa minxianensisi-174	Triplophysa minxianensisi	Gansu Fisheries Research Institute	GS0116	China	Gansu	Tianshui	Qinzhou	N 34°37.705'	E 105°21.898'	H 1512m	MT271378
Triplophysa minxianensisi-175	Triplophysa minxianensisi	Gansu Fisheries Research Institute	GS0117	China	Gansu	Tianshui	Qinzhou	N 34°37.705'	E 105°21.898'	H 1512m	MT271378
Triplophysa minxianensisi-176	Triplophysa minxianensisi	Gansu Fisheries Research Institute	GS0118	China	Gansu	Tianshui	Qinzhou	N 34°37.705'	E 105°21.898'	H 1512m	MT271378
Triplophysa minxianensisi-177	Triplophysa minxianensisi	Gansu Fisheries Research Institute	GS0119	China	Gansu	Tianshui	Qinzhou	N 34°37.705'	E 105°21.898'	H 1512m	MT271378
Triplophysa minxianensisi-178	Triplophysa minxianensisi	Gansu Fisheries Research Institute	GS0120	China	Gansu	Tianshui	Qinzhou	N 34°37.705'	E 105°21.898'	H 1512m	MT271378
Triplophysa minxianensisi-221	Triplophysa minxianensisi	Gansu Fisheries Research Institute	GS0163	China	Gansu	Tianshui	Qinzhou	N 34°37.705'	E 105°21.898'	H 1512m	MT271379
Triplophysa minxianensisi-242	Triplophysa minxianensisi	Gansu Fisheries Research Institute	GS0184	China	Gansu	Tianshui	Qinzhou	N 34°37.705'	E 105°21.898'	H 1512m	MT271379
Triplophysa minxianensisi-243	Triplophysa minxianensisi	Gansu Fisheries Research Institute	GS0185	China	Gansu	Tianshui	Qinzhou	N 34°37.705'	E 105°21.898'	H 1512m	MT271379
Triplophysa minxianensisi-251	Triplophysa minxianensisi	Gansu Fisheries Research Institute	GS0193	China	Gansu	Tianshui	Qinzhou	N 34°37.705'	E 105°21.898'	H 1512m	MT271379
Triplophysa minxianensisi-252	Triplophysa minxianensisi	Gansu Fisheries Research Institute	GS0194	China	Gansu	Tianshui	Qinzhou	N 34°37.705'	E 105°21.898'	H 1512m	MT271379
Triplophysa minxianensisi-101	Triplophysa minxianensisi	Gansu Fisheries Research Institute	GS0043	China	Gansu	Dingxi	Weiyuan	N 35° 4.982'	E 104°12.952'	H 2157m	MT271381
Triplophysa minxianensisi-102	Triplophysa minxianensisi	Gansu Fisheries Research Institute	GS0044	China	Gansu	Dingxi	Weiyuan	N 35° 4.982'	E 104°12.952'	H 2157m	MT271379
Triplophysa minxianensisi-104	Triplophysa minxianensisi	Gansu Fisheries Research Institute	GS0046	China	Gansu	Dingxi	Weiyuan	N 35° 4.982'	E 104°12.952'	H 2157m	MT271376
Triplophysa minxianensisi-105	Triplophysa minxianensisi	Gansu Fisheries Research Institute	GS0047	China	Gansu	Dingxi	Weiyuan	N 35° 4.982'	E 104°12.952'	H 2157m	MT271376
Triplophysa minxianensisi-209	Triplophysa minxianensisi	Gansu Fisheries Research Institute	GS0151	China	Gansu	Dingxi	Weiyuan	N 35° 4.982'	E 104°12.952'	H 2157m	MT271376
Triplophysa minxianensisi-026	Triplophysa minxianensisi	Gansu Fisheries Research Institute	G0967	China	Gansu	Dingxi	Weiyuan	N 35°00.890'	E 104°12.790'	H 2231m	MT271377
Triplophysa minxianensisi-107	Triplophysa minxianensisi	Gansu Fisheries Research Institute	GS0049	China	Gansu	Dingxi	Weiyuan	N 35°00.890'	E 104°12.790'	H 2231m	MT271377
Triplophysa minxianensisi-108	Triplophysa minxianensisi	Gansu Fisheries Research Institute	GS0050	China	Gansu	Dingxi	Weiyuan	N 35°00.890'	E 104°12.790'	H 2231m	MT271378
Triplophysa minxianensisi-109	Triplophysa minxianensisi	Gansu Fisheries Research Institute	GS0051	China	Gansu	Dingxi	Weiyuan	N 35°00.890'	E 104°12.790'	H 2231m	MT271395
Triplophysa minxianensisi-110	Triplophysa minxianensisi	Gansu Fisheries Research Institute	GS0052	China	Gansu	Dingxi	Weiyuan	N 35°00.890'	E 104°12.790'	H 2231m	MT271378
Triplophysa minxianensisi-111	Triplophysa minxianensisi	Gansu Fisheries Research Institute	GS0053	China	Gansu	Dingxi	Weiyuan	N 35°00.890'	E 104°12.790'	H 2231m	MT271378
Triplophysa minxianensisi-216	Triplophysa minxianensisi	Gansu Fisheries Research Institute	GS0158	China	Gansu	Dingxi	Weiyuan	N 35°00.890'	E 104°12.790'	H 2231m	MT271396
Triplophysa minxianensisi-010	Triplophysa minxianensisi	Gansu Fisheries Research Institute	G0951	China	Gansu	Tianshui	Wushan	N 34°34.054'	E 104°49.717'	H 1895m	MT271396
Triplophysa minxianensisi-037	Triplophysa minxianensisi	Gansu Fisheries Research Institute	G0978	China	Gansu	Tianshui	Wushan	N 34°34.054'	E 104°49.717'	H 1895m	MT271379
Triplophysa minxianensisi-038	Triplophysa minxianensisi	Gansu Fisheries Research Institute	G0979	China	Gansu	Tianshui	Wushan	N 34°34.054'	E 104°49.717'	H 1895m	MT271380
Triplophysa minxianensisi-039	Triplophysa minxianensisi	Gansu Fisheries Research Institute	G0980	China	Gansu	Tianshui	Wushan	N 34°34.054'	E 104°49.717'	H 1895m	MT271378
Triplophysa minxianensisi-040	Triplophysa minxianensisi	Gansu Fisheries Research Institute	G0981	China	Gansu	Tianshui	Wushan	N 34°34.054'	E 104°49.717'	H 1895m	MT271379
Triplophysa minxianensisi-041	Triplophysa minxianensisi	Gansu Fisheries Research Institute	G0982	China	Gansu	Tianshui	Wushan	N 34°34.054'	E 104°49.717'	H 1895m	MT271378
Triplophysa minxianensisi-042	Triplophysa minxianensisi	Gansu Fisheries Research Institute	G0983	China	Gansu	Tianshui	Wushan	N 34°34.054'	E 104°49.717'	H 1895m	MT271378
Triplophysa minxianensisi-043	Triplophysa minxianensisi	Gansu Fisheries Research Institute	G0984	China	Gansu	Tianshui	Wushan	N 34°34.054'	E 104°49.717'	H 1895m	MT271379
Triplophysa minxianensisi-044	Triplophysa minxianensisi	Gansu Fisheries Research Institute	G0985	China	Gansu	Tianshui	Wushan	N 34°34.054'	E 104°49.717'	H 1895m	MT271378
Triplophysa minxianensisi-045	Triplophysa minxianensisi	Gansu Fisheries Research Institute	G0986	China	Gansu	Tianshui	Wushan	N 34°34.054'	E 104°49.717'	H 1895m	MT271378
Triplophysa minxianensisi-046	Triplophysa minxianensisi	Gansu Fisheries Research Institute	G0987	China	Gansu	Tianshui	Wushan	N 34°34.054'	E 104°49.717'	H 1895m	MT271378
Triplophysa minxianensisi-066	Triplophysa minxianensisi	Gansu Fisheries Research Institute	GS0008	China	Gansu	Pingliang	Wushan	N 34°34.054'	E 104°49.717'	H 1895m	MT271378
Triplophysa minxianensisi-067	Triplophysa minxianensisi	Gansu Fisheries Research Institute	GS0009	China	Gansu	Tianshui	Wushan	N 34°34.054'	E 104°49.717'	H 1895m	MT271378
Triplophysa minxianensisi-068	Triplophysa minxianensisi	Gansu Fisheries Research Institute	GS0010	China	Gansu	Tianshui	Wushan	N 34°34.054'	E 104°49.717'	H 1895m	MT271379
Triplophysa minxianensisi-069	Triplophysa minxianensisi	Gansu Fisheries Research Institute	GS0011	China	Gansu	Tianshui	Wushan	N 34°34.054'	E 104°49.717'	H 1895m	MT271380
Triplophysa minxianensisi-070	Triplophysa minxianensisi	Gansu Fisheries Research Institute	GS0012	China	Gansu	Tianshui	Wushan	N 34°34.054'	E 104°49.717'	H 1895m	MT271382
Triplophysa minxianensisi-071	Triplophysa minxianensisi	Gansu Fisheries Research Institute	GS0013	China	Gansu	Tianshui	Wushan	N 34°34.054'	E 104°49.717'	H 1895m	MT271378
Triplophysa minxianensisi-072	Triplophysa minxianensisi	Gansu Fisheries Research Institute	GS0014	China	Gansu	Tianshui	Wushan	N 34°34.054'	E 104°49.717'	H 1895m	MT271378
Triplophysa minxianensisi-073	Triplophysa minxianensisi	Gansu Fisheries Research Institute	GS0015	China	Gansu	Tianshui	Wushan	N 34°34.054'	E 104°49.717'	H 1895m	MT271378
Triplophysa minxianensisi-074	Triplophysa minxianensisi	Gansu Fisheries Research Institute	GS0016	China	Gansu	Tianshui	Wushan	N 34°34.054'	E 104°49.717'	H 1895m	MT271378
Triplophysa minxianensisi-075	Triplophysa minxianensisi	Gansu Fisheries Research Institute	GS0017	China	Gansu	Tianshui	Wushan	N 34°34.054'	E 104°49.717'	H 1895m	MT271378
Triplophysa minxianensisi-076	Triplophysa minxianensisi	Gansu Fisheries Research Institute	GS0018	China	Gansu	Tianshui	Wushan	N 34°34.054'	E 104°49.717'	H 1895m	MT271378
Triplophysa minxianensisi-077	Triplophysa minxianensisi	Gansu Fisheries Research Institute	GS0019	China	Gansu	Tianshui	Wushan	N 34°34.054'	E 104°49.717'	H 1895m	MT271378
Triplophysa minxianensisi-207	Triplophysa minxianensisi	Gansu Fisheries Research Institute	GS0149	China	Gansu	Tianshui	Wushan	N 34°34.054'	E 104°49.717'	H 1895m	MT271378
Triplophysa minxianensisi-208	Triplophysa minxianensisi	Gansu Fisheries Research Institute	GS0150	China	Gansu	Tianshui	Wushan	N 34°34.054'	E 104°49.717'	H 1895m	MT271378
Triplophysa minxianensisi-220	Triplophysa minxianensisi	Gansu Fisheries Research Institute	GS0162	China	Gansu	Tianshui	Wushan	N 34°34.054'	E 104°49.717'	H 1895m	MT271378
Triplophysa minxianensisi-236	Triplophysa minxianensisi	Gansu Fisheries Research Institute	GS0178	China	Gansu	Tianshui	Wushan	N 34°34.054'	E 104°49.717'	H 1895m	MT271378
Triplophysa minxianensisi-163	Triplophysa minxianensisi	Gansu Fisheries Research Institute	GS0105	China	Gansu	Tianshui	Wushan	N 34°37.661'	E 104°59.538'	H 1633m	MT271378
Triplophysa minxianensisi-164	Triplophysa minxianensisi	Gansu Fisheries Research Institute	GS0106	China	Gansu	Tianshui	Wushan	N 34°37.661'	E 104°59.538'	H 1633m	MT271378
Triplophysa minxianensisi-165	Triplophysa minxianensisi	Gansu Fisheries Research Institute	GS0107	China	Gansu	Tianshui	Wushan	N 34°37.661'	E 104°59.538'	H 1633m	MT271378
Triplophysa minxianensisi-166	Triplophysa minxianensisi	Gansu Fisheries Research Institute	GS0108	China	Gansu	Tianshui	Wushan	N 34°37.661'	E 104°59.538'	H 1633m	MT271378
Triplophysa minxianensisi-167	Triplophysa minxianensisi	Gansu Fisheries Research Institute	GS0109	China	Gansu	Tianshui	Wushan	N 34°37.661'	E 104°59.538'	H 1633m	MT271378
Triplophysa minxianensisi-168	Triplophysa minxianensisi	Gansu Fisheries Research Institute	GS0110	China	Gansu	Tianshui	Wushan	N 34°37.661'	E 104°59.538'	H 1633m	MT271378
Triplophysa minxianensisi-169	Triplophysa minxianensisi	Gansu Fisheries Research Institute	GS0111	China	Gansu	Tianshui	Wushan	N 34°37.661'	E 104°59.538'	H 1633m	MT271382
Triplophysa minxianensisi-170	Triplophysa minxianensisi	Gansu Fisheries Research Institute	GS0112	China	Gansu	Tianshui	Wushan	N 34°37.661'	E 104°59.538'	H 1633m	MT271382
Triplophysa minxianensisi-172	Triplophysa minxianensisi	Gansu Fisheries Research Institute	GS0114	China	Gansu	Tianshui	Wushan	N 34°37.661'	E 104°59.538'	H 1633m	MT271382
Triplophysa minxianensisi-173	Triplophysa minxianensisi	Gansu Fisheries Research Institute	GS0115	China	Gansu	Tianshui	Wushan	N 34°37.661'	E 104°59.538'	H 1633m	MT271382
Triplophysa minxianensisi-248	Triplophysa minxianensisi	Gansu Fisheries Research Institute	GS0190	China	Gansu	Tianshui	Wushan	N 34°37.661'	E 104°59.538'	H 1633m	MT271378
Triplophysa minxianensisi-250	Triplophysa minxianensisi	Gansu Fisheries Research Institute	GS0192	China	Gansu	Tianshui	Wushan	N 34°37.661'	E 104°59.538'	H 1633m	MT271378
Triplophysa minxianensisi-013	Triplophysa minxianensisi	Gansu Fisheries Research Institute	G0954	China	Gansu	Tianshui	Wushan	N 34°42.826'	E 104°43.420'	H 1621m	MT271378
Triplophysa minxianensisi-143	Triplophysa minxianensisi	Gansu Fisheries Research Institute	GS0085	China	Gansu	Tianshui	Wushan	N 34°42.826'	E 104°43.420'	H 1621m	MT271378
Triplophysa minxianensisi-144	Triplophysa minxianensisi	Gansu Fisheries Research Institute	GS0086	China	Gansu	Tianshui	Wushan	N 34°42.826'	E 104°43.420'	H 1621m	MT271378
Triplophysa minxianensisi-145	Triplophysa minxianensisi	Gansu Fisheries Research Institute	GS0087	China	Gansu	Tianshui	Wushan	N 34°42.826'	E 104°43.420'	H 1621m	MT271378
Triplophysa minxianensisi-146	Triplophysa minxianensisi	Gansu Fisheries Research Institute	GS0088	China	Gansu	Tianshui	Wushan	N 34°42.826'	E 104°43.420'	H 1621m	MT271394
Triplophysa minxianensisi-002	Triplophysa minxianensisi	Gansu Fisheries Research Institute	G0943	China	Gansu	Linxia	Yongjing	N 35°49.630'	E 103°09.113'	H 2117m	MT271392
Triplophysa minxianensisi-122	Triplophysa minxianensisi	Gansu Fisheries Research Institute	GS0064	China	Gansu	Tianshui	Zhangjiachuan	N 34°48.243'	E 106°30.699'	H 1745m	MT271382
Triplophysa minxianensisi-123	Triplophysa minxianensisi	Gansu Fisheries Research Institute	GS0065	China	Gansu	Tianshui	Zhangjiachuan	N 34°48.243'	E 106°30.699'	H 1745m	MT271382
Triplophysa minxianensisi-124	Triplophysa minxianensisi	Gansu Fisheries Research Institute	GS0066	China	Gansu	Tianshui	Zhangjiachuan	N 34°48.243'	E 106°30.699'	H 1745m	MT271385
Triplophysa minxianensisi-125	Triplophysa minxianensisi	Gansu Fisheries Research Institute	GS0067	China	Gansu	Tianshui	Zhangjiachuan	N 34°48.243'	E 106°30.699'	H 1745m	MT271382
Triplophysa minxianensisi-126	Triplophysa minxianensisi	Gansu Fisheries Research Institute	GS0068	China	Gansu	Tianshui	Zhangjiachuan	N 34°48.243'	E 106°30.699'	H 1745m	MT271382
Triplophysa minxianensisi-127	Triplophysa minxianensisi	Gansu Fisheries Research Institute	GS0069	China	Gansu	Tianshui	Zhangjiachuan	N 34°48.243'	E 106°30.699'	H 1745m	MT271380
Triplophysa minxianensisi-128	Triplophysa minxianensisi	Gansu Fisheries Research Institute	GS0070	China	Gansu	Tianshui	Zhangjiachuan	N 34°48.243'	E 106°30.699'	H 1745m	MT271380
Triplophysa minxianensisi-129	Triplophysa minxianensisi	Gansu Fisheries Research Institute	GS0071	China	Gansu	Tianshui	Zhangjiachuan	N 34°48.243'	E 106°30.699'	H 1745m	MT271378
Triplophysa minxianensisi-130	Triplophysa minxianensisi	Gansu Fisheries Research Institute	GS0072	China	Gansu	Tianshui	Zhangjiachuan	N 34°48.243'	E 106°30.699'	H 1745m	MT271378
Triplophysa minxianensisi-132	Triplophysa minxianensisi	Gansu Fisheries Research Institute	GS0074	China	Gansu	Tianshui	Zhangjiachuan	N 34°48.243'	E 106°30.699'	H 1745m	MT271383
Triplophysa minxianensisi-133	Triplophysa minxianensisi	Gansu Fisheries Research Institute	GS0075	China	Gansu	Tianshui	Zhangjiachuan	N 34°48.243'	E 106°30.699'	H 1745m	MT271375
Triplophysa minxianensisi-134	Triplophysa minxianensisi	Gansu Fisheries Research Institute	GS0076	China	Gansu	Tianshui	Zhangjiachuan	N 34°48.243'	E 106°30.699'	H 1745m	MT271375
Triplophysa minxianensisi-135	Triplophysa minxianensisi	Gansu Fisheries Research Institute	GS0077	China	Gansu	Tianshui	Zhangjiachuan	N 34°48.243'	E 106°30.699'	H 1745m	MT271375
Triplophysa minxianensisi-136	Triplophysa minxianensisi	Gansu Fisheries Research Institute	GS0078	China	Gansu	Tianshui	Zhangjiachuan	N 34°48.243'	E 106°30.699'	H 1745m	MT271375
Triplophysa minxianensisi-137	Triplophysa minxianensisi	Gansu Fisheries Research Institute	GS0079	China	Gansu	Tianshui	Zhangjiachuan	N 34°48.243'	E 106°30.699'	H 1745m	MT271375
Triplophysa minxianensisi-138	Triplophysa minxianensisi	Gansu Fisheries Research Institute	GS0080	China	Gansu	Tianshui	Zhangjiachuan	N 34°48.243'	E 106°30.699'	H 1745m	MT271380
Triplophysa minxianensisi-139	Triplophysa minxianensisi	Gansu Fisheries Research Institute	GS0081	China	Gansu	Tianshui	Zhangjiachuan	N 34°48.243'	E 106°30.699'	H 1745m	MT271380
Triplophysa minxianensisi-140	Triplophysa minxianensisi	Gansu Fisheries Research Institute	GS0082	China	Gansu	Tianshui	Zhangjiachuan	N 34°48.243'	E 106°30.699'	H 1745m	MT271380
Triplophysa minxianensisi-141	Triplophysa minxianensisi	Gansu Fisheries Research Institute	GS0083	China	Gansu	Tianshui	Zhangjiachuan	N 34°48.243'	E 106°30.699'	H 1745m	MT271378
Triplophysa minxianensisi-210	Triplophysa minxianensisi	Gansu Fisheries Research Institute	GS0152	China	Gansu	Tianshui	Zhangjiachuan	N 34°48.243'	E 106°30.699'	H 1745m	MT271378
Triplophysa minxianensisi-211	Triplophysa minxianensisi	Gansu Fisheries Research Institute	GS0153	China	Gansu	Tianshui	Zhangjiachuan	N 34°48.243'	E 106°30.699'	H 1745m	MT271375
Triplophysa minxianensisi-217	Triplophysa minxianensisi	Gansu Fisheries Research Institute	GS0159	China	Gansu	Tianshui	Zhangjiachuan	N 34°48.243'	E 106°30.699'	H 1745m	MT271375
Triplophysa minxianensisi-239	Triplophysa minxianensisi	Gansu Fisheries Research Institute	GS0181	China	Gansu	Tianshui	Zhangjiachuan	N 34°48.243'	E 106°30.699'	H 1745m	MT271375
Triplophysa minxianensisi-246	Triplophysa minxianensisi	Gansu Fisheries Research Institute	GS0188	China	Gansu	Tianshui	Zhangjiachuan	N 34°48.243'	E 106°30.699'	H 1745m	MT271387
Triplophysa minxianensisi-247	Triplophysa minxianensisi	Gansu Fisheries Research Institute	GS0189	China	Gansu	Tianshui	Zhangjiachuan	N 34°48.243'	E 106°30.699'	H 1745m	MT271375
Triplophysa minxianensisi-011	Triplophysa minxianensisi	Gansu Fisheries Research Institute	G0952	China	Gansu	Dingxi	Zhangxian	N 34°39.152'	E 104°30.146'	H 1825m	MT271375
Triplophysa minxianensisi-081	Triplophysa minxianensisi	Gansu Fisheries Research Institute	GS0023	China	Gansu	Dingxi	Zhangxian	N 34°39.152'	E 104°30.146'	H 1825m	MT271375
Triplophysa minxianensisi-082	Triplophysa minxianensisi	Gansu Fisheries Research Institute	GS0024	China	Gansu	Dingxi	Zhangxian	N 34°39.152'	E 104°30.146'	H 1825m	MT271375
Triplophysa minxianensisi-083	Triplophysa minxianensisi	Gansu Fisheries Research Institute	GS0025	China	Gansu	Dingxi	Zhangxian	N 34°39.152'	E 104°30.146'	H 1825m	MT271386
Triplophysa minxianensisi-084	Triplophysa minxianensisi	Gansu Fisheries Research Institute	GS0026	China	Gansu	Dingxi	Zhangxian	N 34°39.152'	E 104°30.146'	H 1825m	MT271375
Triplophysa minxianensisi-085	Triplophysa minxianensisi	Gansu Fisheries Research Institute	GS0027	China	Gansu	Dingxi	Zhangxian	N 34°39.152'	E 104°30.146'	H 1825m	MT271375
Triplophysa minxianensisi-086	Triplophysa minxianensisi	Gansu Fisheries Research Institute	GS0028	China	Gansu	Dingxi	Zhangxian	N 34°39.152'	E 104°30.146'	H 1825m	MT271375
Triplophysa minxianensisi-087	Triplophysa minxianensisi	Gansu Fisheries Research Institute	GS0029	China	Gansu	Dingxi	Zhangxian	N 34°39.152'	E 104°30.146'	H 1825m	MT271375
Triplophysa minxianensisi-088	Triplophysa minxianensisi	Gansu Fisheries Research Institute	GS0030	China	Gansu	Dingxi	Zhangxian	N 34°39.152'	E 104°30.146'	H 1825m	MT271375
Triplophysa minxianensisi-089	Triplophysa minxianensisi	Gansu Fisheries Research Institute	GS0031	China	Gansu	Dingxi	Zhangxian	N 34°39.152'	E 104°30.146'	H 1825m	MT271375
Triplophysa minxianensisi-090	Triplophysa minxianensisi	Gansu Fisheries Research Institute	GS0032	China	Gansu	Dingxi	Zhangxian	N 34°39.152'	E 104°30.146'	H 1825m	MT271391
Triplophysa minxianensisi-235	Triplophysa minxianensisi	Gansu Fisheries Research Institute	GS0177	China	Gansu	Dingxi	Zhangxian	N 34°39.152'	E 104°30.146'	H 1825m	MT271375
Triplophysa minxianensisi-149	Triplophysa minxianensisi	Gansu Fisheries Research Institute	GS0091	China	Gansu	Dingxi	Zhangxian	N 34°52.123'	E 104°22.626'	H 1971m	MT271390
Triplophysa minxianensisi-150	Triplophysa minxianensisi	Gansu Fisheries Research Institute	GS0092	China	Gansu	Dingxi	Zhangxian	N 34°52.123'	E 104°22.626'	H 1971m	MT271389
Triplophysa minxianensisi-151	Triplophysa minxianensisi	Gansu Fisheries Research Institute	GS0093	China	Gansu	Dingxi	Zhangxian	N 34°52.123'	E 104°22.626'	H 1971m	MT271389
Triplophysa minxianensisi-152	Triplophysa minxianensisi	Gansu Fisheries Research Institute	GS0094	China	Gansu	Dingxi	Zhangxian	N 34°52.123'	E 104°22.626'	H 1971m	MT271389
Triplophysa minxianensisi-153	Triplophysa minxianensisi	Gansu Fisheries Research Institute	GS0095	China	Gansu	Dingxi	Zhangxian	N 34°52.123'	E 104°22.626'	H 1971m	MT271389
Triplophysa minxianensisi-240	Triplophysa minxianensisi	Gansu Fisheries Research Institute	GS0182	China	Gansu	Dingxi	Zhangxian	N 34°52.123'	E 104°22.626'	H 1971m	MT271389
Triplophysa minxianensisi-241	Triplophysa minxianensisi	Gansu Fisheries Research Institute	GS0183	China	Gansu	Dingxi	Zhangxian	N 34°52.123'	E 104°22.626'	H 1971m	MT271389
Triplophysa minxianensisi-064	Triplophysa minxianensisi	Gansu Fisheries Research Institute	GS0006	China	Gansu	Pingliang	Zhuanglang	N 35°19.414'	E 105°57.493'	H 1657m	MT271389
Triplophysa minxianensisi-065	Triplophysa minxianensisi	Gansu Fisheries Research Institute	GS0007	China	Gansu	Pingliang	Zhuanglang	N 35°19.414'	E 105°57.493'	H 1657m	MT271389
Triplophysa minxianensisi-005	Triplophysa minxianensisi	Gansu Fisheries Research Institute	G0946	China	Gansu	Gannan	Zhuoni	N 34°59.590'	E 103°48.918'	H 2085m	MT271384
Triplophysa minxianensisi-258	Triplophysa minxianensisi sp1	Gansu Fisheries Research Institute	GS0200	China	Gansu	Tianshui	Qingshui	N 34°36.559'	E 105°57.625'	H 1136m	MT271375
Triplophysa minxianensisi-267	Triplophysa minxianensisi sp1	Gansu Fisheries Research Institute	GS0209	China	Gansu	Tianshui	Qingshui	N 34°36.559'	E 105°57.625'	H 1136m	MT271375
Triplophysa minxianensisi-268	Triplophysa minxianensisi sp1	Gansu Fisheries Research Institute	GS0210	China	Gansu	Tianshui	Qingshui	N 34°36.559'	E 105°57.625'	H 1136m	MT271375
Triplophysa minxianensisi-270	Triplophysa minxianensisi sp1	Gansu Fisheries Research Institute	GS0212	China	Gansu	Tianshui	Qingshui	N 34°36.559'	E 105°57.625'	H 1136m	MT271375
Triplophysa minxianensisi-254	Triplophysa minxianensisi sp1	Gansu Fisheries Research Institute	GS0196	China	Gansu	Tianshui	Qingshui	N 34°47.26'	E 104°11.629'	H 1430m	MT271375
Triplophysa minxianensisi-260	Triplophysa minxianensisi sp1	Gansu Fisheries Research Institute	GS0202	China	Gansu	Tianshui	Qingshui	N 34°47.26'	E 104°11.629'	H 1430m	MT271375
Triplophysa minxianensisi-269	Triplophysa minxianensisi sp1	Gansu Fisheries Research Institute	GS0211	China	Gansu	Tianshui	Qingshui	N 34°47.26'	E 104°11.629'	H 1430m	MT271375
Triplophysa minxianensisi-261	Triplophysa minxianensisi sp1	Gansu Fisheries Research Institute	GS0203	China	Gansu	Tianshui	Qinzhou	N 34°31.881'	E 105°16.939'	H 1927m	MT271375
Triplophysa minxianensisi-262	Triplophysa minxianensisi sp1	Gansu Fisheries Research Institute	GS0204	China	Gansu	Tianshui	Qinzhou	N 34°31.881'	E 105°16.939'	H 1927m	MT271381
Triplophysa minxianensisi-263	Triplophysa minxianensisi sp1	Gansu Fisheries Research Institute	GS0205	China	Gansu	Tianshui	Qinzhou	N 34°31.881'	E 105°16.939'	H 1927m	MT271375
Triplophysa minxianensisi-255	Triplophysa minxianensisi sp1	Gansu Fisheries Research Institute	GS0197	China	Gansu	Tianshui	Qinzhou	N 34°34.733'	E 105°10.864'	H 2100m	MT271381
Triplophysa minxianensisi-256	Triplophysa minxianensisi sp1	Gansu Fisheries Research Institute	GS0198	China	Gansu	Tianshui	Qinzhou	N 34°34.733'	E 105°10.864'	H 2100m	MT271375
Triplophysa minxianensisi-264	Triplophysa minxianensisi sp1	Gansu Fisheries Research Institute	GS0206	China	Gansu	Tianshui	Qinzhou	N 34°34.733'	E 105°10.864'	H 2100m	MT271381
Triplophysa minxianensisi-257	Triplophysa minxianensisi sp1	Gansu Fisheries Research Institute	GS0199	China	Gansu	Tianshui	Qinzhou	N 34°37.705'	E 105°21.898'	H 1512m	MT271381
Triplophysa minxianensisi-259	Triplophysa minxianensisi sp1	Gansu Fisheries Research Institute	GS0201	China	Gansu	Tianshui	Qinzhou	N 34°37.705'	E 105°21.898'	H 1512m	MT271381
Triplophysa minxianensisi-272	Triplophysa minxianensisi sp1	Gansu Fisheries Research Institute	GS0214	China	Gansu	Tianshui	Qinzhou	N 34°37.705'	E 105°21.898'	H 1512m	MT271381
Triplophysa minxianensisi-273	Triplophysa minxianensisi sp1	Gansu Fisheries Research Institute	GS0215	China	Gansu	Tianshui	Qinzhou	N 34°37.705'	E 105°21.898'	H 1512m	MT271381
Triplophysa minxianensisi-271	Triplophysa minxianensisi sp1	Gansu Fisheries Research Institute	GS0213	China	Gansu	Tianshui	Zhangjiachuan	N 34°48.243'	E 106°30.699'	H 1745m	MT271381
Triplophysa minxianensisi-265	Triplophysa minxianensisi sp1	Gansu Fisheries Research Institute	GS0207	China	Gansu	Pingliang	Zhuanglang	N 35°19.414'	E 105°57.493'	H 1657m	MT271381
Triplophysa minxianensisi-266	Triplophysa minxianensisi sp1	Gansu Fisheries Research Institute	GS0208	China	Gansu	Pingliang	Zhuanglang	N 35°19.414'	E 105°57.493'	H 1657m	MT271381
Triplophysa obscura-132	Triplophysa obscura	Gansu Fisheries Research Institute	G0744	China	Gansu	Longnan	Chengxian	N 33°42.037'	E 105°38.898'	H 997m	MT271400
Triplophysa obscura-133	Triplophysa obscura	Gansu Fisheries Research Institute	G0745	China	Gansu	Longnan	Chengxian	N 33°42.037'	E 105°38.898'	H 997m	MT271400
Triplophysa obscura-134	Triplophysa obscura	Gansu Fisheries Research Institute	G0746	China	Gansu	Longnan	Chengxian	N 33°42.037'	E 105°38.898'	H 997m	MT271399
Triplophysa obscura-129	Triplophysa obscura	Gansu Fisheries Research Institute	G0741	China	Gansu	Longnan	Chengxian	N 33°42.786'	E 105°45.970'	H 1963m	MT271400
Triplophysa obscura-130	Triplophysa obscura	Gansu Fisheries Research Institute	G0742	China	Gansu	Longnan	Chengxian	N 33°42.786'	E 105°45.970'	H 1963m	MT271400
Triplophysa obscura-131	Triplophysa obscura	Gansu Fisheries Research Institute	G0743	China	Gansu	Longnan	Chengxian	N 33°42.786'	E 105°45.970'	H 1963m	MT271401
Triplophysa obscura-139	Triplophysa obscura	Gansu Fisheries Research Institute	G0751	China	Gansu	Longnan	Chengxian	N 33°42.786'	E 105°45.970'	H 1963m	MT271401
Triplophysa obscura-179	Triplophysa obscura	Gansu Fisheries Research Institute	G0791	China	Gansu	Tianshui	Gangu	N 34°45.585'	E 105°10.807'	H 1324m	MT271400
Triplophysa obscura-180	Triplophysa obscura	Gansu Fisheries Research Institute	G0792	China	Gansu	Tianshui	Gangu	N 34°45.585'	E 105°10.807'	H 1324m	MT271401
Triplophysa obscura-228	Triplophysa obscura	Gansu Fisheries Research Institute	G0840	China	Gansu	Tianshui	Gangu	N 34°45.585'	E 105°10.807'	H 1324m	MT271400
Triplophysa obscura-168	Triplophysa obscura	Gansu Fisheries Research Institute	G0780	China	Gansu	Gannan	Hezuo	N 34°40.451'	E 103°00.445'	H 2808m	MT271400
Triplophysa obscura-169	Triplophysa obscura	Gansu Fisheries Research Institute	G0781	China	Gansu	Gannan	Hezuo	N 34°40.451'	E 103°00.445'	H 2808m	MT271401
Triplophysa obscura-170	Triplophysa obscura	Gansu Fisheries Research Institute	G0782	China	Gansu	Gannan	Hezuo	N 34°40.451'	E 103°00.445'	H 2808m	MT271400
Triplophysa obscura-182	Triplophysa obscura	Gansu Fisheries Research Institute	G0794	China	Gansu	Gannan	Hezuo	N 34°40.451'	E 103°00.445'	H 2808m	MT271400
Triplophysa obscura-183	Triplophysa obscura	Gansu Fisheries Research Institute	G0795	China	Gansu	Gannan	Hezuo	N 34°40.451'	E 103°00.445'	H 2808m	MT271400
Triplophysa obscura-184	Triplophysa obscura	Gansu Fisheries Research Institute	G0796	China	Gansu	Gannan	Hezuo	N 34°40.451'	E 103°00.445'	H 2808m	MT271400
Triplophysa obscura-185	Triplophysa obscura	Gansu Fisheries Research Institute	G0797	China	Gansu	Gannan	Hezuo	N 34°40.451'	E 103°00.445'	H 2808m	MT271400
Triplophysa obscura-186	Triplophysa obscura	Gansu Fisheries Research Institute	G0798	China	Gansu	Gannan	Hezuo	N 34°40.451'	E 103°00.445'	H 2808m	MT271400
Triplophysa obscura-187	Triplophysa obscura	Gansu Fisheries Research Institute	G0799	China	Gansu	Gannan	Hezuo	N 34°40.451'	E 103°00.445'	H 2808m	MT271400
Triplophysa obscura-188	Triplophysa obscura	Gansu Fisheries Research Institute	G0800	China	Gansu	Gannan	Hezuo	N 34°40.451'	E 103°00.445'	H 2808m	MT271400
Triplophysa obscura-204	Triplophysa obscura	Gansu Fisheries Research Institute	G0816	China	Gansu	Gannan	Hezuo	N 34°40.451'	E 103°00.445'	H 2808m	MT271400
Triplophysa obscura-100	Triplophysa obscura	Gansu Fisheries Research Institute	G0712	China	Gansu	Longnan	Huixian	N 33°38.059'	E 106°12.619'	H 1967m	MT271400
Triplophysa obscura-101	Triplophysa obscura	Gansu Fisheries Research Institute	G0713	China	Gansu	Longnan	Huixian	N 33°38.059'	E 106°12.619'	H 1967m	MT271401
Triplophysa obscura-102	Triplophysa obscura	Gansu Fisheries Research Institute	G0714	China	Gansu	Longnan	Huixian	N 33°38.059'	E 106°12.619'	H 1967m	MT271400
Triplophysa obscura-103	Triplophysa obscura	Gansu Fisheries Research Institute	G0715	China	Gansu	Longnan	Huixian	N 33°38.059'	E 106°12.619'	H 1967m	MT271401
Triplophysa obscura-104	Triplophysa obscura	Gansu Fisheries Research Institute	G0716	China	Gansu	Longnan	Huixian	N 33°38.059'	E 106°12.619'	H 1967m	MT271401
Triplophysa obscura-091	Triplophysa obscura	Gansu Fisheries Research Institute	G0703	China	Gansu	Longnan	Huixian	N 33°53.235'	E 105°53.979'	H 1950m	MT271400
Triplophysa obscura-092	Triplophysa obscura	Gansu Fisheries Research Institute	G0704	China	Gansu	Longnan	Huixian	N 33°53.235'	E 105°53.979'	H 1950m	MT271403
Triplophysa obscura-093	Triplophysa obscura	Gansu Fisheries Research Institute	G0705	China	Gansu	Longnan	Huixian	N 33°53.235'	E 105°53.979'	H 1950m	MT271403
Triplophysa obscura-094	Triplophysa obscura	Gansu Fisheries Research Institute	G0706	China	Gansu	Longnan	Huixian	N 33°53.235'	E 105°53.979'	H 1950m	MT271403
Triplophysa obscura-095	Triplophysa obscura	Gansu Fisheries Research Institute	G0707	China	Gansu	Longnan	Huixian	N 33°53.235'	E 105°53.979'	H 1950m	MT271401
Triplophysa obscura-096	Triplophysa obscura	Gansu Fisheries Research Institute	G0708	China	Gansu	Longnan	Huixian	N 33°53.235'	E 105°53.979'	H 1950m	MT271400
Triplophysa obscura-097	Triplophysa obscura	Gansu Fisheries Research Institute	G0709	China	Gansu	Longnan	Huixian	N 33°53.235'	E 105°53.979'	H 1950m	MT271401
Triplophysa obscura-098	Triplophysa obscura	Gansu Fisheries Research Institute	G0710	China	Gansu	Longnan	Huixian	N 33°53.235'	E 105°53.979'	H 1950m	MT271403
Triplophysa obscura-099	Triplophysa obscura	Gansu Fisheries Research Institute	G0711	China	Gansu	Longnan	Huixian	N 33°53.235'	E 105°53.979'	H 1950m	MT271400
Triplophysa obscura-105	Triplophysa obscura	Gansu Fisheries Research Institute	G0717	China	Gansu	Longnan	Huixian	N 33°53.235'	E 105°53.979'	H 1950m	MT271400
Triplophysa obscura-106	Triplophysa obscura	Gansu Fisheries Research Institute	G0718	China	Gansu	Longnan	Huixian	N 33°53.235'	E 105°53.979'	H 1950m	MT271400
Triplophysa obscura-107	Triplophysa obscura	Gansu Fisheries Research Institute	G0719	China	Gansu	Longnan	Huixian	N 33°53.235'	E 105°53.979'	H 1950m	MT271400
Triplophysa obscura-108	Triplophysa obscura	Gansu Fisheries Research Institute	G0720	China	Gansu	Longnan	Huixian	N 33°53.235'	E 105°53.979'	H 1950m	MT271400
Triplophysa obscura-109	Triplophysa obscura	Gansu Fisheries Research Institute	G0721	China	Gansu	Longnan	Huixian	N 33°53.235'	E 105°53.979'	H 1950m	MT271400
Triplophysa obscura-110	Triplophysa obscura	Gansu Fisheries Research Institute	G0722	China	Gansu	Longnan	Huixian	N 33°53.235'	E 105°53.979'	H 1950m	MT271400
Triplophysa obscura-111	Triplophysa obscura	Gansu Fisheries Research Institute	G0723	China	Gansu	Longnan	Huixian	N 33°53.235'	E 105°53.979'	H 1950m	MT271400
Triplophysa obscura-112	Triplophysa obscura	Gansu Fisheries Research Institute	G0724	China	Gansu	Longnan	Huixian	N 33°53.235'	E 105°53.979'	H 1950m	MT271400
Triplophysa obscura-113	Triplophysa obscura	Gansu Fisheries Research Institute	G0725	China	Gansu	Longnan	Huixian	N 33°53.235'	E 105°53.979'	H 1950m	MT271400
Triplophysa obscura-114	Triplophysa obscura	Gansu Fisheries Research Institute	G0726	China	Gansu	Longnan	Huixian	N 33°53.235'	E 105°53.979'	H 1950m	MT271401
Triplophysa obscura-115	Triplophysa obscura	Gansu Fisheries Research Institute	G0727	China	Gansu	Longnan	Huixian	N 33°53.235'	E 105°53.979'	H 1950m	MT271400
Triplophysa obscura-116	Triplophysa obscura	Gansu Fisheries Research Institute	G0728	China	Gansu	Longnan	Huixian	N 33°53.235'	E 105°53.979'	H 1950m	MT271401
Triplophysa obscura-117	Triplophysa obscura	Gansu Fisheries Research Institute	G0729	China	Gansu	Longnan	Huixian	N 33°53.235'	E 105°53.979'	H 1950m	MT271401
Triplophysa obscura-118	Triplophysa obscura	Gansu Fisheries Research Institute	G0730	China	Gansu	Longnan	Huixian	N 33°53.235'	E 105°53.979'	H 1950m	MT271401
Triplophysa obscura-119	Triplophysa obscura	Gansu Fisheries Research Institute	G0731	China	Gansu	Longnan	Huixian	N 33°53.235'	E 105°53.979'	H 1950m	MT271401
Triplophysa obscura-120	Triplophysa obscura	Gansu Fisheries Research Institute	G0732	China	Gansu	Longnan	Huixian	N 33°53.235'	E 105°53.979'	H 1950m	MT271420
Triplophysa obscura-121	Triplophysa obscura	Gansu Fisheries Research Institute	G0733	China	Gansu	Longnan	Huixian	N 33°53.235'	E 105°53.979'	H 1950m	MT271401
Triplophysa obscura-122	Triplophysa obscura	Gansu Fisheries Research Institute	G0734	China	Gansu	Longnan	Huixian	N 33°53.235'	E 105°53.979'	H 1950m	MT271421
Triplophysa obscura-049	Triplophysa obscura	Gansu Fisheries Research Institute	G0661	China	Gansu	Longnan	Kangxian	N 33°26.880'	E 105°24.792'	H 1230m	MT271403
Triplophysa obscura-036	Triplophysa obscura	Gansu Fisheries Research Institute	G0648	China	Gansu	Longnan	Kangxian	N 33°26.880'	E 105°24.792'	H 1230m	MT271420
Triplophysa obscura-050	Triplophysa obscura	Gansu Fisheries Research Institute	G0662	China	Gansu	Longnan	Kangxian	N 33°26.880'	E 105°24.792'	H 1230m	MT271420
Triplophysa obscura-051	Triplophysa obscura	Gansu Fisheries Research Institute	G0663	China	Gansu	Longnan	Kangxian	N 33°26.880'	E 105°24.792'	H 1230m	MT271401
Triplophysa obscura-052	Triplophysa obscura	Gansu Fisheries Research Institute	G0664	China	Gansu	Longnan	Kangxian	N 33°26.880'	E 105°24.792'	H 1230m	MT271401
Triplophysa obscura-053	Triplophysa obscura	Gansu Fisheries Research Institute	G0665	China	Gansu	Longnan	Kangxian	N 33°26.880'	E 105°24.792'	H 1230m	MT271403
Triplophysa obscura-054	Triplophysa obscura	Gansu Fisheries Research Institute	G0666	China	Gansu	Longnan	Kangxian	N 33°26.880'	E 105°24.792'	H 1230m	MT271401
Triplophysa obscura-055	Triplophysa obscura	Gansu Fisheries Research Institute	G0667	China	Gansu	Longnan	Kangxian	N 33°26.880'	E 105°24.792'	H 1230m	MT271403
Triplophysa obscura-056	Triplophysa obscura	Gansu Fisheries Research Institute	G0668	China	Gansu	Longnan	Kangxian	N 33°26.880'	E 105°24.792'	H 1230m	MT271401
Triplophysa obscura-057	Triplophysa obscura	Gansu Fisheries Research Institute	G0669	China	Gansu	Longnan	Kangxian	N 33°26.880'	E 105°24.792'	H 1230m	MT271401
Triplophysa obscura-058	Triplophysa obscura	Gansu Fisheries Research Institute	G0670	China	Gansu	Longnan	Kangxian	N 33°26.880'	E 105°24.792'	H 1230m	MT271401
Triplophysa obscura-059	Triplophysa obscura	Gansu Fisheries Research Institute	G0671	China	Gansu	Longnan	Kangxian	N 33°26.880'	E 105°24.792'	H 1230m	MT271401
Triplophysa obscura-060	Triplophysa obscura	Gansu Fisheries Research Institute	G0672	China	Gansu	Longnan	Kangxian	N 33°26.880'	E 105°24.792'	H 1230m	MT271401
Triplophysa obscura-061	Triplophysa obscura	Gansu Fisheries Research Institute	G0673	China	Gansu	Longnan	Kangxian	N 33°26.880'	E 105°24.792'	H 1230m	MT271401
Triplophysa obscura-062	Triplophysa obscura	Gansu Fisheries Research Institute	G0674	China	Gansu	Longnan	Kangxian	N 33°26.880'	E 105°24.792'	H 1230m	MT271401
Triplophysa obscura-063	Triplophysa obscura	Gansu Fisheries Research Institute	G0675	China	Gansu	Longnan	Kangxian	N 33°26.880'	E 105°24.792'	H 1230m	MT271401
Triplophysa obscura-064	Triplophysa obscura	Gansu Fisheries Research Institute	G0676	China	Gansu	Longnan	Kangxian	N 33°26.880'	E 105°24.792'	H 1230m	MT271421
Triplophysa obscura-065	Triplophysa obscura	Gansu Fisheries Research Institute	G0677	China	Gansu	Longnan	Kangxian	N 33°26.880'	E 105°24.792'	H 1230m	MT271421
Triplophysa obscura-066	Triplophysa obscura	Gansu Fisheries Research Institute	G0678	China	Gansu	Longnan	Kangxian	N 33°26.880'	E 105°24.792'	H 1230m	MT271421
Triplophysa obscura-067	Triplophysa obscura	Gansu Fisheries Research Institute	G0679	China	Gansu	Longnan	Kangxian	N 33°26.880'	E 105°24.792'	H 1230m	MT271422
Triplophysa obscura-068	Triplophysa obscura	Gansu Fisheries Research Institute	G0680	China	Gansu	Longnan	Kangxian	N 33°26.880'	E 105°24.792'	H 1230m	MT271401
Triplophysa obscura-069	Triplophysa obscura	Gansu Fisheries Research Institute	G0681	China	Gansu	Longnan	Kangxian	N 33°26.880'	E 105°24.792'	H 1230m	MT271403
Triplophysa obscura-070	Triplophysa obscura	Gansu Fisheries Research Institute	G0682	China	Gansu	Longnan	Kangxian	N 33°26.880'	E 105°24.792'	H 1230m	MT271403
Triplophysa obscura-071	Triplophysa obscura	Gansu Fisheries Research Institute	G0683	China	Gansu	Longnan	Kangxian	N 33°26.880'	E 105°24.792'	H 1230m	MT271403
Triplophysa obscura-072	Triplophysa obscura	Gansu Fisheries Research Institute	G0684	China	Gansu	Longnan	Kangxian	N 33°26.880'	E 105°24.792'	H 1230m	MT271401
Triplophysa obscura-001	Triplophysa obscura	Gansu Fisheries Research Institute	G0613	China	Gansu	Longnan	Liangdang	N 33°55.939'	E 106°25.613'	H 1891m	MT271401
Triplophysa obscura-221	Triplophysa obscura	Gansu Fisheries Research Institute	G0833	China	Gansu	Longnan	Lixian	N 33°49.878'	E 104°52.176'	H 1358m	MT271401
Triplophysa obscura-150	Triplophysa obscura	Gansu Fisheries Research Institute	G0762	China	Gansu	Longnan	Lixian	N 33°56.006'	E 105°04.772'	H 1297m	MT271401
Triplophysa obscura-151	Triplophysa obscura	Gansu Fisheries Research Institute	G0763	China	Gansu	Longnan	Lixian	N 33°56.006'	E 105°04.772'	H 1297m	MT271401
Triplophysa obscura-152	Triplophysa obscura	Gansu Fisheries Research Institute	G0764	China	Gansu	Longnan	Lixian	N 33°56.006'	E 105°04.772'	H 1297m	MT271401
Triplophysa obscura-153	Triplophysa obscura	Gansu Fisheries Research Institute	G0765	China	Gansu	Longnan	Lixian	N 33°56.006'	E 105°04.772'	H 1297m	MT271401
Triplophysa obscura-154	Triplophysa obscura	Gansu Fisheries Research Institute	G0766	China	Gansu	Longnan	Lixian	N 33°56.006'	E 105°04.772'	H 1297m	MT271401
Triplophysa obscura-155	Triplophysa obscura	Gansu Fisheries Research Institute	G0767	China	Gansu	Longnan	Lixian	N 33°56.006'	E 105°04.772'	H 1297m	MT271401
Triplophysa obscura-156	Triplophysa obscura	Gansu Fisheries Research Institute	G0768	China	Gansu	Longnan	Lixian	N 33°56.006'	E 105°04.772'	H 1297m	MT271401
Triplophysa obscura-157	Triplophysa obscura	Gansu Fisheries Research Institute	G0769	China	Gansu	Longnan	Lixian	N 33°56.006'	E 105°04.772'	H 1297m	MT271401
Triplophysa obscura-161	Triplophysa obscura	Gansu Fisheries Research Institute	G0773	China	Gansu	Longnan	Lixian	N 33°56.006'	E 105°04.772'	H 1297m	MT271401
Triplophysa obscura-162	Triplophysa obscura	Gansu Fisheries Research Institute	G0774	China	Gansu	Longnan	Lixian	N 33°56.006'	E 105°04.772'	H 1297m	MT271401
Triplophysa obscura-163	Triplophysa obscura	Gansu Fisheries Research Institute	G0775	China	Gansu	Longnan	Lixian	N 33°56.006'	E 105°04.772'	H 1297m	MT271401
Triplophysa obscura-164	Triplophysa obscura	Gansu Fisheries Research Institute	G0776	China	Gansu	Longnan	Lixian	N 33°56.006'	E 105°04.772'	H 1297m	MT271401
Triplophysa obscura-165	Triplophysa obscura	Gansu Fisheries Research Institute	G0777	China	Gansu	Longnan	Lixian	N 33°56.006'	E 105°04.772'	H 1297m	MT271428
Triplophysa obscura-166	Triplophysa obscura	Gansu Fisheries Research Institute	G0778	China	Gansu	Longnan	Lixian	N 33°56.006'	E 105°04.772'	H 1297m	MT271425
Triplophysa obscura-008	Triplophysa obscura	Gansu Fisheries Research Institute	G0620	China	Gansu	Longnan	Lixian	N 34°11.413'	E 105°13.147'	H 2004m	MT271401
Triplophysa obscura-042	Triplophysa obscura	Gansu Fisheries Research Institute	G0654	China	Gansu	Longnan	Lixian	N 34°11.413'	E 105°13.147'	H 2004m	MT271425
Triplophysa obscura-043	Triplophysa obscura	Gansu Fisheries Research Institute	G0655	China	Gansu	Longnan	Lixian	N 34°11.413'	E 105°13.147'	H 2004m	MT271425
Triplophysa obscura-044	Triplophysa obscura	Gansu Fisheries Research Institute	G0656	China	Gansu	Longnan	Lixian	N 34°11.413'	E 105°13.147'	H 2004m	MT271401
Triplophysa obscura-045	Triplophysa obscura	Gansu Fisheries Research Institute	G0657	China	Gansu	Longnan	Lixian	N 34°11.413'	E 105°13.147'	H 2004m	MT271401
Triplophysa obscura-046	Triplophysa obscura	Gansu Fisheries Research Institute	G0658	China	Gansu	Longnan	Lixian	N 34°11.413'	E 105°13.147'	H 2004m	MT271401
Triplophysa obscura-047	Triplophysa obscura	Gansu Fisheries Research Institute	G0659	China	Gansu	Longnan	Lixian	N 34°11.413'	E 105°13.147'	H 2004m	MT271401
Triplophysa obscura-048	Triplophysa obscura	Gansu Fisheries Research Institute	G0660	China	Gansu	Longnan	Lixian	N 34°11.413'	E 105°13.147'	H 2004m	MT271419
Triplophysa obscura-160	Triplophysa obscura	Gansu Fisheries Research Institute	G0772	China	Gansu	Longnan	Lixian	N 34°11.413'	E 105°13.147'	H 2004m	MT271401
Triplophysa obscura-167	Triplophysa obscura	Gansu Fisheries Research Institute	G0779	China	Gansu	Longnan	Lixian	N 34°11.413'	E 105°13.147'	H 2004m	MT271401
Triplophysa obscura-009	Triplophysa obscura	Gansu Fisheries Research Institute	G0621	China	Gansu	Longnan	Lixian	N 34°12.715'	E 105°15.943'	H 1434m	MT271403
Triplophysa obscura-010	Triplophysa obscura	Gansu Fisheries Research Institute	G0622	China	Gansu	Longnan	Lixian	N 34°12.715'	E 105°15.943'	H 1434m	MT271403
Triplophysa obscura-011	Triplophysa obscura	Gansu Fisheries Research Institute	G0623	China	Gansu	Longnan	Lixian	N 34°12.715'	E 105°15.943'	H 1434m	MT271401
Triplophysa obscura-012	Triplophysa obscura	Gansu Fisheries Research Institute	G0624	China	Gansu	Longnan	Lixian	N 34°12.715'	E 105°15.943'	H 1434m	MT271401
Triplophysa obscura-013	Triplophysa obscura	Gansu Fisheries Research Institute	G0625	China	Gansu	Longnan	Lixian	N 34°12.715'	E 105°15.943'	H 1434m	MT271401
Triplophysa obscura-014	Triplophysa obscura	Gansu Fisheries Research Institute	G0626	China	Gansu	Longnan	Lixian	N 34°12.715'	E 105°15.943'	H 1434m	MT271401
Triplophysa obscura-015	Triplophysa obscura	Gansu Fisheries Research Institute	G0627	China	Gansu	Longnan	Lixian	N 34°12.715'	E 105°15.943'	H 1434m	MT271403
Triplophysa obscura-016	Triplophysa obscura	Gansu Fisheries Research Institute	G0628	China	Gansu	Longnan	Lixian	N 34°12.715'	E 105°15.943'	H 1434m	MT271403
Triplophysa obscura-017	Triplophysa obscura	Gansu Fisheries Research Institute	G0629	China	Gansu	Longnan	Lixian	N 34°12.715'	E 105°15.943'	H 1434m	MT271403
Triplophysa obscura-018	Triplophysa obscura	Gansu Fisheries Research Institute	G0630	China	Gansu	Longnan	Lixian	N 34°12.715'	E 105°15.943'	H 1434m	MT271403
Triplophysa obscura-019	Triplophysa obscura	Gansu Fisheries Research Institute	G0631	China	Gansu	Longnan	Lixian	N 34°12.715'	E 105°15.943'	H 1434m	MT271403
Triplophysa obscura-020	Triplophysa obscura	Gansu Fisheries Research Institute	G0632	China	Gansu	Longnan	Lixian	N 34°12.715'	E 105°15.943'	H 1434m	MT271401
Triplophysa obscura-021	Triplophysa obscura	Gansu Fisheries Research Institute	G0633	China	Gansu	Longnan	Lixian	N 34°12.715'	E 105°15.943'	H 1434m	MT271401
Triplophysa obscura-022	Triplophysa obscura	Gansu Fisheries Research Institute	G0634	China	Gansu	Longnan	Lixian	N 34°12.715'	E 105°15.943'	H 1434m	MT271401
Triplophysa obscura-217	Triplophysa obscura	Gansu Fisheries Research Institute	G0829	China	Gansu	Longnan	Lixian	N 34°12.715'	E 105°15.943'	H 1434m	MT271401
Triplophysa obscura-034	Triplophysa obscura	Gansu Fisheries Research Institute	G0646	China	Gansu	Tianshui	Maiji	N 34°16.897'	E 106° 8.897'	H 1929m	MT271401
Triplophysa obscura-035	Triplophysa obscura	Gansu Fisheries Research Institute	G0647	China	Gansu	Tianshui	Maiji	N 34°16.897'	E 106° 8.897'	H 1929m	MT271401
Triplophysa obscura-090	Triplophysa obscura	Gansu Fisheries Research Institute	G0702	China	Gansu	Tianshui	Maiji	N 34°16.897'	E 106° 8.897'	H 1929m	MT271401
Triplophysa obscura-123	Triplophysa obscura	Gansu Fisheries Research Institute	G0735	China	Gansu	Tianshui	Maiji	N 34°16.897'	E 106° 8.897'	H 1929m	MT271403
Triplophysa obscura-202	Triplophysa obscura	Gansu Fisheries Research Institute	G0814	China	Gansu	Tianshui	Qingshui	N 34°47.26'	E 104°11.629'	H 1430m	MT271429
Triplophysa obscura-225	Triplophysa obscura	Gansu Fisheries Research Institute	G0837	China	Gansu	Tianshui	Qingshui	N 34°47.26'	E 104°11.629'	H 1430m	MT271403
Triplophysa obscura-226	Triplophysa obscura	Gansu Fisheries Research Institute	G0838	China	Gansu	Tianshui	Qingshui	N 34°47.26'	E 104°11.629'	H 1430m	MT271416
Triplophysa obscura-227	Triplophysa obscura	Gansu Fisheries Research Institute	G0839	China	Gansu	Tianshui	Qingshui	N 34°47.26'	E 104°11.629'	H 1430m	MT271403
Triplophysa obscura-086	Triplophysa obscura	Gansu Fisheries Research Institute	G0698	China	Gansu	Tianshui	Qinzhou	N 34° 7.438'	E 105°35.204'	H 1482m	MT271403
Triplophysa obscura-087	Triplophysa obscura	Gansu Fisheries Research Institute	G0699	China	Gansu	Tianshui	Qinzhou	N 34° 7.438'	E 105°35.204'	H 1482m	MT271403
Triplophysa obscura-088	Triplophysa obscura	Gansu Fisheries Research Institute	G0700	China	Gansu	Tianshui	Qinzhou	N 34° 7.438'	E 105°35.204'	H 1482m	MT271417
Triplophysa obscura-089	Triplophysa obscura	Gansu Fisheries Research Institute	G0701	China	Gansu	Tianshui	Qinzhou	N 34° 7.438'	E 105°35.204'	H 1482m	MT271403
Triplophysa obscura-125	Triplophysa obscura	Gansu Fisheries Research Institute	G0737	China	Gansu	Tianshui	Qinzhou	N 34° 7.438'	E 105°35.204'	H 1482m	MT271403
Triplophysa obscura-126	Triplophysa obscura	Gansu Fisheries Research Institute	G0738	China	Gansu	Tianshui	Qinzhou	N 34° 7.438'	E 105°35.204'	H 1482m	MT271403
Triplophysa obscura-127	Triplophysa obscura	Gansu Fisheries Research Institute	G0739	China	Gansu	Tianshui	Qinzhou	N 34° 7.438'	E 105°35.204'	H 1482m	MT271418
Triplophysa obscura-128	Triplophysa obscura	Gansu Fisheries Research Institute	G0740	China	Gansu	Tianshui	Qinzhou	N 34° 7.438'	E 105°35.204'	H 1482m	MT271427
Triplophysa obscura-135	Triplophysa obscura	Gansu Fisheries Research Institute	G0747	China	Gansu	Tianshui	Qinzhou	N 34° 7.438'	E 105°35.204'	H 1482m	MT271415
Triplophysa obscura-136	Triplophysa obscura	Gansu Fisheries Research Institute	G0748	China	Gansu	Tianshui	Qinzhou	N 34° 7.438'	E 105°35.204'	H 1482m	MT271426
Triplophysa obscura-137	Triplophysa obscura	Gansu Fisheries Research Institute	G0749	China	Gansu	Tianshui	Qinzhou	N 34° 7.438'	E 105°35.204'	H 1482m	MT271403
Triplophysa obscura-138	Triplophysa obscura	Gansu Fisheries Research Institute	G0750	China	Gansu	Tianshui	Qinzhou	N 34° 7.438'	E 105°35.204'	H 1482m	MT271403
Triplophysa obscura-140	Triplophysa obscura	Gansu Fisheries Research Institute	G0752	China	Gansu	Tianshui	Qinzhou	N 34° 7.438'	E 105°35.204'	H 1482m	MT271403
Triplophysa obscura-141	Triplophysa obscura	Gansu Fisheries Research Institute	G0753	China	Gansu	Tianshui	Qinzhou	N 34° 7.438'	E 105°35.204'	H 1482m	MT271403
Triplophysa obscura-142	Triplophysa obscura	Gansu Fisheries Research Institute	G0754	China	Gansu	Tianshui	Qinzhou	N 34° 7.438'	E 105°35.204'	H 1482m	MT271403
Triplophysa obscura-143	Triplophysa obscura	Gansu Fisheries Research Institute	G0755	China	Gansu	Tianshui	Qinzhou	N 34° 7.438'	E 105°35.204'	H 1482m	MT271403
Triplophysa obscura-144	Triplophysa obscura	Gansu Fisheries Research Institute	G0756	China	Gansu	Tianshui	Qinzhou	N 34° 7.438'	E 105°35.204'	H 1482m	MT271403
Triplophysa obscura-145	Triplophysa obscura	Gansu Fisheries Research Institute	G0757	China	Gansu	Tianshui	Qinzhou	N 34° 7.438'	E 105°35.204'	H 1482m	MT271403
Triplophysa obscura-146	Triplophysa obscura	Gansu Fisheries Research Institute	G0758	China	Gansu	Tianshui	Qinzhou	N 34° 7.438'	E 105°35.204'	H 1482m	MT271404
Triplophysa obscura-147	Triplophysa obscura	Gansu Fisheries Research Institute	G0759	China	Gansu	Tianshui	Qinzhou	N 34° 7.438'	E 105°35.204'	H 1482m	MT271404
Triplophysa obscura-148	Triplophysa obscura	Gansu Fisheries Research Institute	G0760	China	Gansu	Tianshui	Qinzhou	N 34° 7.438'	E 105°35.204'	H 1482m	MT271404
Triplophysa obscura-149	Triplophysa obscura	Gansu Fisheries Research Institute	G0761	China	Gansu	Tianshui	Qinzhou	N 34° 7.438'	E 105°35.204'	H 1482m	MT271404
Triplophysa obscura-159	Triplophysa obscura	Gansu Fisheries Research Institute	G0771	China	Gansu	Tianshui	Qinzhou	N 34° 7.438'	E 105°35.204'	H 1482m	MT271404
Triplophysa obscura-176	Triplophysa obscura	Gansu Fisheries Research Institute	G0788	China	Gansu	Tianshui	Qinzhou	N 34° 7.438'	E 105°35.204'	H 1482m	MT271404
Triplophysa obscura-177	Triplophysa obscura	Gansu Fisheries Research Institute	G0789	China	Gansu	Tianshui	Qinzhou	N 34° 7.438'	E 105°35.204'	H 1482m	MT271404
Triplophysa obscura-178	Triplophysa obscura	Gansu Fisheries Research Institute	G0790	China	Gansu	Tianshui	Qinzhou	N 34° 7.438'	E 105°35.204'	H 1482m	MT271414
Triplophysa obscura-198	Triplophysa obscura	Gansu Fisheries Research Institute	G0810	China	Gansu	Tianshui	Qinzhou	N 34° 7.438'	E 105°35.204'	H 1482m	MT271405
Triplophysa obscura-199	Triplophysa obscura	Gansu Fisheries Research Institute	G0811	China	Gansu	Tianshui	Qinzhou	N 34° 7.438'	E 105°35.204'	H 1482m	MT271405
Triplophysa obscura-200	Triplophysa obscura	Gansu Fisheries Research Institute	G0812	China	Gansu	Tianshui	Qinzhou	N 34° 7.438'	E 105°35.204'	H 1482m	MT271405
Triplophysa obscura-028	Triplophysa obscura	Gansu Fisheries Research Institute	G0640	China	Gansu	Tianshui	Qinzhou	N 34°13.242'	E 105°35.138'	H 1590m	MT271413
Triplophysa obscura-029	Triplophysa obscura	Gansu Fisheries Research Institute	G0641	China	Gansu	Tianshui	Qinzhou	N 34°13.242'	E 105°35.138'	H 1590m	MT271405
Triplophysa obscura-030	Triplophysa obscura	Gansu Fisheries Research Institute	G0642	China	Gansu	Tianshui	Qinzhou	N 34°13.242'	E 105°35.138'	H 1590m	MT271406
Triplophysa obscura-031	Triplophysa obscura	Gansu Fisheries Research Institute	G0643	China	Gansu	Tianshui	Qinzhou	N 34°13.242'	E 105°35.138'	H 1590m	MT271406
Triplophysa obscura-032	Triplophysa obscura	Gansu Fisheries Research Institute	G0644	China	Gansu	Tianshui	Qinzhou	N 34°13.242'	E 105°35.138'	H 1590m	MT271405
Triplophysa obscura-076	Triplophysa obscura	Gansu Fisheries Research Institute	G0688	China	Gansu	Tianshui	Qinzhou	N 34°13.242'	E 105°35.138'	H 1590m	MT271406
Triplophysa obscura-077	Triplophysa obscura	Gansu Fisheries Research Institute	G0689	China	Gansu	Tianshui	Qinzhou	N 34°13.242'	E 105°35.138'	H 1590m	MT271405
Triplophysa obscura-078	Triplophysa obscura	Gansu Fisheries Research Institute	G0690	China	Gansu	Tianshui	Qinzhou	N 34°13.242'	E 105°35.138'	H 1590m	MT271406
Triplophysa obscura-079	Triplophysa obscura	Gansu Fisheries Research Institute	G0691	China	Gansu	Tianshui	Qinzhou	N 34°13.242'	E 105°35.138'	H 1590m	MT271405
Triplophysa obscura-080	Triplophysa obscura	Gansu Fisheries Research Institute	G0692	China	Gansu	Tianshui	Qinzhou	N 34°13.242'	E 105°35.138'	H 1590m	MT271405
Triplophysa obscura-081	Triplophysa obscura	Gansu Fisheries Research Institute	G0693	China	Gansu	Tianshui	Qinzhou	N 34°13.242'	E 105°35.138'	H 1590m	MT271405
Triplophysa obscura-082	Triplophysa obscura	Gansu Fisheries Research Institute	G0694	China	Gansu	Tianshui	Qinzhou	N 34°13.242'	E 105°35.138'	H 1590m	MT271413
Triplophysa obscura-083	Triplophysa obscura	Gansu Fisheries Research Institute	G0695	China	Gansu	Tianshui	Qinzhou	N 34°13.242'	E 105°35.138'	H 1590m	MT271406
Triplophysa obscura-084	Triplophysa obscura	Gansu Fisheries Research Institute	G0696	China	Gansu	Tianshui	Qinzhou	N 34°13.242'	E 105°35.138'	H 1590m	MT271405
Triplophysa obscura-085	Triplophysa obscura	Gansu Fisheries Research Institute	G0697	China	Gansu	Tianshui	Qinzhou	N 34°13.242'	E 105°35.138'	H 1590m	MT271406
Triplophysa obscura-219	Triplophysa obscura	Gansu Fisheries Research Institute	G0831	China	Gansu	Tianshui	Qinzhou	N 34°13.242'	E 105°35.138'	H 1590m	MT271406
Triplophysa obscura-220	Triplophysa obscura	Gansu Fisheries Research Institute	G0832	China	Gansu	Tianshui	Qinzhou	N 34°13.242'	E 105°35.138'	H 1590m	MT271406
Triplophysa obscura-222	Triplophysa obscura	Gansu Fisheries Research Institute	G0834	China	Gansu	Tianshui	Qinzhou	N 34°13.242'	E 105°35.138'	H 1590m	MT271406
Triplophysa obscura-223	Triplophysa obscura	Gansu Fisheries Research Institute	G0835	China	Gansu	Tianshui	Qinzhou	N 34°13.242'	E 105°35.138'	H 1590m	MT271413
Triplophysa obscura-224	Triplophysa obscura	Gansu Fisheries Research Institute	G0836	China	Gansu	Tianshui	Qinzhou	N 34°13.242'	E 105°35.138'	H 1590m	MT271413
Triplophysa obscura-124	Triplophysa obscura	Gansu Fisheries Research Institute	G0736	China	Gansu	Tianshui	Qinzhou	N 34°13.369'	E 105°57.765'	H 1417m	MT271412
Triplophysa obscura-231	Triplophysa obscura	Gansu Fisheries Research Institute	G0843	China	Gansu	Tianshui	Qinzhou	N 34°15.523'	E 105°54.067'	H 2018m	MT271407
Triplophysa obscura-232	Triplophysa obscura	Gansu Fisheries Research Institute	G0844	China	Gansu	Tianshui	Qinzhou	N 34°15.523'	E 105°54.067'	H 2018m	MT271407
Triplophysa obscura-233	Triplophysa obscura	Gansu Fisheries Research Institute	G0845	China	Gansu	Tianshui	Qinzhou	N 34°15.523'	E 105°54.067'	H 2018m	MT271412
Triplophysa obscura-234	Triplophysa obscura	Gansu Fisheries Research Institute	G0846	China	Gansu	Tianshui	Qinzhou	N 34°15.523'	E 105°54.067'	H 2018m	MT271406
Triplophysa obscura-023	Triplophysa obscura	Gansu Fisheries Research Institute	G0635	China	Gansu	Tianshui	Qinzhou	N 34°19.158'	E 105°36.458'	H 1565m	MT271412
Triplophysa obscura-024	Triplophysa obscura	Gansu Fisheries Research Institute	G0636	China	Gansu	Tianshui	Qinzhou	N 34°19.158'	E 105°36.458'	H 1565m	MT271407
Triplophysa obscura-025	Triplophysa obscura	Gansu Fisheries Research Institute	G0637	China	Gansu	Tianshui	Qinzhou	N 34°19.158'	E 105°36.458'	H 1565m	MT271412
Triplophysa obscura-026	Triplophysa obscura	Gansu Fisheries Research Institute	G0638	China	Gansu	Tianshui	Qinzhou	N 34°19.158'	E 105°36.458'	H 1565m	MT271412
Triplophysa obscura-027	Triplophysa obscura	Gansu Fisheries Research Institute	G0639	China	Gansu	Tianshui	Qinzhou	N 34°19.158'	E 105°36.458'	H 1565m	MT271406
Triplophysa obscura-073	Triplophysa obscura	Gansu Fisheries Research Institute	G0685	China	Gansu	Tianshui	Qinzhou	N 34°19.158'	E 105°36.458'	H 1565m	MT271407
Triplophysa obscura-074	Triplophysa obscura	Gansu Fisheries Research Institute	G0686	China	Gansu	Tianshui	Qinzhou	N 34°19.158'	E 105°36.458'	H 1565m	MT271407
Triplophysa obscura-075	Triplophysa obscura	Gansu Fisheries Research Institute	G0687	China	Gansu	Tianshui	Qinzhou	N 34°19.158'	E 105°36.458'	H 1565m	MT271407
Triplophysa obscura-158	Triplophysa obscura	Gansu Fisheries Research Institute	G0770	China	Gansu	Tianshui	Qinzhou	N 34°19.158'	E 105°36.458'	H 1565m	MT271407
Triplophysa obscura-218	Triplophysa obscura	Gansu Fisheries Research Institute	G0830	China	Gansu	Tianshui	Qinzhou	N 34°19.158'	E 105°36.458'	H 1565m	MT271412
Triplophysa obscura-196	Triplophysa obscura	Gansu Fisheries Research Institute	G0808	China	Gansu	Tianshui	Qinzhou	N 34°34.733'	E 105°10.864'	H 2100m	MT271407
Triplophysa obscura-197	Triplophysa obscura	Gansu Fisheries Research Institute	G0809	China	Gansu	Tianshui	Qinzhou	N 34°34.733'	E 105°10.864'	H 2100m	MT271427
Triplophysa obscura-230	Triplophysa obscura	Gansu Fisheries Research Institute	G0842	China	Gansu	Tianshui	Qinzhou	N 34°37.705'	E 105°21.898'	H 1512m	MT271412
Triplophysa obscura-002	Triplophysa obscura	Gansu Fisheries Research Institute	G0614	China	Gansu	Longnan	Tanchang	N 33°59.306'	E 104°22.885'	H 1894m	MT271411
Triplophysa obscura-003	Triplophysa obscura	Gansu Fisheries Research Institute	G0615	China	Gansu	Longnan	Tanchang	N 33°59.306'	E 104°22.885'	H 1894m	MT271411
Triplophysa obscura-004	Triplophysa obscura	Gansu Fisheries Research Institute	G0616	China	Gansu	Longnan	Tanchang	N 33°59.306'	E 104°22.885'	H 1894m	MT271407
Triplophysa obscura-005	Triplophysa obscura	Gansu Fisheries Research Institute	G0617	China	Gansu	Longnan	Tanchang	N 33°59.306'	E 104°22.885'	H 1894m	MT271412
Triplophysa obscura-006	Triplophysa obscura	Gansu Fisheries Research Institute	G0618	China	Gansu	Longnan	Tanchang	N 33°59.306'	E 104°22.885'	H 1894m	MT271411
Triplophysa obscura-033	Triplophysa obscura	Gansu Fisheries Research Institute	G0645	China	Gansu	Longnan	Tanchang	N 33°59.306'	E 104°22.885'	H 1894m	MT271411
Triplophysa obscura-189	Triplophysa obscura	Gansu Fisheries Research Institute	G0801	China	Gansu	Dingxi	Weiyuan	N 34°59.295'	E 104°13.612'	H 2261m	MT271412
Triplophysa obscura-190	Triplophysa obscura	Gansu Fisheries Research Institute	G0802	China	Gansu	Dingxi	Weiyuan	N 34°59.295'	E 104°13.612'	H 2261m	MT271412
Triplophysa obscura-208	Triplophysa obscura	Gansu Fisheries Research Institute	G0820	China	Gansu	Dingxi	Weiyuan	N 34°59.295'	E 104°13.612'	H 2261m	MT271412
Triplophysa obscura-229	Triplophysa obscura	Gansu Fisheries Research Institute	G0841	China	Gansu	Dingxi	Weiyuan	N 34°59.295'	E 104°13.612'	H 2261m	MT271407
Triplophysa obscura-171	Triplophysa obscura	Gansu Fisheries Research Institute	G0783	China	Gansu	Dingxi	Weiyuan	N 35°00.890'	E 104°12.790'	H 2231m	MT271412
Triplophysa obscura-172	Triplophysa obscura	Gansu Fisheries Research Institute	G0784	China	Gansu	Dingxi	Weiyuan	N 35°00.890'	E 104°12.790'	H 2231m	MT271412
Triplophysa obscura-173	Triplophysa obscura	Gansu Fisheries Research Institute	G0785	China	Gansu	Dingxi	Weiyuan	N 35°00.890'	E 104°12.790'	H 2231m	MT271412
Triplophysa obscura-174	Triplophysa obscura	Gansu Fisheries Research Institute	G0786	China	Gansu	Dingxi	Weiyuan	N 35°00.890'	E 104°12.790'	H 2231m	MT271412
Triplophysa obscura-175	Triplophysa obscura	Gansu Fisheries Research Institute	G0787	China	Gansu	Dingxi	Weiyuan	N 35°00.890'	E 104°12.790'	H 2231m	MT271412
Triplophysa obscura-191	Triplophysa obscura	Gansu Fisheries Research Institute	G0803	China	Gansu	Dingxi	Weiyuan	N 35°00.890'	E 104°12.790'	H 2231m	MT271412
Triplophysa obscura-192	Triplophysa obscura	Gansu Fisheries Research Institute	G0804	China	Gansu	Dingxi	Weiyuan	N 35°00.890'	E 104°12.790'	H 2231m	MT271412
Triplophysa obscura-205	Triplophysa obscura	Gansu Fisheries Research Institute	G0817	China	Gansu	Dingxi	Weiyuan	N 35°00.890'	E 104°12.790'	H 2231m	MT271412
Triplophysa obscura-206	Triplophysa obscura	Gansu Fisheries Research Institute	G0818	China	Gansu	Dingxi	Weiyuan	N 35°00.890'	E 104°12.790'	H 2231m	MT271409
Triplophysa obscura-207	Triplophysa obscura	Gansu Fisheries Research Institute	G0819	China	Gansu	Dingxi	Weiyuan	N 35°00.890'	E 104°12.790'	H 2231m	MT271408
Triplophysa obscura-209	Triplophysa obscura	Gansu Fisheries Research Institute	G0821	China	Gansu	Dingxi	Weiyuan	N 35°00.890'	E 104°12.790'	H 2231m	MT271411
Triplophysa obscura-210	Triplophysa obscura	Gansu Fisheries Research Institute	G0822	China	Gansu	Dingxi	Weiyuan	N 35°00.890'	E 104°12.790'	H 2231m	MT271408
Triplophysa obscura-211	Triplophysa obscura	Gansu Fisheries Research Institute	G0823	China	Gansu	Dingxi	Weiyuan	N 35°00.890'	E 104°12.790'	H 2231m	MT271411
Triplophysa obscura-212	Triplophysa obscura	Gansu Fisheries Research Institute	G0824	China	Gansu	Dingxi	Weiyuan	N 35°00.890'	E 104°12.790'	H 2231m	MT271408
Triplophysa obscura-213	Triplophysa obscura	Gansu Fisheries Research Institute	G0825	China	Gansu	Dingxi	Weiyuan	N 35°00.890'	E 104°12.790'	H 2231m	MT271408
Triplophysa obscura-214	Triplophysa obscura	Gansu Fisheries Research Institute	G0826	China	Gansu	Dingxi	Weiyuan	N 35°00.890'	E 104°12.790'	H 2231m	MT271411
Triplophysa obscura-215	Triplophysa obscura	Gansu Fisheries Research Institute	G0827	China	Gansu	Dingxi	Weiyuan	N 35°00.890'	E 104°12.790'	H 2231m	MT271408
Triplophysa obscura-216	Triplophysa obscura	Gansu Fisheries Research Institute	G0828	China	Gansu	Dingxi	Weiyuan	N 35°00.890'	E 104°12.790'	H 2231m	MT271411
Triplophysa obscura-007	Triplophysa obscura	Gansu Fisheries Research Institute	G0619	China	Gansu	Longnan	Wudu	N 33°16.390'	E 105°11.378'	H 1949m	MT271408
Triplophysa obscura-037	Triplophysa obscura	Gansu Fisheries Research Institute	G0649	China	Gansu	Longnan	Wudu	N 33°16.390'	E 105°11.378'	H 1949m	MT271408
Triplophysa obscura-181	Triplophysa obscura	Gansu Fisheries Research Institute	G0793	China	Gansu	Tianshui	Wushan	N 34°37.661'	E 104°59.538'	H 1633m	MT271408
Triplophysa obscura-203	Triplophysa obscura	Gansu Fisheries Research Institute	G0815	China	Gansu	Tianshui	Wushan	N 34°37.661'	E 104°59.538'	H 1633m	MT271411
Triplophysa obscura-038	Triplophysa obscura	Gansu Fisheries Research Institute	G0650	China	Gansu	Longnan	Xihe	N 33°48.540'	E 105°22.861'	H 1959m	MT271411
Triplophysa obscura-039	Triplophysa obscura	Gansu Fisheries Research Institute	G0651	China	Gansu	Longnan	Xihe	N 33°48.540'	E 105°22.861'	H 1959m	MT271411
Triplophysa obscura-040	Triplophysa obscura	Gansu Fisheries Research Institute	G0652	China	Gansu	Longnan	Xihe	N 33°48.540'	E 105°22.861'	H 1959m	MT271411
Triplophysa obscura-041	Triplophysa obscura	Gansu Fisheries Research Institute	G0653	China	Gansu	Longnan	Xihe	N 33°48.540'	E 105°22.861'	H 1959m	MT271411
Triplophysa obscura-201	Triplophysa obscura	Gansu Fisheries Research Institute	G0813	China	Gansu	Dingxi	Zhangxian	N 34°39.152'	E 104°30.146'	H 1825m	MT271411
Triplophysa obscura-193	Triplophysa obscura	Gansu Fisheries Research Institute	G0805	China	Gansu	Gannan	Zhuoni	N 34°59.590'	E 103°48.918'	H 2085m	MT271412
Triplophysa obscura-194	Triplophysa obscura	Gansu Fisheries Research Institute	G0806	China	Gansu	Gannan	Zhuoni	N 34°59.590'	E 103°48.918'	H 2085m	MT271412
Triplophysa obscura-195	Triplophysa obscura	Gansu Fisheries Research Institute	G0807	China	Gansu	Gannan	Zhuoni	N 34°59.590'	E 103°48.918'	H 2085m	MT271412
Triplophysa orientalis-001	Triplophysa orientalis	Gansu Fisheries Research Institute	GS0392	China	Gansu	Gannan	Hezuo	N 34°45.381'	E 103°00.675'	H 2928m	MT264970
Triplophysa orientalis-002	Triplophysa orientalis	Gansu Fisheries Research Institute	GS0393	China	Gansu	Gannan	Hezuo	N 34°45.381'	E 103°00.675'	H 2928m	MT264970
Triplophysa orientalis-003	Triplophysa orientalis	Gansu Fisheries Research Institute	GS0394	China	Gansu	Gannan	Hezuo	N 34°45.381'	E 103°00.675'	H 2928m	MT264970
Triplophysa orientalis-004	Triplophysa orientalis	Gansu Fisheries Research Institute	GS0395	China	Gansu	Gannan	Hezuo	N 34°45.381'	E 103°00.675'	H 2928m	MT264970
Triplophysa orientalis-005	Triplophysa orientalis	Gansu Fisheries Research Institute	GS0396	China	Gansu	Gannan	Hezuo	N 34°45.381'	E 103°00.675'	H 2928m	MT264970
Triplophysa orientalis-006	Triplophysa orientalis	Gansu Fisheries Research Institute	GS0397	China	Gansu	Gannan	Hezuo	N 34°45.381'	E 103°00.675'	H 2928m	MT264970
Triplophysa orientalis-007	Triplophysa orientalis	Gansu Fisheries Research Institute	GS0398	China	Gansu	Gannan	Hezuo	N 34°45.381'	E 103°00.675'	H 2928m	MT264971
Triplophysa orientalis-008	Triplophysa orientalis	Gansu Fisheries Research Institute	GS0399	China	Gansu	Gannan	Hezuo	N 34°45.381'	E 103°00.675'	H 2928m	MT264972
Triplophysa orientalis-009	Triplophysa orientalis	Gansu Fisheries Research Institute	GS0400	China	Gansu	Gannan	Hezuo	N 34°45.381'	E 103°00.675'	H 2928m	MT264973
Triplophysa orientalis-010	Triplophysa orientalis	Gansu Fisheries Research Institute	GS0401	China	Gansu	Gannan	Hezuo	N 34°45.381'	E 103°00.675'	H 2928m	MT264974
Triplophysa orientalis-011	Triplophysa orientalis	Gansu Fisheries Research Institute	GS0402	China	Gansu	Gannan	Hezuo	N 34°45.381'	E 103°00.675'	H 2928m	MT264975
Triplophysa orientalis-012	Triplophysa orientalis	Gansu Fisheries Research Institute	GS0403	China	Gansu	Gannan	Hezuo	N 34°45.381'	E 103°00.675'	H 2928m	MT264976
Triplophysa orientalis-013	Triplophysa orientalis	Gansu Fisheries Research Institute	GS0404	China	Gansu	Gannan	Hezuo	N 34°45.381'	E 103°00.675'	H 2928m	MT264977
Triplophysa orientalis-014	Triplophysa orientalis	Gansu Fisheries Research Institute	GS0405	China	Gansu	Gannan	Hezuo	N 34°45.381'	E 103°00.675'	H 2928m	MT264978
Triplophysa orientalis-015	Triplophysa orientalis	Gansu Fisheries Research Institute	GS0406	China	Gansu	Gannan	Hezuo	N 34°45.381'	E 103°00.675'	H 2928m	MT264979
Triplophysa orientalis-016	Triplophysa orientalis	Gansu Fisheries Research Institute	GS0407	China	Gansu	Gannan	Hezuo	N 34°45.381'	E 103°00.675'	H 2928m	MT264980
Triplophysa orientalis-017	Triplophysa orientalis	Gansu Fisheries Research Institute	GS0408	China	Gansu	Gannan	Hezuo	N 34°45.381'	E 103°00.675'	H 2928m	MT264981
Triplophysa orientalis-018	Triplophysa orientalis	Gansu Fisheries Research Institute	GS0409	China	Gansu	Gannan	Hezuo	N 34°45.381'	E 103°00.675'	H 2928m	MT264982
Triplophysa orientalis-019	Triplophysa orientalis	Gansu Fisheries Research Institute	GS0410	China	Gansu	Gannan	Hezuo	N 34°45.381'	E 103°00.675'	H 2928m	MT264983
Triplophysa papillosolabiatus-025	Triplophysa papillosolabiatus	Gansu Fisheries Research Institute	GS0304	China	Gansu	Jiuquan	Akesai	N 38°51.324'	E 95° 5.633'	H 3280m	MT271440
Triplophysa papillosolabiatus-026	Triplophysa papillosolabiatus	Gansu Fisheries Research Institute	GS0305	China	Gansu	Jiuquan	Akesai	N 38°51.324'	E 95° 5.633'	H 3280m	MT271440
Triplophysa papillosolabiatus-027	Triplophysa papillosolabiatus	Gansu Fisheries Research Institute	GS0306	China	Gansu	Jiuquan	Akesai	N 38°51.324'	E 95° 5.633'	H 3280m	MT271440
Triplophysa papillosolabiatus-028	Triplophysa papillosolabiatus	Gansu Fisheries Research Institute	GS0307	China	Gansu	Jiuquan	Akesai	N 38°51.324'	E 95° 5.633'	H 3280m	MT271440
Triplophysa papillosolabiatus-029	Triplophysa papillosolabiatus	Gansu Fisheries Research Institute	GS0308	China	Gansu	Jiuquan	Akesai	N 38°51.324'	E 95° 5.633'	H 3280m	MT271439
Triplophysa papillosolabiatus-030	Triplophysa papillosolabiatus	Gansu Fisheries Research Institute	GS0309	China	Gansu	Jiuquan	Akesai	N 38°51.324'	E 95° 5.633'	H 3280m	MT271439
Triplophysa papillosolabiatus-047	Triplophysa papillosolabiatus	Gansu Fisheries Research Institute	GS0326	China	Gansu	Jiuquan	Akesai	N 38°51.324'	E 95° 5.633'	H 3280m	MT271439
Triplophysa papillosolabiatus-089	Triplophysa papillosolabiatus	Gansu Fisheries Research Institute	GS0368	China	Gansu	Jiuquan	Akesai	N 38°51.324'	E 95° 5.633'	H 3280m	MT271439
Triplophysa papillosolabiatus-001	Triplophysa papillosolabiatus	Gansu Fisheries Research Institute	GS0280	China	Gansu	Jiuquan	Akesai	N 39°02.364'	E 94°10.523'	H 2807m	MT271439
Triplophysa papillosolabiatus-002	Triplophysa papillosolabiatus	Gansu Fisheries Research Institute	GS0281	China	Gansu	Jiuquan	Akesai	N 39°02.364'	E 94°10.523'	H 2807m	MT271431
Triplophysa papillosolabiatus-003	Triplophysa papillosolabiatus	Gansu Fisheries Research Institute	GS0282	China	Gansu	Jiuquan	Akesai	N 39°02.364'	E 94°10.523'	H 2807m	MT271440
Triplophysa papillosolabiatus-004	Triplophysa papillosolabiatus	Gansu Fisheries Research Institute	GS0283	China	Gansu	Jiuquan	Akesai	N 39°02.364'	E 94°10.523'	H 2807m	MT271439
Triplophysa papillosolabiatus-005	Triplophysa papillosolabiatus	Gansu Fisheries Research Institute	GS0284	China	Gansu	Jiuquan	Akesai	N 39°02.364'	E 94°10.523'	H 2807m	MT271440
Triplophysa papillosolabiatus-006	Triplophysa papillosolabiatus	Gansu Fisheries Research Institute	GS0285	China	Gansu	Jiuquan	Akesai	N 39°02.364'	E 94°10.523'	H 2807m	MT271439
Triplophysa papillosolabiatus-007	Triplophysa papillosolabiatus	Gansu Fisheries Research Institute	GS0286	China	Gansu	Jiuquan	Akesai	N 39°02.364'	E 94°10.523'	H 2807m	MT271440
Triplophysa papillosolabiatus-008	Triplophysa papillosolabiatus	Gansu Fisheries Research Institute	GS0287	China	Gansu	Jiuquan	Akesai	N 39°02.364'	E 94°10.523'	H 2807m	MT271440
Triplophysa papillosolabiatus-009	Triplophysa papillosolabiatus	Gansu Fisheries Research Institute	GS0288	China	Gansu	Jiuquan	Akesai	N 39°02.364'	E 94°10.523'	H 2807m	MT271440
Triplophysa papillosolabiatus-010	Triplophysa papillosolabiatus	Gansu Fisheries Research Institute	GS0289	China	Gansu	Jiuquan	Akesai	N 39°02.364'	E 94°10.523'	H 2807m	MT271440
Triplophysa papillosolabiatus-011	Triplophysa papillosolabiatus	Gansu Fisheries Research Institute	GS0290	China	Gansu	Jiuquan	Akesai	N 39°02.364'	E 94°10.523'	H 2807m	MT271440
Triplophysa papillosolabiatus-012	Triplophysa papillosolabiatus	Gansu Fisheries Research Institute	GS0291	China	Gansu	Jiuquan	Akesai	N 39°02.364'	E 94°10.523'	H 2807m	MT271439
Triplophysa papillosolabiatus-013	Triplophysa papillosolabiatus	Gansu Fisheries Research Institute	GS0292	China	Gansu	Jiuquan	Akesai	N 39°02.364'	E 94°10.523'	H 2807m	MT271440
Triplophysa papillosolabiatus-014	Triplophysa papillosolabiatus	Gansu Fisheries Research Institute	GS0293	China	Gansu	Jiuquan	Akesai	N 39°02.364'	E 94°10.523'	H 2807m	MT271439
Triplophysa papillosolabiatus-015	Triplophysa papillosolabiatus	Gansu Fisheries Research Institute	GS0294	China	Gansu	Jiuquan	Akesai	N 39°02.364'	E 94°10.523'	H 2807m	MT271439
Triplophysa papillosolabiatus-016	Triplophysa papillosolabiatus	Gansu Fisheries Research Institute	GS0295	China	Gansu	Jiuquan	Akesai	N 39°02.364'	E 94°10.523'	H 2807m	MT271440
Triplophysa papillosolabiatus-017	Triplophysa papillosolabiatus	Gansu Fisheries Research Institute	GS0296	China	Gansu	Jiuquan	Akesai	N 39°02.364'	E 94°10.523'	H 2807m	MT271439
Triplophysa papillosolabiatus-018	Triplophysa papillosolabiatus	Gansu Fisheries Research Institute	GS0297	China	Gansu	Jiuquan	Akesai	N 39°02.364'	E 94°10.523'	H 2807m	MT271440
Triplophysa papillosolabiatus-019	Triplophysa papillosolabiatus	Gansu Fisheries Research Institute	GS0298	China	Gansu	Jiuquan	Akesai	N 39°02.364'	E 94°10.523'	H 2807m	MT271440
Triplophysa papillosolabiatus-020	Triplophysa papillosolabiatus	Gansu Fisheries Research Institute	GS0299	China	Gansu	Jiuquan	Akesai	N 39°02.364'	E 94°10.523'	H 2807m	MT271440
Triplophysa papillosolabiatus-021	Triplophysa papillosolabiatus	Gansu Fisheries Research Institute	GS0300	China	Gansu	Jiuquan	Akesai	N 39°02.364'	E 94°10.523'	H 2807m	MT271440
Triplophysa papillosolabiatus-022	Triplophysa papillosolabiatus	Gansu Fisheries Research Institute	GS0301	China	Gansu	Jiuquan	Akesai	N 39°02.364'	E 94°10.523'	H 2807m	MT271440
Triplophysa papillosolabiatus-023	Triplophysa papillosolabiatus	Gansu Fisheries Research Institute	GS0302	China	Gansu	Jiuquan	Akesai	N 39°02.364'	E 94°10.523'	H 2807m	MT271440
Triplophysa papillosolabiatus-024	Triplophysa papillosolabiatus	Gansu Fisheries Research Institute	GS0303	China	Gansu	Jiuquan	Akesai	N 39°02.364'	E 94°10.523'	H 2807m	MT271440
Triplophysa papillosolabiatus-088	Triplophysa papillosolabiatus	Gansu Fisheries Research Institute	GS0367	China	Gansu	Jiuquan	Akesai	N 39°02.364'	E 94°10.523'	H 2807m	MT271440
Triplophysa papillosolabiatus-033	Triplophysa papillosolabiatus	Gansu Fisheries Research Institute	GS0312	China	Qinghai	Haibei	Menyuan	N 37°27.445'	E 101°25.495'	H 2934m	MT271442
Triplophysa papillosolabiatus-070	Triplophysa papillosolabiatus	Gansu Fisheries Research Institute	GS0349	China	Qinghai	Haibei	Qilian	N 38° 1.717'	E 100°34.948'	H 3076m	MT271441
Triplophysa papillosolabiatus-071	Triplophysa papillosolabiatus	Gansu Fisheries Research Institute	GS0350	China	Qinghai	Haibei	Qilian	N 38° 1.717'	E 100°34.948'	H 3076m	MT271439
Triplophysa papillosolabiatus-072	Triplophysa papillosolabiatus	Gansu Fisheries Research Institute	GS0351	China	Qinghai	Haibei	Qilian	N 38° 1.717'	E 100°34.948'	H 3076m	MT271441
Triplophysa papillosolabiatus-073	Triplophysa papillosolabiatus	Gansu Fisheries Research Institute	GS0352	China	Qinghai	Haibei	Qilian	N 38° 1.717'	E 100°34.948'	H 3076m	MT271439
Triplophysa papillosolabiatus-074	Triplophysa papillosolabiatus	Gansu Fisheries Research Institute	GS0353	China	Qinghai	Haibei	Qilian	N 38° 1.717'	E 100°34.948'	H 3076m	MT271440
Triplophysa papillosolabiatus-075	Triplophysa papillosolabiatus	Gansu Fisheries Research Institute	GS0354	China	Qinghai	Haibei	Qilian	N 38°25.501'	E 99°34.956'	H 3263m	MT271440
Triplophysa papillosolabiatus-076	Triplophysa papillosolabiatus	Gansu Fisheries Research Institute	GS0355	China	Qinghai	Haibei	Qilian	N 38°25.501'	E 99°34.956'	H 3263m	MT271430
Triplophysa papillosolabiatus-077	Triplophysa papillosolabiatus	Gansu Fisheries Research Institute	GS0356	China	Qinghai	Haibei	Qilian	N 38°25.501'	E 99°34.956'	H 3263m	MT271439
Triplophysa papillosolabiatus-079	Triplophysa papillosolabiatus	Gansu Fisheries Research Institute	GS0358	China	Qinghai	Haibei	Qilian	N 38°25.501'	E 99°34.956'	H 3263m	MT271440
Triplophysa papillosolabiatus-080	Triplophysa papillosolabiatus	Gansu Fisheries Research Institute	GS0359	China	Qinghai	Haibei	Qilian	N 38°25.501'	E 99°34.956'	H 3263m	MT271440
Triplophysa papillosolabiatus-081	Triplophysa papillosolabiatus	Gansu Fisheries Research Institute	GS0360	China	Qinghai	Haibei	Qilian	N 38°25.501'	E 99°34.956'	H 3263m	MT271439
Triplophysa papillosolabiatus-082	Triplophysa papillosolabiatus	Gansu Fisheries Research Institute	GS0361	China	Qinghai	Haibei	Qilian	N 38°25.501'	E 99°34.956'	H 3263m	MT271440
Triplophysa papillosolabiatus-045	Triplophysa papillosolabiatus	Gansu Fisheries Research Institute	GS0324	China	Gansu	Zhangye	Qilian	N 39°08.376'	E 100°23.839'	H 1412m	MT271440
Triplophysa papillosolabiatus-048	Triplophysa papillosolabiatus	Gansu Fisheries Research Institute	GS0327	China	Qinghai	Haibei	Qilian	N 38°42.150'	E 98° 0.669'	H 3651m	MT271440
Triplophysa papillosolabiatus-049	Triplophysa papillosolabiatus	Gansu Fisheries Research Institute	GS0328	China	Qinghai	Haibei	Qilian	N 38°42.150'	E 98° 0.669'	H 3651m	MT271439
Triplophysa papillosolabiatus-050	Triplophysa papillosolabiatus	Gansu Fisheries Research Institute	GS0329	China	Qinghai	Haibei	Qilian	N 38°42.150'	E 98° 0.669'	H 3651m	MT271432
Triplophysa papillosolabiatus-051	Triplophysa papillosolabiatus	Gansu Fisheries Research Institute	GS0330	China	Qinghai	Haibei	Qilian	N 38°42.150'	E 98° 0.669'	H 3651m	MT271439
Triplophysa papillosolabiatus-052	Triplophysa papillosolabiatus	Gansu Fisheries Research Institute	GS0331	China	Qinghai	Haibei	Qilian	N 38°42.150'	E 98° 0.669'	H 3651m	MT271440
Triplophysa papillosolabiatus-053	Triplophysa papillosolabiatus	Gansu Fisheries Research Institute	GS0332	China	Qinghai	Haibei	Qilian	N 38°42.150'	E 98° 0.669'	H 3651m	MT271440
Triplophysa papillosolabiatus-054	Triplophysa papillosolabiatus	Gansu Fisheries Research Institute	GS0333	China	Qinghai	Haibei	Qilian	N 38°42.150'	E 98° 0.669'	H 3651m	MT271439
Triplophysa papillosolabiatus-055	Triplophysa papillosolabiatus	Gansu Fisheries Research Institute	GS0334	China	Qinghai	Haibei	Qilian	N 38°42.150'	E 98° 0.669'	H 3651m	MT271440
Triplophysa papillosolabiatus-056	Triplophysa papillosolabiatus	Gansu Fisheries Research Institute	GS0335	China	Qinghai	Haibei	Qilian	N 38°42.150'	E 98° 0.669'	H 3651m	MT271440
Triplophysa papillosolabiatus-057	Triplophysa papillosolabiatus	Gansu Fisheries Research Institute	GS0336	China	Qinghai	Haibei	Qilian	N 38°42.150'	E 98° 0.669'	H 3651m	MT271439
Triplophysa papillosolabiatus-058	Triplophysa papillosolabiatus	Gansu Fisheries Research Institute	GS0337	China	Qinghai	Haibei	Qilian	N 38°42.150'	E 98° 0.669'	H 3651m	MT271440
Triplophysa papillosolabiatus-059	Triplophysa papillosolabiatus	Gansu Fisheries Research Institute	GS0338	China	Qinghai	Haibei	Qilian	N 38°42.150'	E 98° 0.669'	H 3651m	MT271440
Triplophysa papillosolabiatus-060	Triplophysa papillosolabiatus	Gansu Fisheries Research Institute	GS0339	China	Qinghai	Haibei	Qilian	N 38°42.150'	E 98° 0.669'	H 3651m	MT271440
Triplophysa papillosolabiatus-090	Triplophysa papillosolabiatus	Gansu Fisheries Research Institute	GS0369	China	Qinghai	Haibei	Qilian	N 38°42.150'	E 98° 0.669'	H 3651m	MT271433
Triplophysa papillosolabiatus-078	Triplophysa papillosolabiatus	Gansu Fisheries Research Institute	GS0357	China	Gansu	Zhangye	Sunan	N 38°38.112'	E 100°07.455'	H 2268m	MT271439
Triplophysa papillosolabiatus-083	Triplophysa papillosolabiatus	Gansu Fisheries Research Institute	GS0362	China	Gansu	Zhangye	Sunan	N 38°38.112'	E 100°07.455'	H 2268m	MT271439
Triplophysa papillosolabiatus-061	Triplophysa papillosolabiatus	Gansu Fisheries Research Institute	GS0340	China	Qinghai	Haibei	Yanglong	N 38°48.872'	E 98°24.702'	H 3364m	MT271439
Triplophysa papillosolabiatus-062	Triplophysa papillosolabiatus	Gansu Fisheries Research Institute	GS0341	China	Qinghai	Haibei	Yanglong	N 38°48.872'	E 98°24.702'	H 3364m	MT271439
Triplophysa papillosolabiatus-063	Triplophysa papillosolabiatus	Gansu Fisheries Research Institute	GS0342	China	Qinghai	Haibei	Yanglong	N 38°48.872'	E 98°24.702'	H 3364m	MT271440
Triplophysa papillosolabiatus-064	Triplophysa papillosolabiatus	Gansu Fisheries Research Institute	GS0343	China	Qinghai	Haibei	Yanglong	N 38°48.872'	E 98°24.702'	H 3364m	MT271440
Triplophysa papillosolabiatus-065	Triplophysa papillosolabiatus	Gansu Fisheries Research Institute	GS0344	China	Qinghai	Haibei	Yanglong	N 38°48.872'	E 98°24.702'	H 3364m	MT271439
Triplophysa papillosolabiatus-066	Triplophysa papillosolabiatus	Gansu Fisheries Research Institute	GS0345	China	Qinghai	Haibei	Yanglong	N 38°48.872'	E 98°24.702'	H 3364m	MT271434
Triplophysa papillosolabiatus-067	Triplophysa papillosolabiatus	Gansu Fisheries Research Institute	GS0346	China	Qinghai	Haibei	Yanglong	N 38°48.872'	E 98°24.702'	H 3364m	MT271439
Triplophysa papillosolabiatus-068	Triplophysa papillosolabiatus	Gansu Fisheries Research Institute	GS0347	China	Qinghai	Haibei	Yanglong	N 38°48.872'	E 98°24.702'	H 3364m	MT271436
Triplophysa papillosolabiatus-069	Triplophysa papillosolabiatus	Gansu Fisheries Research Institute	GS0348	China	Qinghai	Haibei	Yanglong	N 38°48.872'	E 98°24.702'	H 3364m	MT271439
Triplophysa papillosolabiatus-091	Triplophysa papillosolabiatus	Gansu Fisheries Research Institute	GS0370	China	Qinghai	Haibei	Yanglong	N 38°48.872'	E 98°24.702'	H 3364m	MT271435
Triplophysa papillosolabiatus-092	Triplophysa papillosolabiatus	Gansu Fisheries Research Institute	GS0371	China	Qinghai	Haibei	Yanglong	N 38°48.872'	E 98°24.702'	H 3364m	MT271440
Triplophysa papillosolabiatus-093	Triplophysa papillosolabiatus	Gansu Fisheries Research Institute	GS0372	China	Qinghai	Haibei	Yanglong	N 38°48.872'	E 98°24.702'	H 3364m	MT271440
Triplophysa papillosolabiatus-031	Triplophysa papillosolabiatus	Gansu Fisheries Research Institute	GS0310	China	Gansu	Jinchang	Yongchang	N 38°19.887'	E 102° 1.632'	H 1827m	MT271440
Triplophysa papillosolabiatus-032	Triplophysa papillosolabiatus	Gansu Fisheries Research Institute	GS0311	China	Gansu	Jinchang	Yongchang	N 38°19.887'	E 102° 1.632'	H 1827m	MT271437
Triplophysa papillosolabiatus-094	Triplophysa papillosolabiatus	Gansu Fisheries Research Institute	GS0373	China	Gansu	Jinchang	Yongchang	N 38°19.887'	E 102° 1.632'	H 1827m	MT271438
Triplophysa papillosolabiatus-095	Triplophysa papillosolabiatus	Gansu Fisheries Research Institute	GS0374	China	Gansu	Jinchang	Yongchang	N 38°19.887'	E 102° 1.632'	H 1827m	MT271439
Triplophysa papillosolabiatus-034	Triplophysa papillosolabiatus	Gansu Fisheries Research Institute	GS0313	China	Gansu	Jiuquan	Yumen	N 39°52.098'	E 96°44.983'	H 2054m	MT271440
Triplophysa papillosolabiatus-035	Triplophysa papillosolabiatus	Gansu Fisheries Research Institute	GS0314	China	Gansu	Jiuquan	Yumen	N 39°52.098'	E 96°44.983'	H 2054m	MT271440
Triplophysa papillosolabiatus-036	Triplophysa papillosolabiatus	Gansu Fisheries Research Institute	GS0315	China	Gansu	Jiuquan	Yumen	N 39°52.098'	E 96°44.983'	H 2054m	MT271439
Triplophysa papillosolabiatus-037	Triplophysa papillosolabiatus	Gansu Fisheries Research Institute	GS0316	China	Gansu	Jiuquan	Yumen	N 39°52.098'	E 96°44.983'	H 2054m	MT271440
Triplophysa papillosolabiatus-038	Triplophysa papillosolabiatus	Gansu Fisheries Research Institute	GS0317	China	Gansu	Jiuquan	Yumen	N 39°52.098'	E 96°44.983'	H 2054m	MT271440
Triplophysa papillosolabiatus-039	Triplophysa papillosolabiatus	Gansu Fisheries Research Institute	GS0318	China	Gansu	Jiuquan	Yumen	N 39°52.098'	E 96°44.983'	H 2054m	MT271439
Triplophysa papillosolabiatus-040	Triplophysa papillosolabiatus	Gansu Fisheries Research Institute	GS0319	China	Gansu	Jiuquan	Yumen	N 39°52.098'	E 96°44.983'	H 2054m	MT271440
Triplophysa papillosolabiatus-041	Triplophysa papillosolabiatus	Gansu Fisheries Research Institute	GS0320	China	Gansu	Jiuquan	Yumen	N 39°52.098'	E 96°44.983'	H 2054m	MT271439
Triplophysa papillosolabiatus-042	Triplophysa papillosolabiatus	Gansu Fisheries Research Institute	GS0321	China	Gansu	Jiuquan	Yumen	N 39°52.098'	E 96°44.983'	H 2054m	MT271440
Triplophysa papillosolabiatus-043	Triplophysa papillosolabiatus	Gansu Fisheries Research Institute	GS0322	China	Gansu	Jiuquan	Yumen	N 39°52.098'	E 96°44.983'	H 2054m	MT271440
Triplophysa papillosolabiatus-044	Triplophysa papillosolabiatus	Gansu Fisheries Research Institute	GS0323	China	Gansu	Jiuquan	Yumen	N 39°52.098'	E 96°44.983'	H 2054m	MT271439
Triplophysa papillosolabiatus-046	Triplophysa papillosolabiatus	Gansu Fisheries Research Institute	GS0325	China	Gansu	Jiuquan	Yumen	N 39°52.098'	E 96°44.983'	H 2054m	MT271440
Triplophysa papillosolabiatus-084	Triplophysa papillosolabiatus	Gansu Fisheries Research Institute	GS0363	China	Gansu	Jiuquan	Yumen	N 39°52.098'	E 96°44.983'	H 2054m	MT271440
Triplophysa papillosolabiatus-085	Triplophysa papillosolabiatus	Gansu Fisheries Research Institute	GS0364	China	Gansu	Jiuquan	Yumen	N 39°52.098'	E 96°44.983'	H 2054m	MT271439
Triplophysa papillosolabiatus-086	Triplophysa papillosolabiatus	Gansu Fisheries Research Institute	GS0365	China	Gansu	Jiuquan	Yumen	N 39°52.098'	E 96°44.983'	H 2054m	MT271440
Triplophysa papillosolabiatus-087	Triplophysa papillosolabiatus	Gansu Fisheries Research Institute	GS0366	China	Gansu	Jiuquan	Yumen	N 39°52.098'	E 96°44.983'	H 2054m	MT271440
Triplophysa pappenheimi-021	Triplophysa pappenheimi	Gansu Fisheries Research Institute	G0867	China	Gansu	Linxia	Linxia	N 35°28.278'	E 103° 2.238'	H 2076m	MT271447
Triplophysa pappenheimi-003	Triplophysa pappenheimi	Gansu Fisheries Research Institute	G0849	China	Gansu	Gannan	Luqu	N 34°10.885'	E 102°12.026'	H 3556m	MT271537
Triplophysa pappenheimi-004	Triplophysa pappenheimi	Gansu Fisheries Research Institute	G0850	China	Gansu	Dingxi	Minxian	N 34°24.162'	E 104°04.066'	H 2345m	MT271447
Triplophysa pappenheimi-005	Triplophysa pappenheimi	Gansu Fisheries Research Institute	G0851	China	Gansu	Dingxi	Minxian	N 34°24.162'	E 104°04.066'	H 2345m	MT271447
Triplophysa pappenheimi-006	Triplophysa pappenheimi	Gansu Fisheries Research Institute	G0852	China	Gansu	Dingxi	Minxian	N 34°24.162'	E 104°04.066'	H 2345m	MT271447
Triplophysa pappenheimi-007	Triplophysa pappenheimi	Gansu Fisheries Research Institute	G0853	China	Gansu	Dingxi	Minxian	N 34°24.162'	E 104°04.066'	H 2345m	MT271447
Triplophysa pappenheimi-008	Triplophysa pappenheimi	Gansu Fisheries Research Institute	G0854	China	Gansu	Dingxi	Minxian	N 34°24.162'	E 104°04.066'	H 2345m	MT271537
Triplophysa pappenheimi-009	Triplophysa pappenheimi	Gansu Fisheries Research Institute	G0855	China	Gansu	Dingxi	Minxian	N 34°24.162'	E 104°04.066'	H 2345m	MT271447
Triplophysa pappenheimi-010	Triplophysa pappenheimi	Gansu Fisheries Research Institute	G0856	China	Gansu	Dingxi	Minxian	N 34°24.162'	E 104°04.066'	H 2345m	MT271447
Triplophysa pappenheimi-002	Triplophysa pappenheimi	Gansu Fisheries Research Institute	G0848	China	Gansu	Baiyin	Wufo	N 37°20.509'	E 104°23.686'	H 2115m	MT271388
Triplophysa pappenheimi-011	Triplophysa pappenheimi	Gansu Fisheries Research Institute	G0857	China	Gansu	Baiyin	Wufo	N 37°20.509'	E 104°23.686'	H 2115m	MT271447
Triplophysa pappenheimi-012	Triplophysa pappenheimi	Gansu Fisheries Research Institute	G0858	China	Gansu	Baiyin	Wufo	N 37°20.509'	E 104°23.686'	H 2115m	MT271447
Triplophysa pappenheimi-013	Triplophysa pappenheimi	Gansu Fisheries Research Institute	G0859	China	Gansu	Baiyin	Wufo	N 37°20.509'	E 104°23.686'	H 2115m	MT271447
Triplophysa pappenheimi-014	Triplophysa pappenheimi	Gansu Fisheries Research Institute	G0860	China	Gansu	Baiyin	Wufo	N 37°20.509'	E 104°23.686'	H 2115m	MT271378
Triplophysa pappenheimi-015	Triplophysa pappenheimi	Gansu Fisheries Research Institute	G0861	China	Gansu	Baiyin	Wufo	N 37°20.509'	E 104°23.686'	H 2115m	MT271447
Triplophysa pappenheimi-016	Triplophysa pappenheimi	Gansu Fisheries Research Institute	G0862	China	Gansu	Baiyin	Wufo	N 37°20.509'	E 104°23.686'	H 2115m	MT271447
Triplophysa pappenheimi-017	Triplophysa pappenheimi	Gansu Fisheries Research Institute	G0863	China	Gansu	Baiyin	Wufo	N 37°20.509'	E 104°23.686'	H 2115m	MT271447
Triplophysa pappenheimi-018	Triplophysa pappenheimi	Gansu Fisheries Research Institute	G0864	China	Gansu	Baiyin	Wufo	N 37°20.509'	E 104°23.686'	H 2115m	MT271393
Triplophysa pappenheimi-019	Triplophysa pappenheimi	Gansu Fisheries Research Institute	G0865	China	Gansu	Baiyin	Wufo	N 37°20.509'	E 104°23.686'	H 2115m	MT271393
Triplophysa pappenheimi-020	Triplophysa pappenheimi	Gansu Fisheries Research Institute	G0866	China	Gansu	Baiyin	Wufo	N 37°20.509'	E 104°23.686'	H 2115m	MT271385
Triplophysa pappenheimi-001	Triplophysa pappenheimi	Gansu Fisheries Research Institute	G0847	China	Gansu	Lanzhou	Yuzhong	N 35°51.857'	E 104°00.827'	H 2094m	MT271537
Triplophysa polyfasciata-001	Triplophysa polyfasciata	Gansu Fisheries Research Institute	G0185	China	Gansu	Longnan	Liangdang	N 33°55.939'	E 106°25.613'	H 1891m	MT271448
Triplophysa polyfasciata-002	Triplophysa polyfasciata	Gansu Fisheries Research Institute	G0186	China	Gansu	Longnan	Liangdang	N 33°55.939'	E 106°25.613'	H 1891m	MT271448
Triplophysa polyfasciata-003	Triplophysa polyfasciata	Gansu Fisheries Research Institute	G0187	China	Gansu	Longnan	Liangdang	N 33°55.939'	E 106°25.613'	H 1891m	MT271448
Triplophysa polyfasciata-004	Triplophysa polyfasciata	Gansu Fisheries Research Institute	G0188	China	Gansu	Longnan	Liangdang	N 33°55.939'	E 106°25.613'	H 1891m	MT271449
Triplophysa polyfasciata-005	Triplophysa polyfasciata	Gansu Fisheries Research Institute	G0189	China	Gansu	Longnan	Liangdang	N 33°55.939'	E 106°25.613'	H 1891m	MT271449
Triplophysa polyfasciata-006	Triplophysa polyfasciata	Gansu Fisheries Research Institute	G0190	China	Gansu	Longnan	Liangdang	N 33°55.940'	E 106°25.614'	H 1908m	MT271449
Triplophysa polyfasciata-007	Triplophysa polyfasciata	Gansu Fisheries Research Institute	G0191	China	Gansu	Longnan	Liangdang	N 33°55.940'	E 106°25.614'	H 1908m	MT271449
Triplophysa polyfasciata-008	Triplophysa polyfasciata	Gansu Fisheries Research Institute	G0192	China	Gansu	Longnan	Liangdang	N 33°55.940'	E 106°25.614'	H 1908m	MT271449
Triplophysa polyfasciata-009	Triplophysa polyfasciata	Gansu Fisheries Research Institute	G0193	China	Gansu	Longnan	Liangdang	N 33°55.940'	E 106°25.614'	H 1908m	MT271449
Triplophysa polyfasciata-010	Triplophysa polyfasciata	Gansu Fisheries Research Institute	G0194	China	Gansu	Longnan	Wudu	N 33°16.390'	E 105°11.378'	H 1949m	MT271450
Triplophysa pseudoscleroptera-001	Triplophysa pseudoscleroptera	Gansu Fisheries Research Institute	GS0216	China	Gansu	Gannan	Xiahe	N 35° 6.551'	E 102°24.925'	H 3065m	MT271451
Triplophysa pseudoscleroptera-002	Triplophysa pseudoscleroptera	Gansu Fisheries Research Institute	GS0217	China	Gansu	Gannan	Xiahe	N 35°21.832'	E 102°52.734'	H 2304m	MT271452
Triplophysa pseudoscleroptera-003	Triplophysa pseudoscleroptera	Gansu Fisheries Research Institute	GS0218	China	Gansu	Gannan	Xiahe	N 35°21.832'	E 102°52.734'	H 2304m	MT271453
Triplophysa pseudoscleroptera-004	Triplophysa pseudoscleroptera	Gansu Fisheries Research Institute	GS0219	China	Gansu	Linxia	Yongjing	N 35°49.630'	E 103°09.113'	H 1729m	MT271453
Triplophysa pseudoscleroptera-005	Triplophysa pseudoscleroptera	Gansu Fisheries Research Institute	GS0220	China	Gansu	Linxia	Yongjing	N 35°49.630'	E 103°09.113'	H 1729m	MT271453
Triplophysa pseudoscleroptera-006	Triplophysa pseudoscleroptera	Gansu Fisheries Research Institute	GS0221	China	Gansu	Linxia	Yongjing	N 35°49.630'	E 103°09.113'	H 1729m	MT271453
Triplophysa pseudoscleroptera-007	Triplophysa pseudoscleroptera	Gansu Fisheries Research Institute	GS0222	China	Gansu	Linxia	Yongjing	N 35°49.630'	E 103°09.113'	H 1729m	MT271453
Triplophysa pseudoscleroptera-008	Triplophysa pseudoscleroptera	Gansu Fisheries Research Institute	GS0223	China	Gansu	Linxia	Yongjing	N 35°49.630'	E 103°09.113'	H 1729m	MT271453
Triplophysa pseudoscleroptera-009	Triplophysa pseudoscleroptera	Gansu Fisheries Research Institute	GS0224	China	Gansu	Linxia	Yongjing	N 35°49.630'	E 103°09.113'	H 1729m	MT271454
Triplophysa robusta-187	Triplophysa robusta	Gansu Fisheries Research Institute	G0386	China	Gansu	Pingliang	Chongxin	N 35°10.769'	E 107°02.760'	H 1181m	MT271475
Triplophysa robusta-013	Triplophysa robusta	Gansu Fisheries Research Institute	G0212	China	Gansu	Gannan	Diebu	N 34°00.677'	E 103°24.706'	H 2046m	MT271475
Triplophysa robusta-043	Triplophysa robusta	Gansu Fisheries Research Institute	G0242	China	Gansu	Gannan	Diebu	N 34°00.677'	E 103°24.706'	H 2046m	MT271475
Triplophysa robusta-044	Triplophysa robusta	Gansu Fisheries Research Institute	G0243	China	Gansu	Gannan	Diebu	N 34°00.677'	E 103°24.706'	H 2046m	MT271475
Triplophysa robusta-045	Triplophysa robusta	Gansu Fisheries Research Institute	G0244	China	Gansu	Gannan	Diebu	N 34°00.677'	E 103°24.706'	H 2046m	MT271475
Triplophysa robusta-046	Triplophysa robusta	Gansu Fisheries Research Institute	G0245	China	Gansu	Gannan	Diebu	N 34°00.677'	E 103°24.706'	H 2046m	MT271475
Triplophysa robusta-074	Triplophysa robusta	Gansu Fisheries Research Institute	G0273	China	Gansu	Gannan	Diebu	N 34°00.677'	E 103°24.706'	H 2046m	MT271458
Triplophysa robusta-075	Triplophysa robusta	Gansu Fisheries Research Institute	G0274	China	Gansu	Gannan	Diebu	N 34°00.677'	E 103°24.706'	H 2046m	MT271458
Triplophysa robusta-076	Triplophysa robusta	Gansu Fisheries Research Institute	G0275	China	Gansu	Gannan	Diebu	N 34°00.677'	E 103°24.706'	H 2046m	MT271475
Triplophysa robusta-077	Triplophysa robusta	Gansu Fisheries Research Institute	G0276	China	Gansu	Gannan	Diebu	N 34°00.677'	E 103°24.706'	H 2046m	MT271475
Triplophysa robusta-078	Triplophysa robusta	Gansu Fisheries Research Institute	G0277	China	Gansu	Gannan	Diebu	N 34°00.677'	E 103°24.706'	H 2046m	MT271458
Triplophysa robusta-079	Triplophysa robusta	Gansu Fisheries Research Institute	G0278	China	Gansu	Gannan	Diebu	N 34°00.677'	E 103°24.706'	H 2046m	MT271475
Triplophysa robusta-080	Triplophysa robusta	Gansu Fisheries Research Institute	G0279	China	Gansu	Gannan	Diebu	N 34°00.677'	E 103°24.706'	H 2046m	MT271515
Triplophysa robusta-081	Triplophysa robusta	Gansu Fisheries Research Institute	G0280	China	Gansu	Gannan	Diebu	N 34°00.677'	E 103°24.706'	H 2046m	MT271458
Triplophysa robusta-082	Triplophysa robusta	Gansu Fisheries Research Institute	G0281	China	Gansu	Gannan	Diebu	N 34°00.677'	E 103°24.706'	H 2046m	MT271458
Triplophysa robusta-083	Triplophysa robusta	Gansu Fisheries Research Institute	G0282	China	Gansu	Gannan	Diebu	N 34°00.677'	E 103°24.706'	H 2046m	MT271475
Triplophysa robusta-086	Triplophysa robusta	Gansu Fisheries Research Institute	G0285	China	Gansu	Gannan	Diebu	N 34°00.677'	E 103°24.706'	H 2046m	MT271475
Triplophysa robusta-087	Triplophysa robusta	Gansu Fisheries Research Institute	G0286	China	Gansu	Gannan	Diebu	N 34°00.677'	E 103°24.706'	H 2046m	MT271458
Triplophysa robusta-088	Triplophysa robusta	Gansu Fisheries Research Institute	G0287	China	Gansu	Gannan	Diebu	N 34°00.677'	E 103°24.706'	H 2046m	MT271475
Triplophysa robusta-093	Triplophysa robusta	Gansu Fisheries Research Institute	G0292	China	Gansu	Gannan	Diebu	N 34°00.677'	E 103°24.706'	H 2046m	MT271475
Triplophysa robusta-094	Triplophysa robusta	Gansu Fisheries Research Institute	G0293	China	Gansu	Gannan	Diebu	N 34°00.677'	E 103°24.706'	H 2046m	MT271460
Triplophysa robusta-095	Triplophysa robusta	Gansu Fisheries Research Institute	G0294	China	Gansu	Gannan	Diebu	N 34°00.677'	E 103°24.706'	H 2046m	MT271475
Triplophysa robusta-096	Triplophysa robusta	Gansu Fisheries Research Institute	G0295	China	Gansu	Gannan	Diebu	N 34°00.677'	E 103°24.706'	H 2046m	MT271475
Triplophysa robusta-097	Triplophysa robusta	Gansu Fisheries Research Institute	G0296	China	Gansu	Gannan	Diebu	N 34°00.677'	E 103°24.706'	H 2046m	MT271475
Triplophysa robusta-098	Triplophysa robusta	Gansu Fisheries Research Institute	G0297	China	Gansu	Gannan	Diebu	N 34°00.677'	E 103°24.706'	H 2046m	MT271475
Triplophysa robusta-099	Triplophysa robusta	Gansu Fisheries Research Institute	G0298	China	Gansu	Gannan	Diebu	N 34°00.677'	E 103°24.706'	H 2046m	MT271458
Triplophysa robusta-100	Triplophysa robusta	Gansu Fisheries Research Institute	G0299	China	Gansu	Gannan	Diebu	N 34°00.677'	E 103°24.706'	H 2046m	MT271458
Triplophysa robusta-101	Triplophysa robusta	Gansu Fisheries Research Institute	G0300	China	Gansu	Gannan	Diebu	N 34°00.677'	E 103°24.706'	H 2046m	MT271458
Triplophysa robusta-110	Triplophysa robusta	Gansu Fisheries Research Institute	G0309	China	Gansu	Gannan	Diebu	N 34°00.677'	E 103°24.706'	H 2046m	MT271458
Triplophysa robusta-111	Triplophysa robusta	Gansu Fisheries Research Institute	G0310	China	Gansu	Gannan	Diebu	N 34°00.677'	E 103°24.706'	H 2046m	MT271458
Triplophysa robusta-112	Triplophysa robusta	Gansu Fisheries Research Institute	G0311	China	Gansu	Gannan	Diebu	N 34°00.677'	E 103°24.706'	H 2046m	MT271459
Triplophysa robusta-065	Triplophysa robusta	Gansu Fisheries Research Institute	G0264	China	Gansu	Gannan	Diebu	N 34°09.532'	E 103°10.427'	H 2616m	MT271461
Triplophysa robusta-085	Triplophysa robusta	Gansu Fisheries Research Institute	G0284	China	Gansu	Gannan	Diebu	N 34°09.532'	E 103°10.427'	H 2616m	MT271461
Triplophysa robusta-212	Triplophysa robusta	Gansu Fisheries Research Institute	G0411	China	Gansu	Gannan	Diebu	N 34°09.532'	E 103°10.427'	H 2616m	MT271461
Triplophysa robusta-021	Triplophysa robusta	Gansu Fisheries Research Institute	G0220	China	Gansu	Gannan	Diebu	N 34°11.278'	E 103°52.456'	H 2210m	MT271456
Triplophysa robusta-022	Triplophysa robusta	Gansu Fisheries Research Institute	G0221	China	Gansu	Gannan	Diebu	N 34°11.278'	E 103°52.456'	H 2210m	MT271456
Triplophysa robusta-023	Triplophysa robusta	Gansu Fisheries Research Institute	G0222	China	Gansu	Gannan	Diebu	N 34°11.278'	E 103°52.456'	H 2210m	MT271456
Triplophysa robusta-024	Triplophysa robusta	Gansu Fisheries Research Institute	G0223	China	Gansu	Gannan	Diebu	N 34°11.278'	E 103°52.456'	H 2210m	MT271456
Triplophysa robusta-025	Triplophysa robusta	Gansu Fisheries Research Institute	G0224	China	Gansu	Gannan	Diebu	N 34°11.278'	E 103°52.456'	H 2210m	MT271458
Triplophysa robusta-026	Triplophysa robusta	Gansu Fisheries Research Institute	G0225	China	Gansu	Gannan	Diebu	N 34°11.278'	E 103°52.456'	H 2210m	MT271458
Triplophysa robusta-027	Triplophysa robusta	Gansu Fisheries Research Institute	G0226	China	Gansu	Gannan	Diebu	N 34°11.278'	E 103°52.456'	H 2210m	MT271458
Triplophysa robusta-028	Triplophysa robusta	Gansu Fisheries Research Institute	G0227	China	Gansu	Gannan	Diebu	N 34°11.278'	E 103°52.456'	H 2210m	MT271458
Triplophysa robusta-029	Triplophysa robusta	Gansu Fisheries Research Institute	G0228	China	Gansu	Gannan	Diebu	N 34°11.278'	E 103°52.456'	H 2210m	MT271458
Triplophysa robusta-051	Triplophysa robusta	Gansu Fisheries Research Institute	G0250	China	Gansu	Gannan	Diebu	N 34°11.278'	E 103°52.456'	H 2210m	MT271458
Triplophysa robusta-089	Triplophysa robusta	Gansu Fisheries Research Institute	G0288	China	Gansu	Gannan	Diebu	N 34°11.278'	E 103°52.456'	H 2210m	MT271458
Triplophysa robusta-090	Triplophysa robusta	Gansu Fisheries Research Institute	G0289	China	Gansu	Gannan	Diebu	N 34°11.278'	E 103°52.456'	H 2210m	MT271457
Triplophysa robusta-091	Triplophysa robusta	Gansu Fisheries Research Institute	G0290	China	Gansu	Gannan	Diebu	N 34°11.278'	E 103°52.456'	H 2210m	MT271458
Triplophysa robusta-092	Triplophysa robusta	Gansu Fisheries Research Institute	G0291	China	Gansu	Gannan	Diebu	N 34°11.278'	E 103°52.456'	H 2210m	MT271458
Triplophysa robusta-105	Triplophysa robusta	Gansu Fisheries Research Institute	G0304	China	Gansu	Gannan	Diebu	N 34°11.278'	E 103°52.456'	H 2210m	MT271456
Triplophysa robusta-106	Triplophysa robusta	Gansu Fisheries Research Institute	G0305	China	Gansu	Gannan	Diebu	N 34°11.278'	E 103°52.456'	H 2210m	MT271456
Triplophysa robusta-107	Triplophysa robusta	Gansu Fisheries Research Institute	G0306	China	Gansu	Gannan	Diebu	N 34°11.278'	E 103°52.456'	H 2210m	MT271456
Triplophysa robusta-108	Triplophysa robusta	Gansu Fisheries Research Institute	G0307	China	Gansu	Gannan	Diebu	N 34°11.278'	E 103°52.456'	H 2210m	MT271456
Triplophysa robusta-211	Triplophysa robusta	Gansu Fisheries Research Institute	G0410	China	Gansu	Gannan	Diebu	N 34°11.278'	E 103°52.456'	H 2210m	MT271475
Triplophysa robusta-153	Triplophysa robusta	Gansu Fisheries Research Institute	G0352	China	Gansu	Wuwei	Gulang	N 37°22.566'	E 102°55.645'	H 2273m	MT271475
Triplophysa robusta-154	Triplophysa robusta	Gansu Fisheries Research Institute	G0353	China	Gansu	Wuwei	Gulang	N 37°22.566'	E 102°55.645'	H 2273m	MT271475
Triplophysa robusta-155	Triplophysa robusta	Gansu Fisheries Research Institute	G0354	China	Gansu	Wuwei	Gulang	N 37°22.566'	E 102°55.645'	H 2273m	MT271475
Triplophysa robusta-156	Triplophysa robusta	Gansu Fisheries Research Institute	G0355	China	Gansu	Wuwei	Gulang	N 37°22.566'	E 102°55.645'	H 2273m	MT271475
Triplophysa robusta-157	Triplophysa robusta	Gansu Fisheries Research Institute	G0356	China	Gansu	Wuwei	Gulang	N 37°22.566'	E 102°55.645'	H 2273m	MT271514
Triplophysa robusta-208	Triplophysa robusta	Gansu Fisheries Research Institute	G0407	China	Gansu	Wuwei	Gulang	N 37°22.566'	E 102°55.645'	H 2273m	MT271456
Triplophysa robusta-209	Triplophysa robusta	Gansu Fisheries Research Institute	G0408	China	Gansu	Wuwei	Gulang	N 37°22.566'	E 102°55.645'	H 2273m	MT271475
Triplophysa robusta-210	Triplophysa robusta	Gansu Fisheries Research Institute	G0409	China	Gansu	Wuwei	Gulang	N 37°22.566'	E 102°55.645'	H 2273m	MT271475
Triplophysa robusta-158	Triplophysa robusta	Gansu Fisheries Research Institute	G0357	China	Gansu	Wuwei	Gulang	N 37°30.021'	E 102°38.374'	H 2241m	MT271475
Triplophysa robusta-175	Triplophysa robusta	Gansu Fisheries Research Institute	G0374	China	Gansu	Gannan	Hezuo	N 34°40.451'	E 103°00.445'	H 2808m	MT271475
Triplophysa robusta-176	Triplophysa robusta	Gansu Fisheries Research Institute	G0375	China	Gansu	Gannan	Hezuo	N 34°40.451'	E 103°00.445'	H 2808m	MT271475
Triplophysa robusta-177	Triplophysa robusta	Gansu Fisheries Research Institute	G0376	China	Gansu	Gannan	Hezuo	N 34°40.451'	E 103°00.445'	H 2808m	MT271475
Triplophysa robusta-178	Triplophysa robusta	Gansu Fisheries Research Institute	G0377	China	Gansu	Gannan	Hezuo	N 34°40.451'	E 103°00.445'	H 2808m	MT271475
Triplophysa robusta-179	Triplophysa robusta	Gansu Fisheries Research Institute	G0378	China	Gansu	Gannan	Hezuo	N 34°40.451'	E 103°00.445'	H 2808m	MT271456
Triplophysa robusta-180	Triplophysa robusta	Gansu Fisheries Research Institute	G0379	China	Gansu	Gannan	Hezuo	N 34°40.451'	E 103°00.445'	H 2808m	MT271473
Triplophysa robusta-181	Triplophysa robusta	Gansu Fisheries Research Institute	G0380	China	Gansu	Gannan	Hezuo	N 34°40.451'	E 103°00.445'	H 2808m	MT271475
Triplophysa robusta-188	Triplophysa robusta	Gansu Fisheries Research Institute	G0387	China	Gansu	Gannan	Hezuo	N 34°40.451'	E 103°00.445'	H 2808m	MT271474
Triplophysa robusta-189	Triplophysa robusta	Gansu Fisheries Research Institute	G0388	China	Gansu	Gannan	Hezuo	N 34°40.451'	E 103°00.445'	H 2808m	MT271474
Triplophysa robusta-190	Triplophysa robusta	Gansu Fisheries Research Institute	G0389	China	Gansu	Gannan	Hezuo	N 34°40.451'	E 103°00.445'	H 2808m	MT271474
Triplophysa robusta-191	Triplophysa robusta	Gansu Fisheries Research Institute	G0390	China	Gansu	Gannan	Hezuo	N 34°40.451'	E 103°00.445'	H 2808m	MT271474
Triplophysa robusta-192	Triplophysa robusta	Gansu Fisheries Research Institute	G0391	China	Gansu	Gannan	Hezuo	N 34°40.451'	E 103°00.445'	H 2808m	MT271474
Triplophysa robusta-193	Triplophysa robusta	Gansu Fisheries Research Institute	G0392	China	Gansu	Gannan	Hezuo	N 34°40.451'	E 103°00.445'	H 2808m	MT271474
Triplophysa robusta-194	Triplophysa robusta	Gansu Fisheries Research Institute	G0393	China	Gansu	Gannan	Hezuo	N 34°40.451'	E 103°00.445'	H 2808m	MT271474
Triplophysa robusta-195	Triplophysa robusta	Gansu Fisheries Research Institute	G0394	China	Gansu	Gannan	Hezuo	N 34°40.451'	E 103°00.445'	H 2808m	MT271474
Triplophysa robusta-200	Triplophysa robusta	Gansu Fisheries Research Institute	G0399	China	Gansu	Gannan	Hezuo	N 34°40.451'	E 103°00.445'	H 2808m	MT271474
Triplophysa robusta-201	Triplophysa robusta	Gansu Fisheries Research Institute	G0400	China	Gansu	Gannan	Hezuo	N 34°40.451'	E 103°00.445'	H 2808m	MT271474
Triplophysa robusta-202	Triplophysa robusta	Gansu Fisheries Research Institute	G0401	China	Gansu	Gannan	Hezuo	N 34°40.451'	E 103°00.445'	H 2808m	MT271474
Triplophysa robusta-206	Triplophysa robusta	Gansu Fisheries Research Institute	G0405	China	Gansu	Gannan	Hezuo	N 34°40.451'	E 103°00.445'	H 2808m	MT271474
Triplophysa robusta-148	Triplophysa robusta	Gansu Fisheries Research Institute	G0347	China	Gansu	Gannan	Hezuo	N 34°45.381'	E 103°00.675'	H 2928m	MT271474
Triplophysa robusta-149	Triplophysa robusta	Gansu Fisheries Research Institute	G0348	China	Gansu	Gannan	Hezuo	N 34°45.381'	E 103°00.675'	H 2928m	MT271472
Triplophysa robusta-042	Triplophysa robusta	Gansu Fisheries Research Institute	G0241	China	Sichuan	Aba	Jiuzhai	N 33° 9.094'	E 104°17.265'	H 2007m	MT271471
Triplophysa robusta-139	Triplophysa robusta	Gansu Fisheries Research Institute	G0338	China	Gansu	Gannan	Lintan	N 34°57.309'	E 103°36.317'	H 2254m	MT271471
Triplophysa robusta-140	Triplophysa robusta	Gansu Fisheries Research Institute	G0339	China	Gansu	Gannan	Lintan	N 34°57.309'	E 103°36.317'	H 2254m	MT271471
Triplophysa robusta-141	Triplophysa robusta	Gansu Fisheries Research Institute	G0340	China	Gansu	Gannan	Lintan	N 34°57.309'	E 103°36.317'	H 2254m	MT271471
Triplophysa robusta-142	Triplophysa robusta	Gansu Fisheries Research Institute	G0341	China	Gansu	Gannan	Lintan	N 34°57.309'	E 103°36.317'	H 2254m	MT271471
Triplophysa robusta-143	Triplophysa robusta	Gansu Fisheries Research Institute	G0342	China	Gansu	Gannan	Lintan	N 34°57.309'	E 103°36.317'	H 2254m	MT271471
Triplophysa robusta-144	Triplophysa robusta	Gansu Fisheries Research Institute	G0343	China	Gansu	Gannan	Lintan	N 34°57.309'	E 103°36.317'	H 2254m	MT271471
Triplophysa robusta-145	Triplophysa robusta	Gansu Fisheries Research Institute	G0344	China	Gansu	Gannan	Lintan	N 34°57.309'	E 103°36.317'	H 2254m	MT271471
Triplophysa robusta-146	Triplophysa robusta	Gansu Fisheries Research Institute	G0345	China	Gansu	Gannan	Lintan	N 34°57.309'	E 103°36.317'	H 2254m	MT271471
Triplophysa robusta-147	Triplophysa robusta	Gansu Fisheries Research Institute	G0346	China	Gansu	Gannan	Lintan	N 34°57.309'	E 103°36.317'	H 2254m	MT271476
Triplophysa robusta-150	Triplophysa robusta	Gansu Fisheries Research Institute	G0349	China	Gansu	Gannan	Lintan	N 34°57.309'	E 103°36.317'	H 2254m	MT271476
Triplophysa robusta-151	Triplophysa robusta	Gansu Fisheries Research Institute	G0350	China	Gansu	Gannan	Lintan	N 34°57.309'	E 103°36.317'	H 2254m	MT271476
Triplophysa robusta-152	Triplophysa robusta	Gansu Fisheries Research Institute	G0351	China	Gansu	Gannan	Lintan	N 34°57.309'	E 103°36.317'	H 2254m	MT271476
Triplophysa robusta-203	Triplophysa robusta	Gansu Fisheries Research Institute	G0402	China	Gansu	Gannan	Lintan	N 34°57.309'	E 103°36.317'	H 2254m	MT271471
Triplophysa robusta-218	Triplophysa robusta	Gansu Fisheries Research Institute	G0417	China	Gansu	Gannan	Lintan	N 34°57.309'	E 103°36.317'	H 2254m	MT271468
Triplophysa robusta-118	Triplophysa robusta	Gansu Fisheries Research Institute	G0317	China	Gansu	Linxia	Linxia	N 35°28.278'	E 103° 2.238'	H 2076m	MT271468
Triplophysa robusta-119	Triplophysa robusta	Gansu Fisheries Research Institute	G0318	China	Gansu	Linxia	Linxia	N 35°28.278'	E 103° 2.238'	H 2076m	MT271468
Triplophysa robusta-120	Triplophysa robusta	Gansu Fisheries Research Institute	G0319	China	Gansu	Linxia	Linxia	N 35°28.278'	E 103° 2.238'	H 2076m	MT271468
Triplophysa robusta-121	Triplophysa robusta	Gansu Fisheries Research Institute	G0320	China	Gansu	Linxia	Linxia	N 35°28.278'	E 103° 2.238'	H 2076m	MT271455
Triplophysa robusta-122	Triplophysa robusta	Gansu Fisheries Research Institute	G0321	China	Gansu	Linxia	Linxia	N 35°28.278'	E 103° 2.238'	H 2076m	MT271470
Triplophysa robusta-123	Triplophysa robusta	Gansu Fisheries Research Institute	G0322	China	Gansu	Linxia	Linxia	N 35°28.278'	E 103° 2.238'	H 2076m	MT271468
Triplophysa robusta-124	Triplophysa robusta	Gansu Fisheries Research Institute	G0323	China	Gansu	Linxia	Linxia	N 35°28.278'	E 103° 2.238'	H 2076m	MT271468
Triplophysa robusta-125	Triplophysa robusta	Gansu Fisheries Research Institute	G0324	China	Gansu	Linxia	Linxia	N 35°28.278'	E 103° 2.238'	H 2076m	MT271468
Triplophysa robusta-126	Triplophysa robusta	Gansu Fisheries Research Institute	G0325	China	Gansu	Linxia	Linxia	N 35°28.278'	E 103° 2.238'	H 2076m	MT271468
Triplophysa robusta-165	Triplophysa robusta	Gansu Fisheries Research Institute	G0364	China	Gansu	Linxia	Linxia	N 35°28.278'	E 103° 2.238'	H 2076m	MT271468
Triplophysa robusta-166	Triplophysa robusta	Gansu Fisheries Research Institute	G0365	China	Gansu	Linxia	Linxia	N 35°28.278'	E 103° 2.238'	H 2076m	MT271469
Triplophysa robusta-167	Triplophysa robusta	Gansu Fisheries Research Institute	G0366	China	Gansu	Linxia	Linxia	N 35°28.278'	E 103° 2.238'	H 2076m	MT271465
Triplophysa robusta-168	Triplophysa robusta	Gansu Fisheries Research Institute	G0367	China	Gansu	Linxia	Linxia	N 35°28.278'	E 103° 2.238'	H 2076m	MT271465
Triplophysa robusta-169	Triplophysa robusta	Gansu Fisheries Research Institute	G0368	China	Gansu	Linxia	Linxia	N 35°28.278'	E 103° 2.238'	H 2076m	MT271465
Triplophysa robusta-170	Triplophysa robusta	Gansu Fisheries Research Institute	G0369	China	Gansu	Linxia	Linxia	N 35°28.278'	E 103° 2.238'	H 2076m	MT271466
Triplophysa robusta-171	Triplophysa robusta	Gansu Fisheries Research Institute	G0370	China	Gansu	Linxia	Linxia	N 35°28.278'	E 103° 2.238'	H 2076m	MT271467
Triplophysa robusta-172	Triplophysa robusta	Gansu Fisheries Research Institute	G0371	China	Gansu	Linxia	Linxia	N 35°28.278'	E 103° 2.238'	H 2076m	MT271465
Triplophysa robusta-173	Triplophysa robusta	Gansu Fisheries Research Institute	G0372	China	Gansu	Linxia	Linxia	N 35°28.278'	E 103° 2.238'	H 2076m	MT271468
Triplophysa robusta-174	Triplophysa robusta	Gansu Fisheries Research Institute	G0373	China	Gansu	Linxia	Linxia	N 35°28.278'	E 103° 2.238'	H 2076m	MT271468
Triplophysa robusta-068	Triplophysa robusta	Gansu Fisheries Research Institute	G0267	China	Gansu	Longnan	Lixian	N 33°47.308'	E 105°03.073'	H 1938m	MT271468
Triplophysa robusta-069	Triplophysa robusta	Gansu Fisheries Research Institute	G0268	China	Gansu	Longnan	Lixian	N 33°47.308'	E 105°03.073'	H 1938m	MT271468
Triplophysa robusta-070	Triplophysa robusta	Gansu Fisheries Research Institute	G0269	China	Gansu	Longnan	Lixian	N 33°47.308'	E 105°03.073'	H 1938m	MT271468
Triplophysa robusta-071	Triplophysa robusta	Gansu Fisheries Research Institute	G0270	China	Gansu	Longnan	Lixian	N 33°47.308'	E 105°03.073'	H 1938m	MT271468
Triplophysa robusta-072	Triplophysa robusta	Gansu Fisheries Research Institute	G0271	China	Gansu	Longnan	Lixian	N 33°47.308'	E 105°03.073'	H 1938m	MT271455
Triplophysa robusta-066	Triplophysa robusta	Gansu Fisheries Research Institute	G0265	China	Gansu	Longnan	Lixian	N 33°56.006'	E 105°04.772'	H 1297m	MT271465
Triplophysa robusta-067	Triplophysa robusta	Gansu Fisheries Research Institute	G0266	China	Gansu	Longnan	Lixian	N 33°56.006'	E 105°04.772'	H 1297m	MT271465
Triplophysa robusta-217	Triplophysa robusta	Gansu Fisheries Research Institute	G0416	China	Gansu	Longnan	Lixian	N 34°12.715'	E 105°15.943'	H 1434m	MT271465
Triplophysa robusta-161	Triplophysa robusta	Gansu Fisheries Research Institute	G0360	China	Gansu	Dingxi	Minxian	N 34°24.162'	E 104°04.066'	H 2345m	MT271464
Triplophysa robusta-162	Triplophysa robusta	Gansu Fisheries Research Institute	G0361	China	Gansu	Dingxi	Minxian	N 34°24.162'	E 104°04.066'	H 2345m	MT271464
Triplophysa robusta-183	Triplophysa robusta	Gansu Fisheries Research Institute	G0382	China	Gansu	Dingxi	Minxian	N 34°24.162'	E 104°04.066'	H 2345m	MT271464
Triplophysa robusta-184	Triplophysa robusta	Gansu Fisheries Research Institute	G0383	China	Gansu	Dingxi	Minxian	N 34°24.162'	E 104°04.066'	H 2345m	MT271464
Triplophysa robusta-199	Triplophysa robusta	Gansu Fisheries Research Institute	G0398	China	Gansu	Dingxi	Minxian	N 34°24.162'	E 104°04.066'	H 2345m	MT271464
Triplophysa robusta-215	Triplophysa robusta	Gansu Fisheries Research Institute	G0414	China	Gansu	Dingxi	Minxian	N 34°24.162'	E 104°04.066'	H 2345m	MT271464
Triplophysa robusta-216	Triplophysa robusta	Gansu Fisheries Research Institute	G0415	China	Gansu	Dingxi	Minxian	N 34°24.162'	E 104°04.066'	H 2345m	MT271464
Triplophysa robusta-204	Triplophysa robusta	Gansu Fisheries Research Institute	G0403	China	Gansu	Dingxi	Minxian	N 34°29.638'	E 104°04.958'	H 2288m	MT271464
Triplophysa robusta-205	Triplophysa robusta	Gansu Fisheries Research Institute	G0404	China	Gansu	Dingxi	Minxian	N 34°29.638'	E 104°04.958'	H 2288m	MT271464
Triplophysa robusta-015	Triplophysa robusta	Gansu Fisheries Research Institute	G0214	China	Gansu	Longnan	Tanchang	N 33°57.647'	E 104°25.316'	H 2052m	MT271513
Triplophysa robusta-016	Triplophysa robusta	Gansu Fisheries Research Institute	G0215	China	Gansu	Longnan	Tanchang	N 33°57.647'	E 104°25.316'	H 2052m	MT271464
Triplophysa robusta-017	Triplophysa robusta	Gansu Fisheries Research Institute	G0216	China	Gansu	Longnan	Tanchang	N 33°57.647'	E 104°25.316'	H 2052m	MT271464
Triplophysa robusta-018	Triplophysa robusta	Gansu Fisheries Research Institute	G0217	China	Gansu	Longnan	Tanchang	N 33°57.647'	E 104°25.316'	H 2052m	MT271512
Triplophysa robusta-019	Triplophysa robusta	Gansu Fisheries Research Institute	G0218	China	Gansu	Longnan	Tanchang	N 33°57.647'	E 104°25.316'	H 2052m	MT271464
Triplophysa robusta-020	Triplophysa robusta	Gansu Fisheries Research Institute	G0219	China	Gansu	Longnan	Tanchang	N 33°57.647'	E 104°25.316'	H 2052m	MT271462
Triplophysa robusta-035	Triplophysa robusta	Gansu Fisheries Research Institute	G0234	China	Gansu	Longnan	Tanchang	N 33°57.647'	E 104°25.316'	H 2052m	MT271463
Triplophysa robusta-036	Triplophysa robusta	Gansu Fisheries Research Institute	G0235	China	Gansu	Longnan	Tanchang	N 33°57.647'	E 104°25.316'	H 2052m	MT271462
Triplophysa robusta-047	Triplophysa robusta	Gansu Fisheries Research Institute	G0246	China	Gansu	Longnan	Tanchang	N 33°57.647'	E 104°25.316'	H 2052m	MT271462
Triplophysa robusta-048	Triplophysa robusta	Gansu Fisheries Research Institute	G0247	China	Gansu	Longnan	Tanchang	N 33°57.647'	E 104°25.316'	H 2052m	MT271477
Triplophysa robusta-049	Triplophysa robusta	Gansu Fisheries Research Institute	G0248	China	Gansu	Longnan	Tanchang	N 33°57.647'	E 104°25.316'	H 2052m	MT271462
Triplophysa robusta-050	Triplophysa robusta	Gansu Fisheries Research Institute	G0249	China	Gansu	Longnan	Tanchang	N 33°57.647'	E 104°25.316'	H 2052m	MT271481
Triplophysa robusta-052	Triplophysa robusta	Gansu Fisheries Research Institute	G0251	China	Gansu	Longnan	Tanchang	N 33°57.647'	E 104°25.316'	H 2052m	MT271481
Triplophysa robusta-102	Triplophysa robusta	Gansu Fisheries Research Institute	G0301	China	Gansu	Longnan	Tanchang	N 33°57.647'	E 104°25.316'	H 2052m	MT271481
Triplophysa robusta-103	Triplophysa robusta	Gansu Fisheries Research Institute	G0302	China	Gansu	Longnan	Tanchang	N 33°57.647'	E 104°25.316'	H 2052m	MT271479
Triplophysa robusta-104	Triplophysa robusta	Gansu Fisheries Research Institute	G0303	China	Gansu	Longnan	Tanchang	N 33°57.647'	E 104°25.316'	H 2052m	MT271481
Triplophysa robusta-001	Triplophysa robusta	Gansu Fisheries Research Institute	G0200	China	Gansu	Longnan	Tanchang	N 33°59.306'	E 104°22.885'	H 1894m	MT271511
Triplophysa robusta-014	Triplophysa robusta	Gansu Fisheries Research Institute	G0213	China	Gansu	Longnan	Tanchang	N 33°59.306'	E 104°22.885'	H 1894m	MT271462
Triplophysa robusta-219	Triplophysa robusta	Gansu Fisheries Research Institute	G0418	China	Gansu	Longnan	Tanchang	N 33°59.306'	E 104°22.885'	H 1894m	MT271510
Triplophysa robusta-182	Triplophysa robusta	Gansu Fisheries Research Institute	G0381	China	Gansu	Dingxi	Weiyuan	N 35°00.890'	E 104°12.790'	H 2231m	MT271478
Triplophysa robusta-186	Triplophysa robusta	Gansu Fisheries Research Institute	G0385	China	Gansu	Dingxi	Weiyuan	N 35°00.890'	E 104°12.790'	H 2231m	MT271478
Triplophysa robusta-003	Triplophysa robusta	Gansu Fisheries Research Institute	G0202	China	Gansu	Longnan	Wenxian	N 33°02.431'	E 104°51.272'	H 1983m	MT271478
Triplophysa robusta-004	Triplophysa robusta	Gansu Fisheries Research Institute	G0203	China	Gansu	Longnan	Wenxian	N 33°02.431'	E 104°51.272'	H 1983m	MT271478
Triplophysa robusta-005	Triplophysa robusta	Gansu Fisheries Research Institute	G0204	China	Gansu	Longnan	Wenxian	N 33°02.431'	E 104°51.272'	H 1983m	MT271478
Triplophysa robusta-006	Triplophysa robusta	Gansu Fisheries Research Institute	G0205	China	Gansu	Longnan	Wenxian	N 33°02.431'	E 104°51.272'	H 1983m	MT271478
Triplophysa robusta-007	Triplophysa robusta	Gansu Fisheries Research Institute	G0206	China	Gansu	Longnan	Wenxian	N 33°02.431'	E 104°51.272'	H 1983m	MT271456
Triplophysa robusta-008	Triplophysa robusta	Gansu Fisheries Research Institute	G0207	China	Gansu	Longnan	Wenxian	N 33°02.431'	E 104°51.272'	H 1983m	MT271456
Triplophysa robusta-009	Triplophysa robusta	Gansu Fisheries Research Institute	G0208	China	Gansu	Longnan	Wenxian	N 33°02.431'	E 104°51.272'	H 1983m	MT271509
Triplophysa robusta-010	Triplophysa robusta	Gansu Fisheries Research Institute	G0209	China	Gansu	Longnan	Wenxian	N 33°02.431'	E 104°51.272'	H 1983m	MT271456
Triplophysa robusta-011	Triplophysa robusta	Gansu Fisheries Research Institute	G0210	China	Gansu	Longnan	Wenxian	N 33°02.431'	E 104°51.272'	H 1983m	MT271456
Triplophysa robusta-012	Triplophysa robusta	Gansu Fisheries Research Institute	G0211	China	Gansu	Longnan	Wenxian	N 33°02.431'	E 104°51.272'	H 1983m	MT271456
Triplophysa robusta-037	Triplophysa robusta	Gansu Fisheries Research Institute	G0236	China	Gansu	Longnan	Wenxian	N 33°02.431'	E 104°51.272'	H 1983m	MT271456
Triplophysa robusta-038	Triplophysa robusta	Gansu Fisheries Research Institute	G0237	China	Gansu	Longnan	Wenxian	N 33°02.431'	E 104°51.272'	H 1983m	MT271456
Triplophysa robusta-039	Triplophysa robusta	Gansu Fisheries Research Institute	G0238	China	Gansu	Longnan	Wenxian	N 33°02.431'	E 104°51.272'	H 1983m	MT271484
Triplophysa robusta-041	Triplophysa robusta	Gansu Fisheries Research Institute	G0240	China	Gansu	Longnan	Wenxian	N 33°02.431'	E 104°51.272'	H 1983m	MT271484
Triplophysa robusta-053	Triplophysa robusta	Gansu Fisheries Research Institute	G0252	China	Gansu	Longnan	Wenxian	N 33°02.431'	E 104°51.272'	H 1983m	MT271484
Triplophysa robusta-054	Triplophysa robusta	Gansu Fisheries Research Institute	G0253	China	Gansu	Longnan	Wenxian	N 33°02.431'	E 104°51.272'	H 1983m	MT271484
Triplophysa robusta-055	Triplophysa robusta	Gansu Fisheries Research Institute	G0254	China	Gansu	Longnan	Wenxian	N 33°02.431'	E 104°51.272'	H 1983m	MT271484
Triplophysa robusta-056	Triplophysa robusta	Gansu Fisheries Research Institute	G0255	China	Gansu	Longnan	Wenxian	N 33°02.431'	E 104°51.272'	H 1983m	MT271484
Triplophysa robusta-057	Triplophysa robusta	Gansu Fisheries Research Institute	G0256	China	Gansu	Longnan	Wenxian	N 33°02.431'	E 104°51.272'	H 1983m	MT271484
Triplophysa robusta-058	Triplophysa robusta	Gansu Fisheries Research Institute	G0257	China	Gansu	Longnan	Wenxian	N 33°02.431'	E 104°51.272'	H 1983m	MT271484
Triplophysa robusta-059	Triplophysa robusta	Gansu Fisheries Research Institute	G0258	China	Gansu	Longnan	Wenxian	N 33°02.431'	E 104°51.272'	H 1983m	MT271484
Triplophysa robusta-060	Triplophysa robusta	Gansu Fisheries Research Institute	G0259	China	Gansu	Longnan	Wenxian	N 33°02.431'	E 104°51.272'	H 1983m	MT271484
Triplophysa robusta-061	Triplophysa robusta	Gansu Fisheries Research Institute	G0260	China	Gansu	Longnan	Wenxian	N 33°02.431'	E 104°51.272'	H 1983m	MT271484
Triplophysa robusta-064	Triplophysa robusta	Gansu Fisheries Research Institute	G0263	China	Gansu	Longnan	Wenxian	N 33°02.431'	E 104°51.272'	H 1983m	MT271484
Triplophysa robusta-073	Triplophysa robusta	Gansu Fisheries Research Institute	G0272	China	Gansu	Longnan	Wenxian	N 33°02.431'	E 104°51.272'	H 1983m	MT271456
Triplophysa robusta-213	Triplophysa robusta	Gansu Fisheries Research Institute	G0412	China	Gansu	Longnan	Wenxian	N 33°02.431'	E 104°51.272'	H 1983m	MT271483
Triplophysa robusta-214	Triplophysa robusta	Gansu Fisheries Research Institute	G0413	China	Gansu	Longnan	Wenxian	N 33°02.431'	E 104°51.272'	H 1983m	MT271482
Triplophysa robusta-002	Triplophysa robusta	Gansu Fisheries Research Institute	G0201	China	Gansu	Longnan	Wudu	N 33°16.390'	E 105°11.378'	H 1949m	MT271508
Triplophysa robusta-040	Triplophysa robusta	Gansu Fisheries Research Institute	G0239	China	Gansu	Longnan	Wudu	N 33°16.390'	E 105°11.378'	H 1949m	MT271481
Triplophysa robusta-062	Triplophysa robusta	Gansu Fisheries Research Institute	G0261	China	Gansu	Longnan	Wudu	N 33°16.390'	E 105°11.378'	H 1949m	MT271481
Triplophysa robusta-063	Triplophysa robusta	Gansu Fisheries Research Institute	G0262	China	Gansu	Longnan	Wudu	N 33°16.390'	E 105°11.378'	H 1949m	MT271481
Triplophysa robusta-160	Triplophysa robusta	Gansu Fisheries Research Institute	G0359	China	Gansu	Gannan	Xiahe	N 34°51.126'	E 102° 7.922'	H 3490m	MT271481
Triplophysa robusta-196	Triplophysa robusta	Gansu Fisheries Research Institute	G0395	China	Gansu	Gannan	Xiahe	N 34°51.126'	E 102° 7.922'	H 3490m	MT271507
Triplophysa robusta-197	Triplophysa robusta	Gansu Fisheries Research Institute	G0396	China	Gansu	Gannan	Xiahe	N 34°51.126'	E 102° 7.922'	H 3490m	MT271481
Triplophysa robusta-198	Triplophysa robusta	Gansu Fisheries Research Institute	G0397	China	Gansu	Gannan	Xiahe	N 34°51.126'	E 102° 7.922'	H 3490m	MT271481
Triplophysa robusta-115	Triplophysa robusta	Gansu Fisheries Research Institute	G0314	China	Gansu	Lanzhou	Yongchang	N 36°18.697'	E 103°25.040'	H 2066m	MT271481
Triplophysa robusta-116	Triplophysa robusta	Gansu Fisheries Research Institute	G0315	China	Gansu	Lanzhou	Yongchang	N 36°18.697'	E 103°25.040'	H 2066m	MT271455
Triplophysa robusta-117	Triplophysa robusta	Gansu Fisheries Research Institute	G0316	China	Gansu	Lanzhou	Yongchang	N 36°18.697'	E 103°25.040'	H 2066m	MT271455
Triplophysa robusta-128	Triplophysa robusta	Gansu Fisheries Research Institute	G0327	China	Gansu	Lanzhou	Yongchang	N 36°18.697'	E 103°25.040'	H 2066m	MT271455
Triplophysa robusta-129	Triplophysa robusta	Gansu Fisheries Research Institute	G0328	China	Gansu	Lanzhou	Yongchang	N 36°18.697'	E 103°25.040'	H 2066m	MT271456
Triplophysa robusta-130	Triplophysa robusta	Gansu Fisheries Research Institute	G0329	China	Gansu	Lanzhou	Yongchang	N 36°18.697'	E 103°25.040'	H 2066m	MT271456
Triplophysa robusta-131	Triplophysa robusta	Gansu Fisheries Research Institute	G0330	China	Gansu	Lanzhou	Yongchang	N 36°18.697'	E 103°25.040'	H 2066m	MT271489
Triplophysa robusta-127	Triplophysa robusta	Gansu Fisheries Research Institute	G0326	China	Gansu	Jinchang	Yongchang	N 38°19.887'	E 102° 1.632'	H 1827m	MT271456
Triplophysa robusta-132	Triplophysa robusta	Gansu Fisheries Research Institute	G0331	China	Gansu	Lanzhou	Yuzhong	N 35°51.857'	E 104°00.827'	H 2094m	MT271488
Triplophysa robusta-133	Triplophysa robusta	Gansu Fisheries Research Institute	G0332	China	Gansu	Lanzhou	Yuzhong	N 35°51.857'	E 104°00.827'	H 2094m	MT271488
Triplophysa robusta-134	Triplophysa robusta	Gansu Fisheries Research Institute	G0333	China	Gansu	Lanzhou	Yuzhong	N 35°51.857'	E 104°00.827'	H 2094m	MT271488
Triplophysa robusta-135	Triplophysa robusta	Gansu Fisheries Research Institute	G0334	China	Gansu	Lanzhou	Yuzhong	N 35°51.857'	E 104°00.827'	H 2094m	MT271486
Triplophysa robusta-136	Triplophysa robusta	Gansu Fisheries Research Institute	G0335	China	Gansu	Lanzhou	Yuzhong	N 35°51.857'	E 104°00.827'	H 2094m	MT271506
Triplophysa robusta-137	Triplophysa robusta	Gansu Fisheries Research Institute	G0336	China	Gansu	Lanzhou	Yuzhong	N 35°51.857'	E 104°00.827'	H 2094m	MT271487
Triplophysa robusta-138	Triplophysa robusta	Gansu Fisheries Research Institute	G0337	China	Gansu	Lanzhou	Yuzhong	N 35°51.857'	E 104°00.827'	H 2094m	MT271485
Triplophysa robusta-163	Triplophysa robusta	Gansu Fisheries Research Institute	G0362	China	Gansu	Lanzhou	Yuzhong	N 35°51.857'	E 104°00.827'	H 2094m	MT271485
Triplophysa robusta-164	Triplophysa robusta	Gansu Fisheries Research Institute	G0363	China	Gansu	Lanzhou	Yuzhong	N 35°51.857'	E 104°00.827'	H 2094m	MT271485
Triplophysa robusta-030	Triplophysa robusta	Gansu Fisheries Research Institute	G0229	China	Gansu	Gannan	Zhouqu	N 33°55.107'	E 103°57.393'	H 1805m	MT271455
Triplophysa robusta-031	Triplophysa robusta	Gansu Fisheries Research Institute	G0230	China	Gansu	Gannan	Zhouqu	N 33°55.107'	E 103°57.393'	H 1805m	MT271490
Triplophysa robusta-032	Triplophysa robusta	Gansu Fisheries Research Institute	G0231	China	Gansu	Gannan	Zhouqu	N 33°55.107'	E 103°57.393'	H 1805m	MT271455
Triplophysa robusta-033	Triplophysa robusta	Gansu Fisheries Research Institute	G0232	China	Gansu	Gannan	Zhouqu	N 33°55.107'	E 103°57.393'	H 1805m	MT271455
Triplophysa robusta-034	Triplophysa robusta	Gansu Fisheries Research Institute	G0233	China	Gansu	Gannan	Zhouqu	N 33°55.107'	E 103°57.393'	H 1805m	MT271455
Triplophysa robusta-084	Triplophysa robusta	Gansu Fisheries Research Institute	G0283	China	Gansu	Gannan	Zhouqu	N 33°55.107'	E 103°57.393'	H 1805m	MT271455
Triplophysa robusta-109	Triplophysa robusta	Gansu Fisheries Research Institute	G0308	China	Gansu	Gannan	Zhouqu	N 33°55.107'	E 103°57.393'	H 1805m	MT271455
Triplophysa robusta-113	Triplophysa robusta	Gansu Fisheries Research Institute	G0312	China	Gansu	Gannan	Zhouqu	N 33°55.107'	E 103°57.393'	H 1805m	MT271455
Triplophysa robusta-114	Triplophysa robusta	Gansu Fisheries Research Institute	G0313	China	Gansu	Gannan	Zhouqu	N 33°55.107'	E 103°57.393'	H 1805m	MT271455
Triplophysa robusta-207	Triplophysa robusta	Gansu Fisheries Research Institute	G0406	China	Gansu	Gannan	Zhuoni	N 34°32.387'	E 103°35.107'	H 2526m	MT271455
Triplophysa robusta-159	Triplophysa robusta	Gansu Fisheries Research Institute	G0358	China	Gansu	Gannan	Zhuoni	N 34°37.107'	E 103°11.066'	H 2718m	MT271455
Triplophysa robusta-185	Triplophysa robusta	Gansu Fisheries Research Institute	G0384	China	Gansu	Gannan	Zhuoni	N 34°59.590'	E 103°48.918'	H 2085m	MT271455
Triplophysa robusta-220	Triplophysa robusta sp1	Gansu Fisheries Research Institute	G0419	China	Gansu	Pingliang	Chongxin	N 35°10.769'	E 107°02.760'	H 1181m	MT271504
Triplophysa robusta-221	Triplophysa robusta sp1	Gansu Fisheries Research Institute	G0420	China	Gansu	Pingliang	Chongxin	N 35°10.769'	E 107°02.760'	H 1181m	MT271492
Triplophysa robusta-222	Triplophysa robusta sp1	Gansu Fisheries Research Institute	G0421	China	Gansu	Pingliang	Chongxin	N 35°10.769'	E 107°02.760'	H 1181m	MT271492
Triplophysa robusta-223	Triplophysa robusta sp1	Gansu Fisheries Research Institute	G0422	China	Gansu	Pingliang	Chongxin	N 35°10.769'	E 107°02.760'	H 1181m	MT271492
Triplophysa robusta-224	Triplophysa robusta sp1	Gansu Fisheries Research Institute	G0423	China	Gansu	Pingliang	Chongxin	N 35°10.769'	E 107°02.760'	H 1181m	MT271492
Triplophysa robusta-225	Triplophysa robusta sp1	Gansu Fisheries Research Institute	G0424	China	Gansu	Pingliang	Chongxin	N 35°10.769'	E 107°02.760'	H 1181m	MT271502
Triplophysa robusta-226	Triplophysa robusta sp1	Gansu Fisheries Research Institute	G0425	China	Gansu	Pingliang	Chongxin	N 35°10.769'	E 107°02.760'	H 1181m	MT271492
Triplophysa robusta-227	Triplophysa robusta sp1	Gansu Fisheries Research Institute	G0426	China	Gansu	Pingliang	Chongxin	N 35°10.769'	E 107°02.760'	H 1181m	MT271492
Triplophysa robusta-228	Triplophysa robusta sp1	Gansu Fisheries Research Institute	G0427	China	Gansu	Pingliang	Chongxin	N 35°10.769'	E 107°02.760'	H 1181m	MT271501
Triplophysa robusta-229	Triplophysa robusta sp1	Gansu Fisheries Research Institute	G0428	China	Gansu	Pingliang	Chongxin	N 35°10.769'	E 107°02.760'	H 1181m	MT271492
Triplophysa robusta-230	Triplophysa robusta sp1	Gansu Fisheries Research Institute	G0429	China	Gansu	Pingliang	Chongxin	N 35°10.769'	E 107°02.760'	H 1181m	MT271492
Triplophysa robusta-231	Triplophysa robusta sp1	Gansu Fisheries Research Institute	G0430	China	Gansu	Pingliang	Chongxin	N 35°10.769'	E 107°02.760'	H 1181m	MT271492
Triplophysa robusta-232	Triplophysa robusta sp1	Gansu Fisheries Research Institute	G0431	China	Gansu	Pingliang	Chongxin	N 35°10.769'	E 107°02.760'	H 1181m	MT271492
Triplophysa robusta-233	Triplophysa robusta sp1	Gansu Fisheries Research Institute	G0432	China	Gansu	Pingliang	Chongxin	N 35°10.769'	E 107°02.760'	H 1181m	MT271492
Triplophysa robusta-234	Triplophysa robusta sp1	Gansu Fisheries Research Institute	G0433	China	Gansu	Pingliang	Chongxin	N 35°10.769'	E 107°02.760'	H 1181m	MT271503
Triplophysa robusta-235	Triplophysa robusta sp1	Gansu Fisheries Research Institute	G0434	China	Gansu	Pingliang	Chongxin	N 35°10.769'	E 107°02.760'	H 1181m	MT271492
Triplophysa robusta-236	Triplophysa robusta sp1	Gansu Fisheries Research Institute	G0435	China	Gansu	Pingliang	Chongxin	N 35°10.769'	E 107°02.760'	H 1181m	MT271492
Triplophysa robusta-237	Triplophysa robusta sp1	Gansu Fisheries Research Institute	G0436	China	Gansu	Pingliang	Chongxin	N 35°10.769'	E 107°02.760'	H 1181m	MT271492
Triplophysa robusta-238	Triplophysa robusta sp1	Gansu Fisheries Research Institute	G0437	China	Gansu	Pingliang	Chongxin	N 35°10.769'	E 107°02.760'	H 1181m	MT271492
Triplophysa robusta-239	Triplophysa robusta sp1	Gansu Fisheries Research Institute	G0438	China	Gansu	Pingliang	Chongxin	N 35°10.769'	E 107°02.760'	H 1181m	MT271500
Triplophysa robusta-240	Triplophysa robusta sp1	Gansu Fisheries Research Institute	G0439	China	Gansu	Pingliang	Chongxin	N 35°10.769'	E 107°02.760'	H 1181m	MT271492
Triplophysa robusta-241	Triplophysa robusta sp1	Gansu Fisheries Research Institute	G0440	China	Gansu	Pingliang	Chongxin	N 35°10.769'	E 107°02.760'	H 1181m	MT271492
Triplophysa robusta-242	Triplophysa robusta sp1	Gansu Fisheries Research Institute	G0441	China	Gansu	Pingliang	Chongxin	N 35°10.769'	E 107°02.760'	H 1181m	MT271492
Triplophysa robusta-243	Triplophysa robusta sp1	Gansu Fisheries Research Institute	G0442	China	Gansu	Pingliang	Chongxin	N 35°10.769'	E 107°02.760'	H 1181m	MT271492
Triplophysa robusta-244	Triplophysa robusta sp1	Gansu Fisheries Research Institute	G0443	China	Gansu	Pingliang	Chongxin	N 35°10.769'	E 107°02.760'	H 1181m	MT271492
Triplophysa robusta-245	Triplophysa robusta sp1	Gansu Fisheries Research Institute	G0444	China	Gansu	Pingliang	Chongxin	N 35°10.769'	E 107°02.760'	H 1181m	MT271500
Triplophysa robusta-246	Triplophysa robusta sp1	Gansu Fisheries Research Institute	G0445	China	Gansu	Pingliang	Chongxin	N 35°10.769'	E 107°02.760'	H 1181m	MT271500
Triplophysa robusta-247	Triplophysa robusta sp1	Gansu Fisheries Research Institute	G0446	China	Gansu	Pingliang	Chongxin	N 35°10.769'	E 107°02.760'	H 1181m	MT271492
Triplophysa robusta-248	Triplophysa robusta sp1	Gansu Fisheries Research Institute	G0447	China	Gansu	Pingliang	Chongxin	N 35°10.769'	E 107°02.760'	H 1181m	MT271492
Triplophysa robusta-249	Triplophysa robusta sp1	Gansu Fisheries Research Institute	G0448	China	Gansu	Pingliang	Chongxin	N 35°10.769'	E 107°02.760'	H 1181m	MT271492
Triplophysa robusta-250	Triplophysa robusta sp1	Gansu Fisheries Research Institute	G0449	China	Gansu	Pingliang	Chongxin	N 35°10.769'	E 107°02.760'	H 1181m	MT271499
Triplophysa robusta-251	Triplophysa robusta sp1	Gansu Fisheries Research Institute	G0450	China	Gansu	Pingliang	Chongxin	N 35°10.769'	E 107°02.760'	H 1181m	MT271492
Triplophysa robusta-252	Triplophysa robusta sp1	Gansu Fisheries Research Institute	G0451	China	Gansu	Pingliang	Chongxin	N 35°10.769'	E 107°02.760'	H 1181m	MT271492
Triplophysa robusta-253	Triplophysa robusta sp1	Gansu Fisheries Research Institute	G0452	China	Gansu	Pingliang	Chongxin	N 35°10.769'	E 107°02.760'	H 1181m	MT271498
Triplophysa robusta-254	Triplophysa robusta sp1	Gansu Fisheries Research Institute	G0453	China	Gansu	Pingliang	Chongxin	N 35°10.769'	E 107°02.760'	H 1181m	MT271492
Triplophysa robusta-255	Triplophysa robusta sp1	Gansu Fisheries Research Institute	G0454	China	Gansu	Pingliang	Chongxin	N 35°10.769'	E 107°02.760'	H 1181m	MT271492
Triplophysa robusta-256	Triplophysa robusta sp1	Gansu Fisheries Research Institute	G0455	China	Gansu	Pingliang	Chongxin	N 35°10.769'	E 107°02.760'	H 1181m	MT271492
Triplophysa robusta-353	Triplophysa robusta sp1	Gansu Fisheries Research Institute	G0552	China	Gansu	Pingliang	Chongxin	N 35°10.769'	E 107°02.760'	H 1181m	MT271492
Triplophysa robusta-354	Triplophysa robusta sp1	Gansu Fisheries Research Institute	G0553	China	Gansu	Pingliang	Chongxin	N 35°10.769'	E 107°02.760'	H 1181m	MT271497
Triplophysa robusta-355	Triplophysa robusta sp1	Gansu Fisheries Research Institute	G0554	China	Gansu	Pingliang	Chongxin	N 35°10.769'	E 107°02.760'	H 1181m	MT271492
Triplophysa robusta-356	Triplophysa robusta sp1	Gansu Fisheries Research Institute	G0555	China	Gansu	Pingliang	Chongxin	N 35°10.769'	E 107°02.760'	H 1181m	MT271492
Triplophysa robusta-395	Triplophysa robusta sp1	Gansu Fisheries Research Institute	G0594	China	Gansu	Pingliang	Chongxin	N 35°10.769'	E 107°02.760'	H 1181m	MT271492
Triplophysa robusta-403	Triplophysa robusta sp1	Gansu Fisheries Research Institute	G0602	China	Gansu	Pingliang	Chongxin	N 35°10.769'	E 107°02.760'	H 1181m	MT271492
Triplophysa robusta-286	Triplophysa robusta sp1	Gansu Fisheries Research Institute	G0485	China	Gansu	Qingyang	Heshui	N 35°51.116'	E 108°15.081'	H 1140m	MT271492
Triplophysa robusta-287	Triplophysa robusta sp1	Gansu Fisheries Research Institute	G0486	China	Gansu	Qingyang	Heshui	N 35°51.116'	E 108°15.081'	H 1140m	MT271492
Triplophysa robusta-288	Triplophysa robusta sp1	Gansu Fisheries Research Institute	G0487	China	Gansu	Qingyang	Heshui	N 35°51.116'	E 108°15.081'	H 1140m	MT271492
Triplophysa robusta-289	Triplophysa robusta sp1	Gansu Fisheries Research Institute	G0488	China	Gansu	Qingyang	Heshui	N 35°51.116'	E 108°15.081'	H 1140m	MT271492
Triplophysa robusta-295	Triplophysa robusta sp1	Gansu Fisheries Research Institute	G0494	China	Gansu	Qingyang	Heshui	N 35°51.116'	E 108°15.081'	H 1140m	MT271492
Triplophysa robusta-378	Triplophysa robusta sp1	Gansu Fisheries Research Institute	G0577	China	Gansu	Qingyang	Heshui	N 35°51.116'	E 108°15.081'	H 1140m	MT271493
Triplophysa robusta-389	Triplophysa robusta sp1	Gansu Fisheries Research Institute	G0588	China	Gansu	Qingyang	Heshui	N 35°51.116'	E 108°15.081'	H 1140m	MT271494
Triplophysa robusta-390	Triplophysa robusta sp1	Gansu Fisheries Research Institute	G0589	China	Gansu	Qingyang	Heshui	N 35°51.116'	E 108°15.081'	H 1140m	MT271492
Triplophysa robusta-391	Triplophysa robusta sp1	Gansu Fisheries Research Institute	G0590	China	Gansu	Qingyang	Heshui	N 35°51.116'	E 108°15.081'	H 1140m	MT271492
Triplophysa robusta-411	Triplophysa robusta sp1	Gansu Fisheries Research Institute	G0610	China	Gansu	Qingyang	Huachi	N 36°14.727'	E 108°27.542'	H 1198m	MT271492
Triplophysa robusta-268	Triplophysa robusta sp1	Gansu Fisheries Research Institute	G0467	China	Gansu	Qingyang	Huachi	N 36°23.554'	E 108°10.182'	H 1405m	MT271492
Triplophysa robusta-269	Triplophysa robusta sp1	Gansu Fisheries Research Institute	G0468	China	Gansu	Qingyang	Huachi	N 36°23.554'	E 108°10.182'	H 1405m	MT271492
Triplophysa robusta-270	Triplophysa robusta sp1	Gansu Fisheries Research Institute	G0469	China	Gansu	Qingyang	Huachi	N 36°23.554'	E 108°10.182'	H 1405m	MT271492
Triplophysa robusta-362	Triplophysa robusta sp1	Gansu Fisheries Research Institute	G0561	China	Gansu	Qingyang	Huachi	N 36°23.554'	E 108°10.182'	H 1405m	MT271492
Triplophysa robusta-363	Triplophysa robusta sp1	Gansu Fisheries Research Institute	G0562	China	Gansu	Qingyang	Huachi	N 36°23.554'	E 108°10.182'	H 1405m	MT271492
Triplophysa robusta-364	Triplophysa robusta sp1	Gansu Fisheries Research Institute	G0563	China	Gansu	Qingyang	Huachi	N 36°23.554'	E 108°10.182'	H 1405m	MT271492
Triplophysa robusta-405	Triplophysa robusta sp1	Gansu Fisheries Research Institute	G0604	China	Gansu	Qingyang	Huachi	N 36°23.554'	E 108°10.182'	H 1405m	MT271492
Triplophysa robusta-406	Triplophysa robusta sp1	Gansu Fisheries Research Institute	G0605	China	Gansu	Qingyang	Huachi	N 36°23.554'	E 108°10.182'	H 1405m	MT271492
Triplophysa robusta-263	Triplophysa robusta sp1	Gansu Fisheries Research Institute	G0462	China	Gansu	Pingliang	Huating	N 35°18.599'	E 106°36.832'	H 1535m	MT271492
Triplophysa robusta-264	Triplophysa robusta sp1	Gansu Fisheries Research Institute	G0463	China	Gansu	Pingliang	Huating	N 35°18.599'	E 106°36.832'	H 1535m	MT271494
Triplophysa robusta-265	Triplophysa robusta sp1	Gansu Fisheries Research Institute	G0464	China	Gansu	Pingliang	Huating	N 35°18.599'	E 106°36.832'	H 1535m	MT271492
Triplophysa robusta-266	Triplophysa robusta sp1	Gansu Fisheries Research Institute	G0465	China	Gansu	Pingliang	Huating	N 35°18.599'	E 106°36.832'	H 1535m	MT271492
Triplophysa robusta-267	Triplophysa robusta sp1	Gansu Fisheries Research Institute	G0466	China	Gansu	Pingliang	Huating	N 35°18.599'	E 106°36.832'	H 1535m	MT271494
Triplophysa robusta-357	Triplophysa robusta sp1	Gansu Fisheries Research Institute	G0556	China	Gansu	Pingliang	Huating	N 35°18.599'	E 106°36.832'	H 1535m	MT271492
Triplophysa robusta-358	Triplophysa robusta sp1	Gansu Fisheries Research Institute	G0557	China	Gansu	Pingliang	Huating	N 35°18.599'	E 106°36.832'	H 1535m	MT271492
Triplophysa robusta-360	Triplophysa robusta sp1	Gansu Fisheries Research Institute	G0559	China	Gansu	Pingliang	Huating	N 35°18.599'	E 106°36.832'	H 1535m	MT271492
Triplophysa robusta-396	Triplophysa robusta sp1	Gansu Fisheries Research Institute	G0595	China	Gansu	Pingliang	Huating	N 35°18.599'	E 106°36.832'	H 1535m	MT271492
Triplophysa robusta-400	Triplophysa robusta sp1	Gansu Fisheries Research Institute	G0599	China	Gansu	Pingliang	Huating	N 35°18.599'	E 106°36.832'	H 1535m	MT271492
Triplophysa robusta-299	Triplophysa robusta sp1	Gansu Fisheries Research Institute	G0498	China	Gansu	Pingliang	Jingchuan	N 35°13.610'	E 107°24.907'	H 1036m	MT271492
Triplophysa robusta-300	Triplophysa robusta sp1	Gansu Fisheries Research Institute	G0499	China	Gansu	Pingliang	Jingchuan	N 35°13.610'	E 107°24.907'	H 1036m	MT271492
Triplophysa robusta-301	Triplophysa robusta sp1	Gansu Fisheries Research Institute	G0500	China	Gansu	Pingliang	Jingchuan	N 35°13.610'	E 107°24.907'	H 1036m	MT271492
Triplophysa robusta-302	Triplophysa robusta sp1	Gansu Fisheries Research Institute	G0501	China	Gansu	Pingliang	Jingchuan	N 35°13.610'	E 107°24.907'	H 1036m	MT271494
Triplophysa robusta-303	Triplophysa robusta sp1	Gansu Fisheries Research Institute	G0502	China	Gansu	Pingliang	Jingchuan	N 35°13.610'	E 107°24.907'	H 1036m	MT271491
Triplophysa robusta-304	Triplophysa robusta sp1	Gansu Fisheries Research Institute	G0503	China	Gansu	Pingliang	Jingchuan	N 35°13.610'	E 107°24.907'	H 1036m	MT271491
Triplophysa robusta-305	Triplophysa robusta sp1	Gansu Fisheries Research Institute	G0504	China	Gansu	Pingliang	Jingchuan	N 35°13.610'	E 107°24.907'	H 1036m	MT271491
Triplophysa robusta-306	Triplophysa robusta sp1	Gansu Fisheries Research Institute	G0505	China	Gansu	Pingliang	Jingchuan	N 35°13.610'	E 107°24.907'	H 1036m	MT271491
Triplophysa robusta-307	Triplophysa robusta sp1	Gansu Fisheries Research Institute	G0506	China	Gansu	Pingliang	Jingchuan	N 35°13.610'	E 107°24.907'	H 1036m	MT271491
Triplophysa robusta-308	Triplophysa robusta sp1	Gansu Fisheries Research Institute	G0507	China	Gansu	Pingliang	Jingchuan	N 35°13.610'	E 107°24.907'	H 1036m	MT271491
Triplophysa robusta-309	Triplophysa robusta sp1	Gansu Fisheries Research Institute	G0508	China	Gansu	Pingliang	Jingchuan	N 35°13.610'	E 107°24.907'	H 1036m	MT271491
Triplophysa robusta-310	Triplophysa robusta sp1	Gansu Fisheries Research Institute	G0509	China	Gansu	Pingliang	Jingchuan	N 35°13.610'	E 107°24.907'	H 1036m	MT271492
Triplophysa robusta-311	Triplophysa robusta sp1	Gansu Fisheries Research Institute	G0510	China	Gansu	Pingliang	Jingchuan	N 35°13.610'	E 107°24.907'	H 1036m	MT271492
Triplophysa robusta-312	Triplophysa robusta sp1	Gansu Fisheries Research Institute	G0511	China	Gansu	Pingliang	Jingchuan	N 35°13.610'	E 107°24.907'	H 1036m	MT271492
Triplophysa robusta-313	Triplophysa robusta sp1	Gansu Fisheries Research Institute	G0512	China	Gansu	Pingliang	Jingchuan	N 35°13.610'	E 107°24.907'	H 1036m	MT271492
Triplophysa robusta-314	Triplophysa robusta sp1	Gansu Fisheries Research Institute	G0513	China	Gansu	Pingliang	Jingchuan	N 35°13.610'	E 107°24.907'	H 1036m	MT271492
Triplophysa robusta-315	Triplophysa robusta sp1	Gansu Fisheries Research Institute	G0514	China	Gansu	Pingliang	Jingchuan	N 35°13.610'	E 107°24.907'	H 1036m	MT271491
Triplophysa robusta-316	Triplophysa robusta sp1	Gansu Fisheries Research Institute	G0515	China	Gansu	Pingliang	Jingchuan	N 35°13.610'	E 107°24.907'	H 1036m	MT271492
Triplophysa robusta-317	Triplophysa robusta sp1	Gansu Fisheries Research Institute	G0516	China	Gansu	Pingliang	Jingchuan	N 35°13.610'	E 107°24.907'	H 1036m	MT271492
Triplophysa robusta-318	Triplophysa robusta sp1	Gansu Fisheries Research Institute	G0517	China	Gansu	Pingliang	Jingchuan	N 35°13.610'	E 107°24.907'	H 1036m	MT271492
Triplophysa robusta-319	Triplophysa robusta sp1	Gansu Fisheries Research Institute	G0518	China	Gansu	Pingliang	Jingchuan	N 35°13.610'	E 107°24.907'	H 1036m	MT271491
Triplophysa robusta-320	Triplophysa robusta sp1	Gansu Fisheries Research Institute	G0519	China	Gansu	Pingliang	Jingchuan	N 35°13.610'	E 107°24.907'	H 1036m	MT271491
Triplophysa robusta-321	Triplophysa robusta sp1	Gansu Fisheries Research Institute	G0520	China	Gansu	Pingliang	Jingchuan	N 35°13.610'	E 107°24.907'	H 1036m	MT271491
Triplophysa robusta-322	Triplophysa robusta sp1	Gansu Fisheries Research Institute	G0521	China	Gansu	Pingliang	Jingchuan	N 35°13.610'	E 107°24.907'	H 1036m	MT271492
Triplophysa robusta-323	Triplophysa robusta sp1	Gansu Fisheries Research Institute	G0522	China	Gansu	Pingliang	Jingchuan	N 35°13.610'	E 107°24.907'	H 1036m	MT271491
Triplophysa robusta-324	Triplophysa robusta sp1	Gansu Fisheries Research Institute	G0523	China	Gansu	Pingliang	Jingchuan	N 35°13.610'	E 107°24.907'	H 1036m	MT271491
Triplophysa robusta-325	Triplophysa robusta sp1	Gansu Fisheries Research Institute	G0524	China	Gansu	Pingliang	Jingchuan	N 35°13.610'	E 107°24.907'	H 1036m	MT271491
Triplophysa robusta-326	Triplophysa robusta sp1	Gansu Fisheries Research Institute	G0525	China	Gansu	Pingliang	Jingchuan	N 35°13.610'	E 107°24.907'	H 1036m	MT271491
Triplophysa robusta-327	Triplophysa robusta sp1	Gansu Fisheries Research Institute	G0526	China	Gansu	Pingliang	Jingchuan	N 35°13.610'	E 107°24.907'	H 1036m	MT271491
Triplophysa robusta-328	Triplophysa robusta sp1	Gansu Fisheries Research Institute	G0527	China	Gansu	Pingliang	Jingchuan	N 35°13.610'	E 107°24.907'	H 1036m	MT271491
Triplophysa robusta-329	Triplophysa robusta sp1	Gansu Fisheries Research Institute	G0528	China	Gansu	Pingliang	Jingchuan	N 35°13.610'	E 107°24.907'	H 1036m	MT271491
Triplophysa robusta-330	Triplophysa robusta sp1	Gansu Fisheries Research Institute	G0529	China	Gansu	Pingliang	Jingchuan	N 35°13.610'	E 107°24.907'	H 1036m	MT271491
Triplophysa robusta-331	Triplophysa robusta sp1	Gansu Fisheries Research Institute	G0530	China	Gansu	Pingliang	Jingchuan	N 35°13.610'	E 107°24.907'	H 1036m	MT271491
Triplophysa robusta-332	Triplophysa robusta sp1	Gansu Fisheries Research Institute	G0531	China	Gansu	Pingliang	Jingchuan	N 35°13.610'	E 107°24.907'	H 1036m	MT271491
Triplophysa robusta-333	Triplophysa robusta sp1	Gansu Fisheries Research Institute	G0532	China	Gansu	Pingliang	Jingchuan	N 35°13.610'	E 107°24.907'	H 1036m	MT271491
Triplophysa robusta-334	Triplophysa robusta sp1	Gansu Fisheries Research Institute	G0533	China	Gansu	Pingliang	Jingchuan	N 35°13.610'	E 107°24.907'	H 1036m	MT271492
Triplophysa robusta-335	Triplophysa robusta sp1	Gansu Fisheries Research Institute	G0534	China	Gansu	Pingliang	Jingchuan	N 35°13.610'	E 107°24.907'	H 1036m	MT271492
Triplophysa robusta-336	Triplophysa robusta sp1	Gansu Fisheries Research Institute	G0535	China	Gansu	Pingliang	Jingchuan	N 35°13.610'	E 107°24.907'	H 1036m	MT271492
Triplophysa robusta-337	Triplophysa robusta sp1	Gansu Fisheries Research Institute	G0536	China	Gansu	Pingliang	Jingchuan	N 35°13.610'	E 107°24.907'	H 1036m	MT271491
Triplophysa robusta-338	Triplophysa robusta sp1	Gansu Fisheries Research Institute	G0537	China	Gansu	Pingliang	Jingchuan	N 35°13.610'	E 107°24.907'	H 1036m	MT271491
Triplophysa robusta-339	Triplophysa robusta sp1	Gansu Fisheries Research Institute	G0538	China	Gansu	Pingliang	Jingchuan	N 35°13.610'	E 107°24.907'	H 1036m	MT271491
Triplophysa robusta-340	Triplophysa robusta sp1	Gansu Fisheries Research Institute	G0539	China	Gansu	Pingliang	Jingchuan	N 35°13.610'	E 107°24.907'	H 1036m	MT271491
Triplophysa robusta-341	Triplophysa robusta sp1	Gansu Fisheries Research Institute	G0540	China	Gansu	Pingliang	Jingchuan	N 35°13.610'	E 107°24.907'	H 1036m	MT271491
Triplophysa robusta-342	Triplophysa robusta sp1	Gansu Fisheries Research Institute	G0541	China	Gansu	Pingliang	Jingchuan	N 35°13.610'	E 107°24.907'	H 1036m	MT271491
Triplophysa robusta-343	Triplophysa robusta sp1	Gansu Fisheries Research Institute	G0542	China	Gansu	Pingliang	Jingchuan	N 35°13.610'	E 107°24.907'	H 1036m	MT271492
Triplophysa robusta-344	Triplophysa robusta sp1	Gansu Fisheries Research Institute	G0543	China	Gansu	Pingliang	Jingchuan	N 35°13.610'	E 107°24.907'	H 1036m	MT271491
Triplophysa robusta-345	Triplophysa robusta sp1	Gansu Fisheries Research Institute	G0544	China	Gansu	Pingliang	Jingchuan	N 35°13.610'	E 107°24.907'	H 1036m	MT271491
Triplophysa robusta-346	Triplophysa robusta sp1	Gansu Fisheries Research Institute	G0545	China	Gansu	Pingliang	Jingchuan	N 35°13.610'	E 107°24.907'	H 1036m	MT271491
Triplophysa robusta-347	Triplophysa robusta sp1	Gansu Fisheries Research Institute	G0546	China	Gansu	Pingliang	Jingchuan	N 35°13.610'	E 107°24.907'	H 1036m	MT271491
Triplophysa robusta-348	Triplophysa robusta sp1	Gansu Fisheries Research Institute	G0547	China	Gansu	Pingliang	Jingchuan	N 35°13.610'	E 107°24.907'	H 1036m	MT271492
Triplophysa robusta-349	Triplophysa robusta sp1	Gansu Fisheries Research Institute	G0548	China	Gansu	Pingliang	Jingchuan	N 35°13.610'	E 107°24.907'	H 1036m	MT271492
Triplophysa robusta-350	Triplophysa robusta sp1	Gansu Fisheries Research Institute	G0549	China	Gansu	Pingliang	Jingchuan	N 35°13.610'	E 107°24.907'	H 1036m	MT271491
Triplophysa robusta-351	Triplophysa robusta sp1	Gansu Fisheries Research Institute	G0550	China	Gansu	Pingliang	Jingchuan	N 35°13.610'	E 107°24.907'	H 1036m	MT271491
Triplophysa robusta-352	Triplophysa robusta sp1	Gansu Fisheries Research Institute	G0551	China	Gansu	Pingliang	Jingchuan	N 35°13.610'	E 107°24.907'	H 1036m	MT271491
Triplophysa robusta-413	Triplophysa robusta sp1	Gansu Fisheries Research Institute	G0612	China	Gansu	Pingliang	Jingchuan	N 35°22.964'	E 107°32.488'	H 976m	MT271491
Triplophysa robusta-257	Triplophysa robusta sp1	Gansu Fisheries Research Institute	G0456	China	Gansu	Pingliang	Kongtong	N 35°38.904'	E 106°30.453'	H 1553m	MT271491
Triplophysa robusta-258	Triplophysa robusta sp1	Gansu Fisheries Research Institute	G0457	China	Gansu	Pingliang	Kongtong	N 35°38.904'	E 106°30.453'	H 1553m	MT271491
Triplophysa robusta-259	Triplophysa robusta sp1	Gansu Fisheries Research Institute	G0458	China	Gansu	Pingliang	Kongtong	N 35°38.904'	E 106°30.453'	H 1553m	MT271491
Triplophysa robusta-260	Triplophysa robusta sp1	Gansu Fisheries Research Institute	G0459	China	Gansu	Pingliang	Kongtong	N 35°38.904'	E 106°30.453'	H 1553m	MT271491
Triplophysa robusta-261	Triplophysa robusta sp1	Gansu Fisheries Research Institute	G0460	China	Gansu	Pingliang	Kongtong	N 35°38.904'	E 106°30.453'	H 1553m	MT271495
Triplophysa robusta-262	Triplophysa robusta sp1	Gansu Fisheries Research Institute	G0461	China	Gansu	Pingliang	Kongtong	N 35°38.904'	E 106°30.453'	H 1553m	MT271491
Triplophysa robusta-359	Triplophysa robusta sp1	Gansu Fisheries Research Institute	G0558	China	Gansu	Pingliang	Kongtong	N 35°38.904'	E 106°30.453'	H 1553m	MT271491
Triplophysa robusta-397	Triplophysa robusta sp1	Gansu Fisheries Research Institute	G0596	China	Gansu	Pingliang	Kongtong	N 35°38.904'	E 106°30.453'	H 1553m	MT271491
Triplophysa robusta-401	Triplophysa robusta sp1	Gansu Fisheries Research Institute	G0600	China	Gansu	Pingliang	Kongtong	N 35°38.904'	E 106°30.453'	H 1553m	MT271491
Triplophysa robusta-402	Triplophysa robusta sp1	Gansu Fisheries Research Institute	G0601	China	Gansu	Pingliang	Kongtong	N 35°38.904'	E 106°30.453'	H 1553m	MT271491
Triplophysa robusta-404	Triplophysa robusta sp1	Gansu Fisheries Research Institute	G0603	China	Gansu	Pingliang	Kongtong	N 35°38.904'	E 106°30.453'	H 1553m	MT271491
Triplophysa robusta-279	Triplophysa robusta sp1	Gansu Fisheries Research Institute	G0478	China	Gansu	Pingliang	Lingtai	N 35°04.263'	E 107°35.728'	H 966m	MT271491
Triplophysa robusta-280	Triplophysa robusta sp1	Gansu Fisheries Research Institute	G0479	China	Gansu	Pingliang	Lingtai	N 35°04.263'	E 107°35.728'	H 966m	MT271491
Triplophysa robusta-281	Triplophysa robusta sp1	Gansu Fisheries Research Institute	G0480	China	Gansu	Pingliang	Lingtai	N 35°04.263'	E 107°35.728'	H 966m	MT271491
Triplophysa robusta-282	Triplophysa robusta sp1	Gansu Fisheries Research Institute	G0481	China	Gansu	Pingliang	Lingtai	N 35°04.263'	E 107°35.728'	H 966m	MT271491
Triplophysa robusta-283	Triplophysa robusta sp1	Gansu Fisheries Research Institute	G0482	China	Gansu	Pingliang	Lingtai	N 35°04.263'	E 107°35.728'	H 966m	MT271492
Triplophysa robusta-373	Triplophysa robusta sp1	Gansu Fisheries Research Institute	G0572	China	Gansu	Pingliang	Lingtai	N 35°04.263'	E 107°35.728'	H 966m	MT271492
Triplophysa robusta-374	Triplophysa robusta sp1	Gansu Fisheries Research Institute	G0573	China	Gansu	Pingliang	Lingtai	N 35°04.263'	E 107°35.728'	H 966m	MT271492
Triplophysa robusta-375	Triplophysa robusta sp1	Gansu Fisheries Research Institute	G0574	China	Gansu	Pingliang	Lingtai	N 35°04.263'	E 107°35.728'	H 966m	MT271496
Triplophysa robusta-376	Triplophysa robusta sp1	Gansu Fisheries Research Institute	G0575	China	Gansu	Pingliang	Lingtai	N 35°04.263'	E 107°35.728'	H 966m	MT271492
Triplophysa robusta-377	Triplophysa robusta sp1	Gansu Fisheries Research Institute	G0576	China	Gansu	Pingliang	Lingtai	N 35°04.263'	E 107°35.728'	H 966m	MT271491
Triplophysa robusta-398	Triplophysa robusta sp1	Gansu Fisheries Research Institute	G0597	China	Gansu	Pingliang	Lingtai	N 35°04.263'	E 107°35.728'	H 966m	MT271491
Triplophysa robusta-399	Triplophysa robusta sp1	Gansu Fisheries Research Institute	G0598	China	Gansu	Pingliang	Lingtai	N 35°04.263'	E 107°35.728'	H 966m	MT271491
Triplophysa robusta-290	Triplophysa robusta sp1	Gansu Fisheries Research Institute	G0489	China	Gansu	Qingyang	Ningxian	N 35°20.947'	E 107°44.482'	H 938m	MT271491
Triplophysa robusta-291	Triplophysa robusta sp1	Gansu Fisheries Research Institute	G0490	China	Gansu	Qingyang	Ningxian	N 35°20.947'	E 107°44.482'	H 938m	MT271492
Triplophysa robusta-292	Triplophysa robusta sp1	Gansu Fisheries Research Institute	G0491	China	Gansu	Qingyang	Ningxian	N 35°20.947'	E 107°44.482'	H 938m	MT271491
Triplophysa robusta-379	Triplophysa robusta sp1	Gansu Fisheries Research Institute	G0578	China	Gansu	Qingyang	Ningxian	N 35°20.947'	E 107°44.482'	H 938m	MT271491
Triplophysa robusta-380	Triplophysa robusta sp1	Gansu Fisheries Research Institute	G0579	China	Gansu	Qingyang	Ningxian	N 35°20.947'	E 107°44.482'	H 938m	MT271492
Triplophysa robusta-381	Triplophysa robusta sp1	Gansu Fisheries Research Institute	G0580	China	Gansu	Qingyang	Ningxian	N 35°20.947'	E 107°44.482'	H 938m	MT271492
Triplophysa robusta-271	Triplophysa robusta sp1	Gansu Fisheries Research Institute	G0470	China	Gansu	Qingyang	Xifeng	N 35°25.872'	E 107°40.397'	H 990m	MT271491
Triplophysa robusta-272	Triplophysa robusta sp1	Gansu Fisheries Research Institute	G0471	China	Gansu	Qingyang	Xifeng	N 35°25.872'	E 107°40.397'	H 990m	MT271491
Triplophysa robusta-273	Triplophysa robusta sp1	Gansu Fisheries Research Institute	G0472	China	Gansu	Qingyang	Xifeng	N 35°25.872'	E 107°40.397'	H 990m	MT271491
Triplophysa robusta-284	Triplophysa robusta sp1	Gansu Fisheries Research Institute	G0483	China	Gansu	Qingyang	Xifeng	N 35°25.872'	E 107°40.397'	H 990m	MT271491
Triplophysa robusta-285	Triplophysa robusta sp1	Gansu Fisheries Research Institute	G0484	China	Gansu	Qingyang	Xifeng	N 35°25.872'	E 107°40.397'	H 990m	MT271491
Triplophysa robusta-365	Triplophysa robusta sp1	Gansu Fisheries Research Institute	G0564	China	Gansu	Qingyang	Xifeng	N 35°25.872'	E 107°40.397'	H 990m	MT271491
Triplophysa robusta-366	Triplophysa robusta sp1	Gansu Fisheries Research Institute	G0565	China	Gansu	Qingyang	Xifeng	N 35°25.872'	E 107°40.397'	H 990m	MT271492
Triplophysa robusta-409	Triplophysa robusta sp1	Gansu Fisheries Research Institute	G0608	China	Gansu	Qingyang	Xifeng	N 35°25.872'	E 107°40.397'	H 990m	MT271505
Triplophysa robusta-296	Triplophysa robusta sp1	Gansu Fisheries Research Institute	G0495	China	Gansu	Qingyang	Zhengning	N 35°23.078'	E 108°29.535'	H 1243m	MT271491
Triplophysa robusta-297	Triplophysa robusta sp1	Gansu Fisheries Research Institute	G0496	China	Gansu	Qingyang	Zhengning	N 35°23.078'	E 108°29.535'	H 1243m	MT271491
Triplophysa robusta-298	Triplophysa robusta sp1	Gansu Fisheries Research Institute	G0497	China	Gansu	Qingyang	Zhengning	N 35°23.078'	E 108°29.535'	H 1243m	MT271491
Triplophysa robusta-392	Triplophysa robusta sp1	Gansu Fisheries Research Institute	G0591	China	Gansu	Qingyang	Zhengning	N 35°23.078'	E 108°29.535'	H 1243m	MT271491
Triplophysa robusta-393	Triplophysa robusta sp1	Gansu Fisheries Research Institute	G0592	China	Gansu	Qingyang	Zhengning	N 35°23.078'	E 108°29.535'	H 1243m	MT271491
Triplophysa robusta-394	Triplophysa robusta sp1	Gansu Fisheries Research Institute	G0593	China	Gansu	Qingyang	Zhengning	N 35°23.078'	E 108°29.535'	H 1243m	MT271492
Triplophysa robusta-408	Triplophysa robusta sp1	Gansu Fisheries Research Institute	G0607	China	Gansu	Qingyang	Zhengning	N 35°23.078'	E 108°29.535'	H 1243m	MT271492
Triplophysa robusta-412	Triplophysa robusta sp1	Gansu Fisheries Research Institute	G0611	China	Gansu	Qingyang	Zhengning	N 35°23.078'	E 108°29.535'	H 1243m	MT271491
Triplophysa robusta-274	Triplophysa robusta sp1	Gansu Fisheries Research Institute	G0473	China	Gansu	Qingyang	Zhengning	N 35°26.391'	E 108°24.442'	H 1172m	MT271491
Triplophysa robusta-275	Triplophysa robusta sp1	Gansu Fisheries Research Institute	G0474	China	Gansu	Qingyang	Zhengning	N 35°26.391'	E 108°24.442'	H 1172m	MT271492
Triplophysa robusta-276	Triplophysa robusta sp1	Gansu Fisheries Research Institute	G0475	China	Gansu	Qingyang	Zhengning	N 35°26.391'	E 108°24.442'	H 1172m	MT271492
Triplophysa robusta-277	Triplophysa robusta sp1	Gansu Fisheries Research Institute	G0476	China	Gansu	Qingyang	Zhengning	N 35°26.391'	E 108°24.442'	H 1172m	MT271492
Triplophysa robusta-278	Triplophysa robusta sp1	Gansu Fisheries Research Institute	G0477	China	Gansu	Qingyang	Zhengning	N 35°26.391'	E 108°24.442'	H 1172m	MT271492
Triplophysa robusta-293	Triplophysa robusta sp1	Gansu Fisheries Research Institute	G0492	China	Gansu	Qingyang	Zhengning	N 35°26.391'	E 108°24.442'	H 1172m	MT271492
Triplophysa robusta-367	Triplophysa robusta sp1	Gansu Fisheries Research Institute	G0566	China	Gansu	Qingyang	Zhengning	N 35°26.391'	E 108°24.442'	H 1172m	MT271492
Triplophysa robusta-368	Triplophysa robusta sp1	Gansu Fisheries Research Institute	G0567	China	Gansu	Qingyang	Zhengning	N 35°26.391'	E 108°24.442'	H 1172m	MT271492
Triplophysa robusta-369	Triplophysa robusta sp1	Gansu Fisheries Research Institute	G0568	China	Gansu	Qingyang	Zhengning	N 35°26.391'	E 108°24.442'	H 1172m	MT271492
Triplophysa robusta-370	Triplophysa robusta sp1	Gansu Fisheries Research Institute	G0569	China	Gansu	Qingyang	Zhengning	N 35°26.391'	E 108°24.442'	H 1172m	MT271492
Triplophysa robusta-371	Triplophysa robusta sp1	Gansu Fisheries Research Institute	G0570	China	Gansu	Qingyang	Zhengning	N 35°26.391'	E 108°24.442'	H 1172m	MT271492
Triplophysa robusta-372	Triplophysa robusta sp1	Gansu Fisheries Research Institute	G0571	China	Gansu	Qingyang	Zhengning	N 35°26.391'	E 108°24.442'	H 1172m	MT271497
Triplophysa robusta-382	Triplophysa robusta sp1	Gansu Fisheries Research Institute	G0581	China	Gansu	Qingyang	Zhengning	N 35°26.391'	E 108°24.442'	H 1172m	MT271491
Triplophysa robusta-383	Triplophysa robusta sp1	Gansu Fisheries Research Institute	G0582	China	Gansu	Qingyang	Zhengning	N 35°26.391'	E 108°24.442'	H 1172m	MT271491
Triplophysa robusta-384	Triplophysa robusta sp1	Gansu Fisheries Research Institute	G0583	China	Gansu	Qingyang	Zhengning	N 35°26.391'	E 108°24.442'	H 1172m	MT271491
Triplophysa robusta-385	Triplophysa robusta sp1	Gansu Fisheries Research Institute	G0584	China	Gansu	Qingyang	Zhengning	N 35°26.391'	E 108°24.442'	H 1172m	MT271491
Triplophysa robusta-386	Triplophysa robusta sp1	Gansu Fisheries Research Institute	G0585	China	Gansu	Qingyang	Zhengning	N 35°26.391'	E 108°24.442'	H 1172m	MT271491
Triplophysa robusta-387	Triplophysa robusta sp1	Gansu Fisheries Research Institute	G0586	China	Gansu	Qingyang	Zhengning	N 35°26.391'	E 108°24.442'	H 1172m	MT271491
Triplophysa robusta-410	Triplophysa robusta sp1	Gansu Fisheries Research Institute	G0609	China	Gansu	Qingyang	Zhengning	N 35°26.391'	E 108°24.442'	H 1172m	MT271491
Triplophysa robusta-294	Triplophysa robusta sp1	Gansu Fisheries Research Institute	G0493	China	Gansu	Qingyang	Zhenyuan	N 35°44.138'	E 107°06.320'	H 1195m	MT271492
Triplophysa robusta-361	Triplophysa robusta sp1	Gansu Fisheries Research Institute	G0560	China	Gansu	Qingyang	Zhenyuan	N 35°44.138'	E 107°06.320'	H 1195m	MT271491
Triplophysa robusta-388	Triplophysa robusta sp1	Gansu Fisheries Research Institute	G0587	China	Gansu	Qingyang	Zhenyuan	N 35°44.138'	E 107°06.320'	H 1195m	MT271491
Triplophysa robusta-407	Triplophysa robusta sp1	Gansu Fisheries Research Institute	G0606	China	Gansu	Qingyang	Zhenyuan	N 35°44.138'	E 107°06.320'	H 1195m	MT271491
Triplophysa scleroptera-004	Triplophysa scleroptera	Gansu Fisheries Research Institute	GS0228	China	Gansu	Gannan	Hezuo	N 34°40.451'	E 103°00.445'	H 2808m	MT271516
Triplophysa scleroptera-005	Triplophysa scleroptera	Gansu Fisheries Research Institute	GS0229	China	Gansu	Gannan	Hezuo	N 34°40.451'	E 103°00.445'	H 2808m	MT271516
Triplophysa scleroptera-006	Triplophysa scleroptera	Gansu Fisheries Research Institute	GS0230	China	Gansu	Gannan	Hezuo	N 34°40.451'	E 103°00.445'	H 2808m	MT271516
Triplophysa scleroptera-043	Triplophysa scleroptera	Gansu Fisheries Research Institute	GS0267	China	Gansu	Lanzhou	Honggu	N 36°22.596'	E 102°51.085'	H 2102m	MT271518
Triplophysa scleroptera-011	Triplophysa scleroptera	Gansu Fisheries Research Institute	GS0235	China	Gansu	Gannan	Luqu	N 34°28.798'	E 102°41.403'	H 3026m	MT271516
Triplophysa scleroptera-012	Triplophysa scleroptera	Gansu Fisheries Research Institute	GS0236	China	Gansu	Gannan	Luqu	N 34°28.798'	E 102°41.403'	H 3026m	MT271516
Triplophysa scleroptera-008	Triplophysa scleroptera	Gansu Fisheries Research Institute	GS0232	China	Qinghai	Haibei	Menyuan	N 37°27.445'	E 101°25.495'	H 2934m	MT271516
Triplophysa scleroptera-009	Triplophysa scleroptera	Gansu Fisheries Research Institute	GS0233	China	Qinghai	Haibei	Menyuan	N 37°27.445'	E 101°25.495'	H 2934m	MT271516
Triplophysa scleroptera-010	Triplophysa scleroptera	Gansu Fisheries Research Institute	GS0234	China	Qinghai	Haibei	Menyuan	N 37°27.445'	E 101°25.495'	H 2934m	MT271516
Triplophysa scleroptera-016	Triplophysa scleroptera	Gansu Fisheries Research Institute	GS0240	China	Gansu	Dingxi	Minxian	N 34°24.162'	E 104°04.066'	H 2345m	MT271516
Triplophysa scleroptera-013	Triplophysa scleroptera	Gansu Fisheries Research Institute	GS0237	China	Gansu	Gannan	Xiahe	N 34°51.126'	E 102° 7.922'	H 3490m	MT271516
Triplophysa scleroptera-014	Triplophysa scleroptera	Gansu Fisheries Research Institute	GS0238	China	Gansu	Gannan	Xiahe	N 34°51.126'	E 102° 7.922'	H 3490m	MT271516
Triplophysa scleroptera-015	Triplophysa scleroptera	Gansu Fisheries Research Institute	GS0239	China	Gansu	Gannan	Xiahe	N 34°51.126'	E 102° 7.922'	H 3490m	MT271516
Triplophysa scleroptera-001	Triplophysa scleroptera	Gansu Fisheries Research Institute	GS0225	China	Gansu	Lanzhou	Yongchang	N 36°18.697'	E 103°25.040'	H 2066m	MT271516
Triplophysa scleroptera-003	Triplophysa scleroptera	Gansu Fisheries Research Institute	GS0227	China	Gansu	Linxia	Yongjing	N 35°49.630'	E 103°09.113'	H 1729m	MT271516
Triplophysa scleroptera-002	Triplophysa scleroptera	Gansu Fisheries Research Institute	GS0226	China	Gansu	Lanzhou	Yuzhong	N 35°51.857'	E 104°00.827'	H 2094m	MT271516
Triplophysa scleroptera-007	Triplophysa scleroptera	Gansu Fisheries Research Institute	GS0231	China	Gansu	Gannan	Zhuoni	N 34°37.107'	E 103°11.066'	H 2718m	MT271516
Triplophysa scleroptera-017	Triplophysa scleroptera	Gansu Fisheries Research Institute	GS0241	China	Gansu	Gannan	Zhuoni	N 34°59.590'	E 103°48.918'	H 2085m	MT271516
Triplophysa scleroptera-018	Triplophysa scleroptera	Gansu Fisheries Research Institute	GS0242	China	Gansu	Gannan	Zhuoni	N 34°59.590'	E 103°48.918'	H 2085m	MT271516
Triplophysa scleroptera-019	Triplophysa scleroptera	Gansu Fisheries Research Institute	GS0243	China	Gansu	Gannan	Zhuoni	N 34°59.590'	E 103°48.918'	H 2085m	MT271516
Triplophysa scleroptera-020	Triplophysa scleroptera	Gansu Fisheries Research Institute	GS0244	China	Gansu	Gannan	Zhuoni	N 34°59.590'	E 103°48.918'	H 2085m	MT271516
Triplophysa scleroptera-021	Triplophysa scleroptera	Gansu Fisheries Research Institute	GS0245	China	Gansu	Gannan	Zhuoni	N 34°59.590'	E 103°48.918'	H 2085m	MT271516
Triplophysa scleroptera-022	Triplophysa scleroptera	Gansu Fisheries Research Institute	GS0246	China	Gansu	Gannan	Zhuoni	N 34°59.590'	E 103°48.918'	H 2085m	MT271516
Triplophysa scleroptera-023	Triplophysa scleroptera	Gansu Fisheries Research Institute	GS0247	China	Gansu	Gannan	Zhuoni	N 34°59.590'	E 103°48.918'	H 2085m	MT271516
Triplophysa scleroptera-024	Triplophysa scleroptera	Gansu Fisheries Research Institute	GS0248	China	Gansu	Gannan	Zhuoni	N 34°59.590'	E 103°48.918'	H 2085m	MT271516
Triplophysa scleroptera-025	Triplophysa scleroptera	Gansu Fisheries Research Institute	GS0249	China	Gansu	Gannan	Zhuoni	N 34°59.590'	E 103°48.918'	H 2085m	MT271516
Triplophysa scleroptera-026	Triplophysa scleroptera	Gansu Fisheries Research Institute	GS0250	China	Gansu	Gannan	Zhuoni	N 34°59.590'	E 103°48.918'	H 2085m	MT271516
Triplophysa scleroptera-027	Triplophysa scleroptera	Gansu Fisheries Research Institute	GS0251	China	Gansu	Gannan	Zhuoni	N 34°59.590'	E 103°48.918'	H 2085m	MT271516
Triplophysa scleroptera-028	Triplophysa scleroptera	Gansu Fisheries Research Institute	GS0252	China	Gansu	Gannan	Zhuoni	N 34°59.590'	E 103°48.918'	H 2085m	MT271516
Triplophysa scleroptera-029	Triplophysa scleroptera	Gansu Fisheries Research Institute	GS0253	China	Gansu	Gannan	Zhuoni	N 34°59.590'	E 103°48.918'	H 2085m	MT271517
Triplophysa scleroptera-030	Triplophysa scleroptera	Gansu Fisheries Research Institute	GS0254	China	Gansu	Gannan	Zhuoni	N 34°59.590'	E 103°48.918'	H 2085m	MT271516
Triplophysa scleroptera-031	Triplophysa scleroptera	Gansu Fisheries Research Institute	GS0255	China	Gansu	Gannan	Zhuoni	N 34°59.590'	E 103°48.918'	H 2085m	MT271516
Triplophysa scleroptera-032	Triplophysa scleroptera	Gansu Fisheries Research Institute	GS0256	China	Gansu	Gannan	Zhuoni	N 34°59.590'	E 103°48.918'	H 2085m	MT271516
Triplophysa scleroptera-033	Triplophysa scleroptera	Gansu Fisheries Research Institute	GS0257	China	Gansu	Gannan	Zhuoni	N 34°59.590'	E 103°48.918'	H 2085m	MT271516
Triplophysa scleroptera-034	Triplophysa scleroptera	Gansu Fisheries Research Institute	GS0258	China	Gansu	Gannan	Zhuoni	N 34°59.590'	E 103°48.918'	H 2085m	MT271516
Triplophysa scleroptera-035	Triplophysa scleroptera	Gansu Fisheries Research Institute	GS0259	China	Gansu	Gannan	Zhuoni	N 34°59.590'	E 103°48.918'	H 2085m	MT271516
Triplophysa scleroptera-036	Triplophysa scleroptera	Gansu Fisheries Research Institute	GS0260	China	Gansu	Gannan	Zhuoni	N 34°59.590'	E 103°48.918'	H 2085m	MT271516
Triplophysa scleroptera-037	Triplophysa scleroptera	Gansu Fisheries Research Institute	GS0261	China	Sichuan	Aba	Hongyuan	N 34°9.002'	E 100°27.022'	H 3917m	MT271516
Triplophysa scleroptera-038	Triplophysa scleroptera	Gansu Fisheries Research Institute	GS0262	China	Qinghai	Guoluo	Banma	N 34°32.562'	E 100°56.521'	H 3245m	MT271516
Triplophysa scleroptera-039	Triplophysa scleroptera	Gansu Fisheries Research Institute	GS0263	China	Qinghai	Guoluo	Banma	N 34°32.562'	E 100°56.521'	H 3245m	MT271516
Triplophysa scleroptera-040	Triplophysa scleroptera	Gansu Fisheries Research Institute	GS0264	China	Qinghai	Hainan	Gonghe	N 36°7.417'	E 100°57.018'	H 2572m	MT271516
Triplophysa scleroptera-041	Triplophysa scleroptera	Gansu Fisheries Research Institute	GS0265	China	Qinghai	Hainan	Gonghe	N 36°7.417'	E 100°57.018'	H 2572m	MT271516
Triplophysa scleroptera-042	Triplophysa scleroptera	Gansu Fisheries Research Institute	GS0266	China	Qinghai	Hainan	Gonghe	N 36°7.417'	E 100°57.018'	H 2572m	MT271516
Triplophysa scleroptera-044	Triplophysa scleroptera	Gansu Fisheries Research Institute	GS0268	China	Qinghai	Hainan	Gonghe	N 36°7.417'	E 100°57.018'	H 2572m	MT271516
Triplophysa sellaefer-009	Triplophysa sellaefer	Gansu Fisheries Research Institute	GS0548	China	Gansu	Qingyang	Heshui	N 36°12.741'	E 108°29.775'	H 1178m	MT271519
Triplophysa sellaefer-010	Triplophysa sellaefer	Gansu Fisheries Research Institute	GS0549	China	Gansu	Qingyang	Heshui	N 36°12.741'	E 108°29.775'	H 1178m	MT271519
Triplophysa sellaefer-011	Triplophysa sellaefer	Gansu Fisheries Research Institute	GS0550	China	Gansu	Qingyang	Heshui	N 36°12.741'	E 108°29.775'	H 1178m	MT271519
Triplophysa sellaefer-012	Triplophysa sellaefer	Gansu Fisheries Research Institute	GS0551	China	Gansu	Qingyang	Heshui	N 36°12.741'	E 108°29.775'	H 1178m	MT271523
Triplophysa sellaefer-013	Triplophysa sellaefer	Gansu Fisheries Research Institute	GS0552	China	Gansu	Qingyang	Heshui	N 36°12.741'	E 108°29.775'	H 1178m	MT271519
Triplophysa sellaefer-014	Triplophysa sellaefer	Gansu Fisheries Research Institute	GS0553	China	Gansu	Qingyang	Heshui	N 36°12.741'	E 108°29.775'	H 1178m	MT271519
Triplophysa sellaefer-015	Triplophysa sellaefer	Gansu Fisheries Research Institute	GS0554	China	Gansu	Qingyang	Heshui	N 36°12.741'	E 108°29.775'	H 1178m	MT271519
Triplophysa sellaefer-016	Triplophysa sellaefer	Gansu Fisheries Research Institute	GS0555	China	Gansu	Qingyang	Heshui	N 36°12.741'	E 108°29.775'	H 1178m	MT271522
Triplophysa sellaefer-017	Triplophysa sellaefer	Gansu Fisheries Research Institute	GS0556	China	Gansu	Qingyang	Heshui	N 36°12.741'	E 108°29.775'	H 1178m	MT271519
Triplophysa sellaefer-018	Triplophysa sellaefer	Gansu Fisheries Research Institute	GS0557	China	Gansu	Qingyang	Heshui	N 36°12.741'	E 108°29.775'	H 1178m	MT271519
Triplophysa sellaefer-001	Triplophysa sellaefer	Gansu Fisheries Research Institute	GS0540	China	Gansu	Qingyang	Huachi	N 36°14.727'	E 108°27.542'	H 1198m	MT271519
Triplophysa sellaefer-002	Triplophysa sellaefer	Gansu Fisheries Research Institute	GS0541	China	Gansu	Qingyang	Huachi	N 36°14.727'	E 108°27.542'	H 1198m	MT271521
Triplophysa sellaefer-003	Triplophysa sellaefer	Gansu Fisheries Research Institute	GS0542	China	Gansu	Qingyang	Huachi	N 36°14.727'	E 108°27.542'	H 1198m	MT271519
Triplophysa sellaefer-004	Triplophysa sellaefer	Gansu Fisheries Research Institute	GS0543	China	Gansu	Qingyang	Huachi	N 36°14.727'	E 108°27.542'	H 1198m	MT271520
Triplophysa sellaefer-005	Triplophysa sellaefer	Gansu Fisheries Research Institute	GS0544	China	Gansu	Qingyang	Huachi	N 36°14.727'	E 108°27.542'	H 1198m	MT271519
Triplophysa sellaefer-006	Triplophysa sellaefer	Gansu Fisheries Research Institute	GS0545	China	Gansu	Qingyang	Huachi	N 36°14.727'	E 108°27.542'	H 1198m	MT271519
Triplophysa sellaefer-007	Triplophysa sellaefer	Gansu Fisheries Research Institute	GS0546	China	Gansu	Qingyang	Huachi	N 36°14.727'	E 108°27.542'	H 1198m	MT271519
Triplophysa sellaefer-008	Triplophysa sellaefer	Gansu Fisheries Research Institute	GS0547	China	Gansu	Qingyang	Huachi	N 36°14.727'	E 108°27.542'	H 1198m	MT271519
Triplophysa sellaefer-019	Triplophysa sellaefer	Gansu Fisheries Research Institute	GS0558	China	Gansu	Qingyang	Huachi	N 36°14.727'	E 108°27.542'	H 1198m	MT271519
Triplophysa sellaefer-020	Triplophysa sellaefer	Gansu Fisheries Research Institute	GS0559	China	Gansu	Qingyang	Huachi	N 36°14.727'	E 108°27.542'	H 1198m	MT271519
Triplophysa sellaefer-021	Triplophysa sellaefer	Gansu Fisheries Research Institute	GS0560	China	Gansu	Qingyang	Huachi	N 36°14.727'	E 108°27.542'	H 1198m	MT271519
Triplophysa sellaefer-022	Triplophysa sellaefer	Gansu Fisheries Research Institute	GS0561	China	Gansu	Qingyang	Huachi	N 36°14.727'	E 108°27.542'	H 1198m	MT271519
Triplophysa shiyangensis-022	Triplophysa shiyangensis	Gansu Fisheries Research Institute	GS0432	China	Gansu	Wuwei	Huangcheng	N 38° 2.807'	E 101°57.428'	H 2465m	MT271525
Triplophysa shiyangensis-023	Triplophysa shiyangensis	Gansu Fisheries Research Institute	GS0433	China	Gansu	Wuwei	Huangcheng	N 38° 2.807'	E 101°57.428'	H 2465m	MT271532
Triplophysa shiyangensis-004	Triplophysa shiyangensis	Gansu Fisheries Research Institute	GS0414	China	Gansu	Wuwei	Maozang	N 37°30.962'	E 102°25.906'	H 2626m	MT271526
Triplophysa shiyangensis-005	Triplophysa shiyangensis	Gansu Fisheries Research Institute	GS0415	China	Gansu	Wuwei	Maozang	N 37°30.962'	E 102°25.906'	H 2626m	MT271526
Triplophysa shiyangensis-015	Triplophysa shiyangensis	Gansu Fisheries Research Institute	GS0425	China	Gansu	Wuwei	Maozang	N 37°30.962'	E 102°25.906'	H 2626m	MT271526
Triplophysa shiyangensis-016	Triplophysa shiyangensis	Gansu Fisheries Research Institute	GS0426	China	Gansu	Wuwei	Maozang	N 37°30.962'	E 102°25.906'	H 2626m	MT271526
Triplophysa shiyangensis-017	Triplophysa shiyangensis	Gansu Fisheries Research Institute	GS0427	China	Gansu	Wuwei	Maozang	N 37°30.962'	E 102°25.906'	H 2626m	MT271531
Triplophysa shiyangensis-018	Triplophysa shiyangensis	Gansu Fisheries Research Institute	GS0428	China	Gansu	Wuwei	Maozang	N 37°30.962'	E 102°25.906'	H 2626m	MT271531
Triplophysa shiyangensis-019	Triplophysa shiyangensis	Gansu Fisheries Research Institute	GS0429	China	Gansu	Wuwei	Maozang	N 37°30.962'	E 102°25.906'	H 2626m	MT271526
Triplophysa shiyangensis-021	Triplophysa shiyangensis	Gansu Fisheries Research Institute	GS0431	China	Gansu	Wuwei	Maozang	N 37°30.962'	E 102°25.906'	H 2626m	MT271526
Triplophysa shiyangensis-001	Triplophysa shiyangensis	Gansu Fisheries Research Institute	GS0411	China	Gansu	Jinchang	Yongchang	N 38° 3.592'	E 101°23.607'	H 2835m	MT271526
Triplophysa shiyangensis-002	Triplophysa shiyangensis	Gansu Fisheries Research Institute	GS0412	China	Gansu	Jinchang	Yongchang	N 38° 3.592'	E 101°23.607'	H 2835m	MT271529
Triplophysa shiyangensis-003	Triplophysa shiyangensis	Gansu Fisheries Research Institute	GS0413	China	Gansu	Jinchang	Yongchang	N 38° 3.592'	E 101°23.607'	H 2835m	MT271526
Triplophysa shiyangensis-006	Triplophysa shiyangensis	Gansu Fisheries Research Institute	GS0416	China	Gansu	Jinchang	Yongchang	N 38° 3.592'	E 101°23.607'	H 2835m	MT271526
Triplophysa shiyangensis-007	Triplophysa shiyangensis	Gansu Fisheries Research Institute	GS0417	China	Gansu	Jinchang	Yongchang	N 38° 3.592'	E 101°23.607'	H 2835m	MT271526
Triplophysa shiyangensis-008	Triplophysa shiyangensis	Gansu Fisheries Research Institute	GS0418	China	Gansu	Wuwei	Yongchang	N 38°19.887'	E 102° 1.632'	H 1827m	MT271526
Triplophysa shiyangensis-009	Triplophysa shiyangensis	Gansu Fisheries Research Institute	GS0419	China	Gansu	Wuwei	Yongchang	N 38°19.887'	E 102° 1.632'	H 1827m	MT271530
Triplophysa shiyangensis-010	Triplophysa shiyangensis	Gansu Fisheries Research Institute	GS0420	China	Gansu	Wuwei	Yongchang	N 38°19.887'	E 102° 1.632'	H 1827m	MT271533
Triplophysa shiyangensis-011	Triplophysa shiyangensis	Gansu Fisheries Research Institute	GS0421	China	Gansu	Wuwei	Yongchang	N 38°19.887'	E 102° 1.632'	H 1827m	MT271534
Triplophysa shiyangensis-012	Triplophysa shiyangensis	Gansu Fisheries Research Institute	GS0422	China	Gansu	Wuwei	Yongchang	N 38°19.887'	E 102° 1.632'	H 1827m	MT271534
Triplophysa shiyangensis-013	Triplophysa shiyangensis	Gansu Fisheries Research Institute	GS0423	China	Gansu	Jinchang	Yongchang	N 38°19.887'	E 102° 1.632'	H 1827m	MT271524
Triplophysa shiyangensis-014	Triplophysa shiyangensis	Gansu Fisheries Research Institute	GS0424	China	Gansu	Jinchang	Yongchang	N 38°19.887'	E 102° 1.632'	H 1827m	MT271527
Triplophysa shiyangensis-020	Triplophysa shiyangensis	Gansu Fisheries Research Institute	GS0430	China	Gansu	Wuwei	Yongchang	N 38°19.887'	E 102° 1.632'	H 1827m	MT271526
Triplophysa shiyangensis-024	Triplophysa shiyangensis	Gansu Fisheries Research Institute	GS0434	China	Gansu	Wuwei	Yongchang	N 38°19.887'	E 102° 1.632'	H 1827m	MT271528
Triplophysa shiyangensis-025	Triplophysa shiyangensis	Gansu Fisheries Research Institute	GS0435	China	Gansu	Wuwei	Yongchang	N 38°19.887'	E 102° 1.632'	H 1827m	MT271528
Triplophysa siluroides-022	Triplophysa siluroides	Gansu Fisheries Research Institute	G0889	China	Gansu	Linxia	Linxia	N 35°28.278'	E 103° 2.238'	H 2076m	MT271444
Triplophysa siluroides-023	Triplophysa siluroides	Gansu Fisheries Research Institute	G0890	China	Gansu	Linxia	Linxia	N 35°28.278'	E 103° 2.238'	H 2076m	MT271444
Triplophysa siluroides-016	Triplophysa siluroides	Gansu Fisheries Research Institute	G0883	China	Gansu	Hezuo	Maqu	N 33°46.728'	E 102°06.982'	H 3447m	MT271444
Triplophysa siluroides-017	Triplophysa siluroides	Gansu Fisheries Research Institute	G0884	China	Gansu	Hezuo	Maqu	N 33°46.728'	E 102°06.982'	H 3447m	MT271444
Triplophysa siluroides-018	Triplophysa siluroides	Gansu Fisheries Research Institute	G0885	China	Gansu	Hezuo	Maqu	N 33°46.728'	E 102°06.982'	H 3447m	MT271535
Triplophysa siluroides-019	Triplophysa siluroides	Gansu Fisheries Research Institute	G0886	China	Gansu	Hezuo	Maqu	N 33°46.728'	E 102°06.982'	H 3447m	MT271535
Triplophysa siluroides-020	Triplophysa siluroides	Gansu Fisheries Research Institute	G0887	China	Gansu	Hezuo	Maqu	N 33°46.728'	E 102°06.982'	H 3447m	MT271536
Triplophysa siluroides-021	Triplophysa siluroides	Gansu Fisheries Research Institute	G0888	China	Gansu	Hezuo	Maqu	N 33°46.728'	E 102°06.982'	H 3447m	MT271535
Triplophysa siluroides-024	Triplophysa siluroides	Gansu Fisheries Research Institute	G0891	China	Qinghai	Haibei	Menyuan	N 37°27.445'	E 101°25.495'	H 2934m	MT271535
Triplophysa siluroides-025	Triplophysa siluroides	Gansu Fisheries Research Institute	G0892	China	Qinghai	Haibei	Menyuan	N 37°27.445'	E 101°25.495'	H 2934m	MT271535
Triplophysa siluroides-026	Triplophysa siluroides	Gansu Fisheries Research Institute	G0893	China	Qinghai	Haibei	Menyuan	N 37°27.445'	E 101°25.495'	H 2934m	MT271535
Triplophysa siluroides-002	Triplophysa siluroides	Gansu Fisheries Research Institute	G0869	China	Gansu	Dingxi	Minxian	N 34°24.162'	E 104°04.066'	H 2345m	MT271535
Triplophysa siluroides-003	Triplophysa siluroides	Gansu Fisheries Research Institute	G0870	China	Gansu	Dingxi	Minxian	N 34°24.162'	E 104°04.066'	H 2345m	MT271535
Triplophysa siluroides-004	Triplophysa siluroides	Gansu Fisheries Research Institute	G0871	China	Gansu	Dingxi	Minxian	N 34°24.162'	E 104°04.066'	H 2345m	MT271536
Triplophysa siluroides-005	Triplophysa siluroides	Gansu Fisheries Research Institute	G0872	China	Gansu	Dingxi	Minxian	N 34°24.162'	E 104°04.066'	H 2345m	MT271535
Triplophysa siluroides-006	Triplophysa siluroides	Gansu Fisheries Research Institute	G0873	China	Gansu	Dingxi	Minxian	N 34°24.162'	E 104°04.066'	H 2345m	MT271538
Triplophysa siluroides-007	Triplophysa siluroides	Gansu Fisheries Research Institute	G0874	China	Gansu	Dingxi	Minxian	N 34°24.162'	E 104°04.066'	H 2345m	MT271446
Triplophysa siluroides-008	Triplophysa siluroides	Gansu Fisheries Research Institute	G0875	China	Gansu	Dingxi	Minxian	N 34°24.162'	E 104°04.066'	H 2345m	MT271535
Triplophysa siluroides-009	Triplophysa siluroides	Gansu Fisheries Research Institute	G0876	China	Gansu	Dingxi	Minxian	N 34°24.162'	E 104°04.066'	H 2345m	MT271535
Triplophysa siluroides-001	Triplophysa siluroides	Gansu Fisheries Research Institute	G0868	China	Gansu	Baiyin	Wufo	N 37°20.509'	E 104°23.686'	H 2115m	MT271539
Triplophysa siluroides-027	Triplophysa siluroides	Gansu Fisheries Research Institute	G0894	China	Gansu	Linxia	Yongjing	N 35°49.630'	E 103°09.113'	H 1729m	MT271535
Triplophysa siluroides-010	Triplophysa siluroides	Gansu Fisheries Research Institute	G0877	China	Gansu	Gannan	Zhuoni	N 34°59.590'	E 103°48.918'	H 2085m	MT271535
Triplophysa siluroides-011	Triplophysa siluroides	Gansu Fisheries Research Institute	G0878	China	Gansu	Gannan	Zhuoni	N 34°59.590'	E 103°48.918'	H 2085m	MT271535
Triplophysa siluroides-012	Triplophysa siluroides	Gansu Fisheries Research Institute	G0879	China	Gansu	Gannan	Zhuoni	N 34°59.590'	E 103°48.918'	H 2085m	MT271535
Triplophysa siluroides-013	Triplophysa siluroides	Gansu Fisheries Research Institute	G0880	China	Gansu	Gannan	Zhuoni	N 34°59.590'	E 103°48.918'	H 2085m	MT271535
Triplophysa siluroides-014	Triplophysa siluroides	Gansu Fisheries Research Institute	G0881	China	Gansu	Gannan	Zhuoni	N 34°59.590'	E 103°48.918'	H 2085m	MT271535
Triplophysa siluroides-015	Triplophysa siluroides	Gansu Fisheries Research Institute	G0882	China	Gansu	Gannan	Zhuoni	N 34°59.590'	E 103°48.918'	H 2085m	MT271535
Triplophysa siluroides-028	Triplophysa siluroides	Gansu Fisheries Research Institute	G0895	China	Gansu	Gannan	Zhuoni	N 34°59.590'	E 103°48.918'	H 2085m	MT271535
Triplophysa sp1-001	Triplophysa sp1	Gansu Fisheries Research Institute	GS0562	China	Gansu	Longnan	Wudu	N 33°16.390'	E 105°11.378'	H 1949m	MT271540
Triplophysa sp1-003	Triplophysa sp1	Gansu Fisheries Research Institute	GS0564	China	Gansu	Longnan	Wudu	N 33°16.390'	E 105°11.378'	H 1949m	MT271540
Triplophysa sp1-002	Triplophysa sp1	Gansu Fisheries Research Institute	GS0563	China	Gansu	Lanzhou	Yongchang	N 36°18.697'	E 103°25.040'	H 2066m	MT271541
Triplophysa sp2-034	Triplophysa sp2	Gansu Fisheries Research Institute	GS0598	China	Gansu	Gannan	Hezuo	N 34°40.451'	E 103°00.445'	H 2808m	MT271398
Triplophysa sp2-065	Triplophysa sp2	Gansu Fisheries Research Institute	GS0629	China	Gansu	Longnan	Kangxian	N 33°11.031'	E 105°47.287'	H 1949m	MT271397
Triplophysa sp2-033	Triplophysa sp2	Gansu Fisheries Research Institute	GS0597	China	Gansu	Longnan	Kangxian	N 33°26.880'	E 105°24.792'	H 1230m	MT271397
Triplophysa sp2-001	Triplophysa sp2	Gansu Fisheries Research Institute	GS0565	China	Gansu	Longnan	Liangdang	N 33°55.939'	E 106°25.613'	H 1891m	MT271402
Triplophysa sp2-002	Triplophysa sp2	Gansu Fisheries Research Institute	GS0566	China	Gansu	Longnan	Liangdang	N 33°55.939'	E 106°25.613'	H 1891m	MT271402
Triplophysa sp2-003	Triplophysa sp2	Gansu Fisheries Research Institute	GS0567	China	Gansu	Longnan	Liangdang	N 33°55.939'	E 106°25.613'	H 1891m	MT271402
Triplophysa sp2-004	Triplophysa sp2	Gansu Fisheries Research Institute	GS0568	China	Gansu	Longnan	Liangdang	N 33°55.940'	E 106°25.614'	H 1908m	MT271402
Triplophysa sp2-025	Triplophysa sp2	Gansu Fisheries Research Institute	GS0589	China	Gansu	Longnan	Liangdang	N 33°55.940'	E 106°25.614'	H 1908m	MT271402
Triplophysa sp2-026	Triplophysa sp2	Gansu Fisheries Research Institute	GS0590	China	Gansu	Longnan	Liangdang	N 33°55.940'	E 106°25.614'	H 1908m	MT271402
Triplophysa sp2-027	Triplophysa sp2	Gansu Fisheries Research Institute	GS0591	China	Gansu	Longnan	Liangdang	N 33°55.940'	E 106°25.614'	H 1908m	MT271402
Triplophysa sp2-005	Triplophysa sp2	Gansu Fisheries Research Institute	GS0569	China	Gansu	Tianshui	Maiji	N 34°16.897'	E 106° 8.897'	H 1929m	MT271402
Triplophysa sp2-006	Triplophysa sp2	Gansu Fisheries Research Institute	GS0570	China	Gansu	Tianshui	Maiji	N 34°16.897'	E 106° 8.897'	H 1929m	MT271402
Triplophysa sp2-007	Triplophysa sp2	Gansu Fisheries Research Institute	GS0571	China	Gansu	Tianshui	Maiji	N 34°16.897'	E 106° 8.897'	H 1929m	MT271402
Triplophysa sp2-008	Triplophysa sp2	Gansu Fisheries Research Institute	GS0572	China	Gansu	Tianshui	Maiji	N 34°16.897'	E 106° 8.897'	H 1929m	MT271402
Triplophysa sp2-009	Triplophysa sp2	Gansu Fisheries Research Institute	GS0573	China	Gansu	Tianshui	Maiji	N 34°16.897'	E 106° 8.897'	H 1929m	MT271402
Triplophysa sp2-010	Triplophysa sp2	Gansu Fisheries Research Institute	GS0574	China	Gansu	Tianshui	Maiji	N 34°16.897'	E 106° 8.897'	H 1929m	MT271402
Triplophysa sp2-011	Triplophysa sp2	Gansu Fisheries Research Institute	GS0575	China	Gansu	Tianshui	Maiji	N 34°16.897'	E 106° 8.897'	H 1929m	MT271402
Triplophysa sp2-012	Triplophysa sp2	Gansu Fisheries Research Institute	GS0576	China	Gansu	Tianshui	Maiji	N 34°16.897'	E 106° 8.897'	H 1929m	MT271402
Triplophysa sp2-013	Triplophysa sp2	Gansu Fisheries Research Institute	GS0577	China	Gansu	Tianshui	Maiji	N 34°16.897'	E 106° 8.897'	H 1929m	MT271402
Triplophysa sp2-014	Triplophysa sp2	Gansu Fisheries Research Institute	GS0578	China	Gansu	Tianshui	Maiji	N 34°16.897'	E 106° 8.897'	H 1929m	MT271402
Triplophysa sp2-015	Triplophysa sp2	Gansu Fisheries Research Institute	GS0579	China	Gansu	Tianshui	Maiji	N 34°16.897'	E 106° 8.897'	H 1929m	MT271402
Triplophysa sp2-016	Triplophysa sp2	Gansu Fisheries Research Institute	GS0580	China	Gansu	Tianshui	Maiji	N 34°16.897'	E 106° 8.897'	H 1929m	MT271402
Triplophysa sp2-017	Triplophysa sp2	Gansu Fisheries Research Institute	GS0581	China	Gansu	Tianshui	Maiji	N 34°16.897'	E 106° 8.897'	H 1929m	MT271402
Triplophysa sp2-018	Triplophysa sp2	Gansu Fisheries Research Institute	GS0582	China	Gansu	Tianshui	Maiji	N 34°16.897'	E 106° 8.897'	H 1929m	MT271402
Triplophysa sp2-019	Triplophysa sp2	Gansu Fisheries Research Institute	GS0583	China	Gansu	Tianshui	Maiji	N 34°16.897'	E 106° 8.897'	H 1929m	MT271402
Triplophysa sp2-020	Triplophysa sp2	Gansu Fisheries Research Institute	GS0584	China	Gansu	Tianshui	Maiji	N 34°16.897'	E 106° 8.897'	H 1929m	MT271402
Triplophysa sp2-021	Triplophysa sp2	Gansu Fisheries Research Institute	GS0585	China	Gansu	Tianshui	Maiji	N 34°16.897'	E 106° 8.897'	H 1929m	MT271402
Triplophysa sp2-022	Triplophysa sp2	Gansu Fisheries Research Institute	GS0586	China	Gansu	Tianshui	Maiji	N 34°16.897'	E 106° 8.897'	H 1929m	MT271402
Triplophysa sp2-023	Triplophysa sp2	Gansu Fisheries Research Institute	GS0587	China	Gansu	Tianshui	Maiji	N 34°16.897'	E 106° 8.897'	H 1929m	MT271402
Triplophysa sp2-024	Triplophysa sp2	Gansu Fisheries Research Institute	GS0588	China	Gansu	Tianshui	Maiji	N 34°16.897'	E 106° 8.897'	H 1929m	MT271402
Triplophysa sp2-035	Triplophysa sp2	Gansu Fisheries Research Institute	GS0599	China	Gansu	Tianshui	Qinzhou	N 34°13.369'	E 105°57.765'	H 1417m	MT271402
Triplophysa sp2-036	Triplophysa sp2	Gansu Fisheries Research Institute	GS0600	China	Gansu	Tianshui	Qinzhou	N 34°13.369'	E 105°57.765'	H 1417m	MT271402
Triplophysa sp2-037	Triplophysa sp2	Gansu Fisheries Research Institute	GS0601	China	Gansu	Tianshui	Qinzhou	N 34°13.369'	E 105°57.765'	H 1417m	MT271402
Triplophysa sp2-038	Triplophysa sp2	Gansu Fisheries Research Institute	GS0602	China	Gansu	Tianshui	Qinzhou	N 34°13.369'	E 105°57.765'	H 1417m	MT271402
Triplophysa sp2-039	Triplophysa sp2	Gansu Fisheries Research Institute	GS0603	China	Gansu	Tianshui	Qinzhou	N 34°13.369'	E 105°57.765'	H 1417m	MT271402
Triplophysa sp2-040	Triplophysa sp2	Gansu Fisheries Research Institute	GS0604	China	Gansu	Tianshui	Qinzhou	N 34°13.369'	E 105°57.765'	H 1417m	MT271402
Triplophysa sp2-041	Triplophysa sp2	Gansu Fisheries Research Institute	GS0605	China	Gansu	Tianshui	Qinzhou	N 34°13.369'	E 105°57.765'	H 1417m	MT271402
Triplophysa sp2-042	Triplophysa sp2	Gansu Fisheries Research Institute	GS0606	China	Gansu	Tianshui	Qinzhou	N 34°13.369'	E 105°57.765'	H 1417m	MT271402
Triplophysa sp2-043	Triplophysa sp2	Gansu Fisheries Research Institute	GS0607	China	Gansu	Tianshui	Qinzhou	N 34°13.369'	E 105°57.765'	H 1417m	MT271402
Triplophysa sp2-044	Triplophysa sp2	Gansu Fisheries Research Institute	GS0608	China	Gansu	Tianshui	Qinzhou	N 34°13.369'	E 105°57.765'	H 1417m	MT271402
Triplophysa sp2-045	Triplophysa sp2	Gansu Fisheries Research Institute	GS0609	China	Gansu	Tianshui	Qinzhou	N 34°13.369'	E 105°57.765'	H 1417m	MT271402
Triplophysa sp2-046	Triplophysa sp2	Gansu Fisheries Research Institute	GS0610	China	Gansu	Tianshui	Qinzhou	N 34°13.369'	E 105°57.765'	H 1417m	MT271402
Triplophysa sp2-047	Triplophysa sp2	Gansu Fisheries Research Institute	GS0611	China	Gansu	Tianshui	Qinzhou	N 34°13.369'	E 105°57.765'	H 1417m	MT271402
Triplophysa sp2-048	Triplophysa sp2	Gansu Fisheries Research Institute	GS0612	China	Gansu	Tianshui	Qinzhou	N 34°13.369'	E 105°57.765'	H 1417m	MT271402
Triplophysa sp2-049	Triplophysa sp2	Gansu Fisheries Research Institute	GS0613	China	Gansu	Tianshui	Qinzhou	N 34°13.369'	E 105°57.765'	H 1417m	MT271402
Triplophysa sp2-050	Triplophysa sp2	Gansu Fisheries Research Institute	GS0614	China	Gansu	Tianshui	Qinzhou	N 34°13.369'	E 105°57.765'	H 1417m	MT271402
Triplophysa sp2-051	Triplophysa sp2	Gansu Fisheries Research Institute	GS0615	China	Gansu	Tianshui	Qinzhou	N 34°13.369'	E 105°57.765'	H 1417m	MT271402
Triplophysa sp2-052	Triplophysa sp2	Gansu Fisheries Research Institute	GS0616	China	Gansu	Tianshui	Qinzhou	N 34°13.369'	E 105°57.765'	H 1417m	MT271402
Triplophysa sp2-053	Triplophysa sp2	Gansu Fisheries Research Institute	GS0617	China	Gansu	Tianshui	Qinzhou	N 34°13.369'	E 105°57.765'	H 1417m	MT271402
Triplophysa sp2-054	Triplophysa sp2	Gansu Fisheries Research Institute	GS0618	China	Gansu	Tianshui	Qinzhou	N 34°13.369'	E 105°57.765'	H 1417m	MT271402
Triplophysa sp2-055	Triplophysa sp2	Gansu Fisheries Research Institute	GS0619	China	Gansu	Tianshui	Qinzhou	N 34°13.369'	E 105°57.765'	H 1417m	MT271402
Triplophysa sp2-056	Triplophysa sp2	Gansu Fisheries Research Institute	GS0620	China	Gansu	Tianshui	Qinzhou	N 34°13.369'	E 105°57.765'	H 1417m	MT271402
Triplophysa sp2-057	Triplophysa sp2	Gansu Fisheries Research Institute	GS0621	China	Gansu	Tianshui	Qinzhou	N 34°13.369'	E 105°57.765'	H 1417m	MT271402
Triplophysa sp2-058	Triplophysa sp2	Gansu Fisheries Research Institute	GS0622	China	Gansu	Tianshui	Qinzhou	N 34°13.369'	E 105°57.765'	H 1417m	MT271402
Triplophysa sp2-059	Triplophysa sp2	Gansu Fisheries Research Institute	GS0623	China	Gansu	Tianshui	Qinzhou	N 34°13.369'	E 105°57.765'	H 1417m	MT271402
Triplophysa sp2-060	Triplophysa sp2	Gansu Fisheries Research Institute	GS0624	China	Gansu	Tianshui	Qinzhou	N 34°13.369'	E 105°57.765'	H 1417m	MT271402
Triplophysa sp2-061	Triplophysa sp2	Gansu Fisheries Research Institute	GS0625	China	Gansu	Tianshui	Qinzhou	N 34°13.369'	E 105°57.765'	H 1417m	MT271402
Triplophysa sp2-062	Triplophysa sp2	Gansu Fisheries Research Institute	GS0626	China	Gansu	Tianshui	Qinzhou	N 34°13.369'	E 105°57.765'	H 1417m	MT271402
Triplophysa sp2-063	Triplophysa sp2	Gansu Fisheries Research Institute	GS0627	China	Gansu	Tianshui	Qinzhou	N 34°13.369'	E 105°57.765'	H 1417m	MT271402
Triplophysa sp2-064	Triplophysa sp2	Gansu Fisheries Research Institute	GS0628	China	Gansu	Tianshui	Qinzhou	N 34°13.369'	E 105°57.765'	H 1417m	MT271402
Triplophysa sp2-066	Triplophysa sp2	Gansu Fisheries Research Institute	GS0630	China	Gansu	Tianshui	Qinzhou	N 34°13.369'	E 105°57.765'	H 1417m	MT271402
Triplophysa sp2-067	Triplophysa sp2	Gansu Fisheries Research Institute	GS0631	China	Gansu	Tianshui	Qinzhou	N 34°13.369'	E 105°57.765'	H 1417m	MT271402
Triplophysa sp2-028	Triplophysa sp2	Gansu Fisheries Research Institute	GS0592	China	Gansu	Tianshui	Qinzhou	N 34°15.523'	E 105°54.067'	H 2018m	MT271402
Triplophysa sp2-029	Triplophysa sp2	Gansu Fisheries Research Institute	GS0593	China	Gansu	Tianshui	Qinzhou	N 34°15.523'	E 105°54.067'	H 2018m	MT271423
Triplophysa sp2-030	Triplophysa sp2	Gansu Fisheries Research Institute	GS0594	China	Gansu	Tianshui	Qinzhou	N 34°15.523'	E 105°54.067'	H 2018m	MT271424
Triplophysa sp2-031	Triplophysa sp2	Gansu Fisheries Research Institute	GS0595	China	Gansu	Tianshui	Qinzhou	N 34°15.523'	E 105°54.067'	H 2018m	MT271402
Triplophysa sp2-032	Triplophysa sp2	Gansu Fisheries Research Institute	GS0596	China	Gansu	Tianshui	Qinzhou	N 34°15.523'	E 105°54.067'	H 2018m	MT271410
Triplophysa stoliczkai-041	Triplophysa stoliczkai	Gansu Fisheries Research Institute	G0056	China	Gansu	Pingliang	Chongxin	N 35°10.769'	E 107°02.760'	H 1181m	MT271542
Triplophysa stoliczkai-085	Triplophysa stoliczkai	Gansu Fisheries Research Institute	G0057	China	Gansu	Tianshui	Gangu	N 34°45.585'	E 105°10.807'	H 1324m	MT271542
Triplophysa stoliczkai-086	Triplophysa stoliczkai	Gansu Fisheries Research Institute	G0058	China	Gansu	Tianshui	Gangu	N 34°45.585'	E 105°10.807'	H 1324m	MT271542
Triplophysa stoliczkai-010	Triplophysa stoliczkai	Gansu Fisheries Research Institute	G0059	China	Gansu	Wuwei	Gulang	N 37°22.566'	E 102°55.645'	H 2273m	MT271542
Triplophysa stoliczkai-011	Triplophysa stoliczkai	Gansu Fisheries Research Institute	G0060	China	Gansu	Wuwei	Gulang	N 37°22.566'	E 102°55.645'	H 2273m	MT271542
Triplophysa stoliczkai-012	Triplophysa stoliczkai	Gansu Fisheries Research Institute	G0061	China	Gansu	Wuwei	Gulang	N 37°22.566'	E 102°55.645'	H 2273m	MT271545
Triplophysa stoliczkai-030	Triplophysa stoliczkai	Gansu Fisheries Research Institute	G0062	China	Gansu	Wuwei	Gulang	N 37°22.566'	E 102°55.645'	H 2273m	MT271545
Triplophysa stoliczkai-031	Triplophysa stoliczkai	Gansu Fisheries Research Institute	G0063	China	Gansu	Wuwei	Gulang	N 37°22.566'	E 102°55.645'	H 2273m	MT271542
Triplophysa stoliczkai-076	Triplophysa stoliczkai	Gansu Fisheries Research Institute	G0064	China	Gansu	Wuwei	Gulang	N 37°22.566'	E 102°55.645'	H 2273m	MT271542
Triplophysa stoliczkai-077	Triplophysa stoliczkai	Gansu Fisheries Research Institute	G0065	China	Gansu	Wuwei	Gulang	N 37°22.566'	E 102°55.645'	H 2273m	MT271546
Triplophysa stoliczkai-078	Triplophysa stoliczkai	Gansu Fisheries Research Institute	G0066	China	Gansu	Wuwei	Gulang	N 37°22.566'	E 102°55.645'	H 2273m	MT271543
Triplophysa stoliczkai-079	Triplophysa stoliczkai	Gansu Fisheries Research Institute	G0067	China	Gansu	Wuwei	Gulang	N 37°22.566'	E 102°55.645'	H 2273m	MT271543
Triplophysa stoliczkai-120	Triplophysa stoliczkai	Gansu Fisheries Research Institute	G0068	China	Gansu	Wuwei	Gulang	N 37°22.566'	E 102°55.645'	H 2273m	MT271543
Triplophysa stoliczkai-018	Triplophysa stoliczkai	Gansu Fisheries Research Institute	G0069	China	Gansu	Gannan	Hezuo	N 34°40.451'	E 103°00.445'	H 2808m	MT271543
Triplophysa stoliczkai-019	Triplophysa stoliczkai	Gansu Fisheries Research Institute	G0070	China	Gansu	Gannan	Hezuo	N 34°40.451'	E 103°00.445'	H 2808m	MT271565
Triplophysa stoliczkai-020	Triplophysa stoliczkai	Gansu Fisheries Research Institute	G0071	China	Gansu	Gannan	Hezuo	N 34°40.451'	E 103°00.445'	H 2808m	MT271543
Triplophysa stoliczkai-021	Triplophysa stoliczkai	Gansu Fisheries Research Institute	G0072	China	Gansu	Gannan	Hezuo	N 34°40.451'	E 103°00.445'	H 2808m	MT271564
Triplophysa stoliczkai-022	Triplophysa stoliczkai	Gansu Fisheries Research Institute	G0073	China	Gansu	Gannan	Hezuo	N 34°40.451'	E 103°00.445'	H 2808m	MT271564
Triplophysa stoliczkai-023	Triplophysa stoliczkai	Gansu Fisheries Research Institute	G0074	China	Gansu	Gannan	Hezuo	N 34°40.451'	E 103°00.445'	H 2808m	MT271564
Triplophysa stoliczkai-024	Triplophysa stoliczkai	Gansu Fisheries Research Institute	G0075	China	Gansu	Gannan	Hezuo	N 34°40.451'	E 103°00.445'	H 2808m	MT271547
Triplophysa stoliczkai-025	Triplophysa stoliczkai	Gansu Fisheries Research Institute	G0076	China	Gansu	Gannan	Hezuo	N 34°40.451'	E 103°00.445'	H 2808m	MT271561
Triplophysa stoliczkai-026	Triplophysa stoliczkai	Gansu Fisheries Research Institute	G0077	China	Gansu	Gannan	Hezuo	N 34°40.451'	E 103°00.445'	H 2808m	MT271562
Triplophysa stoliczkai-027	Triplophysa stoliczkai	Gansu Fisheries Research Institute	G0078	China	Gansu	Gannan	Hezuo	N 34°40.451'	E 103°00.445'	H 2808m	MT271563
Triplophysa stoliczkai-102	Triplophysa stoliczkai	Gansu Fisheries Research Institute	G0079	China	Gansu	Gannan	Hezuo	N 34°40.451'	E 103°00.445'	H 2808m	MT271559
Triplophysa stoliczkai-103	Triplophysa stoliczkai	Gansu Fisheries Research Institute	G0080	China	Gansu	Gannan	Hezuo	N 34°40.451'	E 103°00.445'	H 2808m	MT271563
Triplophysa stoliczkai-104	Triplophysa stoliczkai	Gansu Fisheries Research Institute	G0081	China	Gansu	Gannan	Hezuo	N 34°40.451'	E 103°00.445'	H 2808m	MT271545
Triplophysa stoliczkai-105	Triplophysa stoliczkai	Gansu Fisheries Research Institute	G0082	China	Gansu	Gannan	Hezuo	N 34°40.451'	E 103°00.445'	H 2808m	MT271545
Triplophysa stoliczkai-106	Triplophysa stoliczkai	Gansu Fisheries Research Institute	G0083	China	Gansu	Gannan	Hezuo	N 34°40.451'	E 103°00.445'	H 2808m	MT271566
Triplophysa stoliczkai-113	Triplophysa stoliczkai	Gansu Fisheries Research Institute	G0084	China	Gansu	Gannan	Hezuo	N 34°40.451'	E 103°00.445'	H 2808m	MT271548
Triplophysa stoliczkai-114	Triplophysa stoliczkai	Gansu Fisheries Research Institute	G0085	China	Gansu	Gannan	Hezuo	N 34°40.451'	E 103°00.445'	H 2808m	MT271560
Triplophysa stoliczkai-089	Triplophysa stoliczkai	Gansu Fisheries Research Institute	G0086	China	Gansu	Lanzhou	Honggu	N 36°22.596'	E 102°51.085'	H 2102m	MT271545
Triplophysa stoliczkai-090	Triplophysa stoliczkai	Gansu Fisheries Research Institute	G0087	China	Gansu	Lanzhou	Honggu	N 36°22.596'	E 102°51.085'	H 2102m	MT271545
Triplophysa stoliczkai-091	Triplophysa stoliczkai	Gansu Fisheries Research Institute	G0088	China	Gansu	Lanzhou	Honggu	N 36°22.596'	E 102°51.085'	H 2102m	MT271545
Triplophysa stoliczkai-092	Triplophysa stoliczkai	Gansu Fisheries Research Institute	G0089	China	Gansu	Lanzhou	Honggu	N 36°22.596'	E 102°51.085'	H 2102m	MT271545
Triplophysa stoliczkai-093	Triplophysa stoliczkai	Gansu Fisheries Research Institute	G0090	China	Gansu	Lanzhou	Honggu	N 36°22.596'	E 102°51.085'	H 2102m	MT271545
Triplophysa stoliczkai-094	Triplophysa stoliczkai	Gansu Fisheries Research Institute	G0091	China	Gansu	Lanzhou	Honggu	N 36°22.596'	E 102°51.085'	H 2102m	MT271545
Triplophysa stoliczkai-095	Triplophysa stoliczkai	Gansu Fisheries Research Institute	G0092	China	Gansu	Lanzhou	Honggu	N 36°22.596'	E 102°51.085'	H 2102m	MT271545
Triplophysa stoliczkai-096	Triplophysa stoliczkai	Gansu Fisheries Research Institute	G0093	China	Gansu	Lanzhou	Honggu	N 36°22.596'	E 102°51.085'	H 2102m	MT271543
Triplophysa stoliczkai-097	Triplophysa stoliczkai	Gansu Fisheries Research Institute	G0094	China	Gansu	Lanzhou	Honggu	N 36°22.596'	E 102°51.085'	H 2102m	MT271545
Triplophysa stoliczkai-098	Triplophysa stoliczkai	Gansu Fisheries Research Institute	G0095	China	Gansu	Lanzhou	Honggu	N 36°22.596'	E 102°51.085'	H 2102m	MT271545
Triplophysa stoliczkai-099	Triplophysa stoliczkai	Gansu Fisheries Research Institute	G0096	China	Gansu	Lanzhou	Honggu	N 36°22.596'	E 102°51.085'	H 2102m	MT271545
Triplophysa stoliczkai-100	Triplophysa stoliczkai	Gansu Fisheries Research Institute	G0097	China	Gansu	Lanzhou	Honggu	N 36°22.596'	E 102°51.085'	H 2102m	MT271545
Triplophysa stoliczkai-042	Triplophysa stoliczkai	Gansu Fisheries Research Institute	G0098	China	Gansu	Pingliang	Huating	N 35°18.599'	E 106°36.832'	H 1535m	MT271545
Triplophysa stoliczkai-043	Triplophysa stoliczkai	Gansu Fisheries Research Institute	G0099	China	Gansu	Pingliang	Huating	N 35°18.599'	E 106°36.832'	H 1535m	MT271545
Triplophysa stoliczkai-046	Triplophysa stoliczkai	Gansu Fisheries Research Institute	G0100	China	Gansu	Pingliang	Huating	N 35°18.599'	E 106°36.832'	H 1535m	MT271545
Triplophysa stoliczkai-047	Triplophysa stoliczkai	Gansu Fisheries Research Institute	G0101	China	Gansu	Pingliang	Huating	N 35°18.599'	E 106°36.832'	H 1535m	MT271545
Triplophysa stoliczkai-044	Triplophysa stoliczkai	Gansu Fisheries Research Institute	G0102	China	Gansu	Pingliang	Kongtong	N 35°38.904'	E 106°30.453'	H 1553m	MT271545
Triplophysa stoliczkai-045	Triplophysa stoliczkai	Gansu Fisheries Research Institute	G0103	China	Gansu	Pingliang	Kongtong	N 35°38.904'	E 106°30.453'	H 1553m	MT271545
Triplophysa stoliczkai-062	Triplophysa stoliczkai	Gansu Fisheries Research Institute	G0104	China	Gansu	Pingliang	Kongtong	N 35°38.904'	E 106°30.453'	H 1553m	MT271545
Triplophysa stoliczkai-063	Triplophysa stoliczkai	Gansu Fisheries Research Institute	G0105	China	Gansu	Pingliang	Kongtong	N 35°38.904'	E 106°30.453'	H 1553m	MT271545
Triplophysa stoliczkai-064	Triplophysa stoliczkai	Gansu Fisheries Research Institute	G0106	China	Gansu	Pingliang	Kongtong	N 35°38.904'	E 106°30.453'	H 1553m	MT271545
Triplophysa stoliczkai-065	Triplophysa stoliczkai	Gansu Fisheries Research Institute	G0107	China	Gansu	Pingliang	Kongtong	N 35°38.904'	E 106°30.453'	H 1553m	MT271545
Triplophysa stoliczkai-066	Triplophysa stoliczkai	Gansu Fisheries Research Institute	G0108	China	Gansu	Pingliang	Kongtong	N 35°38.904'	E 106°30.453'	H 1553m	MT271545
Triplophysa stoliczkai-067	Triplophysa stoliczkai	Gansu Fisheries Research Institute	G0109	China	Gansu	Pingliang	Kongtong	N 35°38.904'	E 106°30.453'	H 1553m	MT271545
Triplophysa stoliczkai-068	Triplophysa stoliczkai	Gansu Fisheries Research Institute	G0110	China	Gansu	Pingliang	Kongtong	N 35°38.904'	E 106°30.453'	H 1553m	MT271545
Triplophysa stoliczkai-069	Triplophysa stoliczkai	Gansu Fisheries Research Institute	G0111	China	Gansu	Pingliang	Kongtong	N 35°38.904'	E 106°30.453'	H 1553m	MT271549
Triplophysa stoliczkai-070	Triplophysa stoliczkai	Gansu Fisheries Research Institute	G0112	China	Gansu	Pingliang	Kongtong	N 35°38.904'	E 106°30.453'	H 1553m	MT271545
Triplophysa stoliczkai-071	Triplophysa stoliczkai	Gansu Fisheries Research Institute	G0113	China	Gansu	Pingliang	Kongtong	N 35°38.904'	E 106°30.453'	H 1553m	MT271545
Triplophysa stoliczkai-072	Triplophysa stoliczkai	Gansu Fisheries Research Institute	G0114	China	Gansu	Pingliang	Kongtong	N 35°38.904'	E 106°30.453'	H 1553m	MT271545
Triplophysa stoliczkai-073	Triplophysa stoliczkai	Gansu Fisheries Research Institute	G0115	China	Gansu	Pingliang	Kongtong	N 35°38.904'	E 106°30.453'	H 1553m	MT271545
Triplophysa stoliczkai-074	Triplophysa stoliczkai	Gansu Fisheries Research Institute	G0116	China	Gansu	Pingliang	Kongtong	N 35°38.904'	E 106°30.453'	H 1553m	MT271545
Triplophysa stoliczkai-075	Triplophysa stoliczkai	Gansu Fisheries Research Institute	G0117	China	Gansu	Pingliang	Kongtong	N 35°38.904'	E 106°30.453'	H 1553m	MT271550
Triplophysa stoliczkai-118	Triplophysa stoliczkai	Gansu Fisheries Research Institute	G0118	China	Gansu	Pingliang	Kongtong	N 35°38.904'	E 106°30.453'	H 1553m	MT271550
Triplophysa stoliczkai-040	Triplophysa stoliczkai	Gansu Fisheries Research Institute	G0119	China	Gansu	Linxia	Linxia	N 35°28.278'	E 103° 2.238'	H 2076m	MT271550
Triplophysa stoliczkai-101	Triplophysa stoliczkai	Gansu Fisheries Research Institute	G0120	China	Gansu	Linxia	Linxia	N 35°28.278'	E 103° 2.238'	H 2076m	MT271550
Triplophysa stoliczkai-110	Triplophysa stoliczkai	Gansu Fisheries Research Institute	G0121	China	Gansu	Linxia	Linxia	N 35°28.278'	E 103° 2.238'	H 2076m	MT271545
Triplophysa stoliczkai-111	Triplophysa stoliczkai	Gansu Fisheries Research Institute	G0122	China	Gansu	Linxia	Linxia	N 35°28.278'	E 103° 2.238'	H 2076m	MT271545
Triplophysa stoliczkai-028	Triplophysa stoliczkai	Gansu Fisheries Research Institute	G0123	China	Gansu	Gannan	Luqu	N 34°10.885'	E 102°12.026'	H 3556m	MT271545
Triplophysa stoliczkai-029	Triplophysa stoliczkai	Gansu Fisheries Research Institute	G0124	China	Gansu	Gannan	Luqu	N 34°10.885'	E 102°12.026'	H 3556m	MT271545
Triplophysa stoliczkai-032	Triplophysa stoliczkai	Gansu Fisheries Research Institute	G0125	China	Gansu	Gannan	Luqu	N 34°37.107'	E 103°11.066'	H 2718m	MT271545
Triplophysa stoliczkai-033	Triplophysa stoliczkai	Gansu Fisheries Research Institute	G0126	China	Gansu	Gannan	Luqu	N 34°37.107'	E 103°11.066'	H 2718m	MT271545
Triplophysa stoliczkai-036	Triplophysa stoliczkai	Gansu Fisheries Research Institute	G0127	China	Gansu	Dingxi	Minxian	N 34°24.162'	E 104°04.066'	H 2345m	MT271545
Triplophysa stoliczkai-037	Triplophysa stoliczkai	Gansu Fisheries Research Institute	G0128	China	Gansu	Dingxi	Minxian	N 34°24.162'	E 104°04.066'	H 2345m	MT271545
Triplophysa stoliczkai-108	Triplophysa stoliczkai	Gansu Fisheries Research Institute	G0129	China	Gansu	Dingxi	Minxian	N 34°24.162'	E 104°04.066'	H 2345m	MT271545
Triplophysa stoliczkai-109	Triplophysa stoliczkai	Gansu Fisheries Research Institute	G0130	China	Gansu	Dingxi	Minxian	N 34°24.162'	E 104°04.066'	H 2345m	MT271545
Triplophysa stoliczkai-115	Triplophysa stoliczkai	Gansu Fisheries Research Institute	G0131	China	Gansu	Dingxi	Minxian	N 34°29.638'	E 104°04.958'	H 2288m	MT271545
Triplophysa stoliczkai-116	Triplophysa stoliczkai	Gansu Fisheries Research Institute	G0132	China	Gansu	Dingxi	Minxian	N 34°29.638'	E 104°04.958'	H 2288m	MT271545
Triplophysa stoliczkai-054	Triplophysa stoliczkai	Gansu Fisheries Research Institute	G0133	China	Gansu	Tianshui	Qingshui	N 34°47.26'	E 104°11.629'	H 1430m	MT271545
Triplophysa stoliczkai-055	Triplophysa stoliczkai	Gansu Fisheries Research Institute	G0134	China	Gansu	Tianshui	Qingshui	N 34°47.26'	E 104°11.629'	H 1430m	MT271545
Triplophysa stoliczkai-056	Triplophysa stoliczkai	Gansu Fisheries Research Institute	G0135	China	Gansu	Tianshui	Qingshui	N 34°47.26'	E 104°11.629'	H 1430m	MT271544
Triplophysa stoliczkai-057	Triplophysa stoliczkai	Gansu Fisheries Research Institute	G0136	China	Gansu	Tianshui	Qingshui	N 34°47.26'	E 104°11.629'	H 1430m	MT271544
Triplophysa stoliczkai-058	Triplophysa stoliczkai	Gansu Fisheries Research Institute	G0137	China	Gansu	Tianshui	Qingshui	N 34°47.26'	E 104°11.629'	H 1430m	MT271544
Triplophysa stoliczkai-059	Triplophysa stoliczkai	Gansu Fisheries Research Institute	G0138	China	Gansu	Tianshui	Qingshui	N 34°47.26'	E 104°11.629'	H 1430m	MT271545
Triplophysa stoliczkai-060	Triplophysa stoliczkai	Gansu Fisheries Research Institute	G0139	China	Gansu	Tianshui	Qingshui	N 34°47.26'	E 104°11.629'	H 1430m	MT271544
Triplophysa stoliczkai-061	Triplophysa stoliczkai	Gansu Fisheries Research Institute	G0140	China	Gansu	Tianshui	Qingshui	N 34°47.26'	E 104°11.629'	H 1430m	MT271545
Triplophysa stoliczkai-126	Triplophysa stoliczkai	Gansu Fisheries Research Institute	G0141	China	Gansu	Tianshui	Qinzhou	N 34°13.242'	E 105°35.138'	H 1590m	MT271550
Triplophysa stoliczkai-127	Triplophysa stoliczkai	Gansu Fisheries Research Institute	G0142	China	Gansu	Tianshui	Qinzhou	N 34°13.242'	E 105°35.138'	H 1590m	MT271550
Triplophysa stoliczkai-125	Triplophysa stoliczkai	Gansu Fisheries Research Institute	G0143	China	Gansu	Tianshui	Qinzhou	N 34°22.030'	E 105°30.332'	H 1583m	MT271550
Triplophysa stoliczkai-128	Triplophysa stoliczkai	Gansu Fisheries Research Institute	G0144	China	Gansu	Tianshui	Qinzhou	N 34°22.030'	E 105°30.332'	H 1583m	MT271544
Triplophysa stoliczkai-001	Triplophysa stoliczkai	Gansu Fisheries Research Institute	G0145	China	Gansu	Longnan	Tanchang	N 33°57.647'	E 104°25.316'	H 2052m	MT271551
Triplophysa stoliczkai-007	Triplophysa stoliczkai	Gansu Fisheries Research Institute	G0146	China	Gansu	Longnan	Tanchang	N 33°57.647'	E 104°25.316'	H 2052m	MT271544
Triplophysa stoliczkai-084	Triplophysa stoliczkai	Gansu Fisheries Research Institute	G0147	China	Gansu	Dingxi	Weiyuan	N 35°00.890'	E 104°12.790'	H 2231m	MT271544
Triplophysa stoliczkai-129	Triplophysa stoliczkai	Gansu Fisheries Research Institute	G0148	China	Gansu	Dingxi	Weiyuan	N 35°00.890'	E 104°12.790'	H 2231m	MT271552
Triplophysa stoliczkai-034	Triplophysa stoliczkai	Gansu Fisheries Research Institute	G0149	China	Gansu	Gannan	Xiahe	N 34°51.126'	E 102° 7.922'	H 3490m	MT271553
Triplophysa stoliczkai-035	Triplophysa stoliczkai	Gansu Fisheries Research Institute	G0150	China	Gansu	Gannan	Xiahe	N 34°51.126'	E 102° 7.922'	H 3490m	MT271544
Triplophysa stoliczkai-080	Triplophysa stoliczkai	Gansu Fisheries Research Institute	G0151	China	Gansu	Gannan	Xiahe	N 35°21.832'	E 102°52.734'	H 2304m	MT271544
Triplophysa stoliczkai-107	Triplophysa stoliczkai	Gansu Fisheries Research Institute	G0152	China	Gansu	Gannan	Xiahe	N 35°21.832'	E 102°52.734'	H 2304m	MT271544
Triplophysa stoliczkai-112	Triplophysa stoliczkai	Gansu Fisheries Research Institute	G0153	China	Gansu	Gannan	Xiahe	N 35°21.832'	E 102°52.734'	H 2304m	MT271554
Triplophysa stoliczkai-121	Triplophysa stoliczkai	Gansu Fisheries Research Institute	G0154	China	Gansu	Gannan	Xiahe	N 35°21.832'	E 102°52.734'	H 2304m	MT271554
Triplophysa stoliczkai-122	Triplophysa stoliczkai	Gansu Fisheries Research Institute	G0155	China	Qinghai	Haibei	Tianjun	N 37°10.532'	E 99°20.424'	H 3295m	MT271554
Triplophysa stoliczkai-123	Triplophysa stoliczkai	Gansu Fisheries Research Institute	G0156	China	Qinghai	Haibei	Tianjun	N 37°10.532'	E 99°20.424'	H 3295m	MT271544
Triplophysa stoliczkai-124	Triplophysa stoliczkai	Gansu Fisheries Research Institute	G0157	China	Qinghai	Haibei	Gangcha	N 37°21.835'	E 100°6.597'	H 3323m	MT271554
Triplophysa stoliczkai-048	Triplophysa stoliczkai	Gansu Fisheries Research Institute	G0158	China	Gansu	Qingyang	Xifeng	N 35°25.872'	E 107°40.397'	H 990m	MT271554
Triplophysa stoliczkai-049	Triplophysa stoliczkai	Gansu Fisheries Research Institute	G0159	China	Gansu	Qingyang	Xifeng	N 35°25.872'	E 107°40.397'	H 990m	MT271554
Triplophysa stoliczkai-050	Triplophysa stoliczkai	Gansu Fisheries Research Institute	G0160	China	Gansu	Qingyang	Xifeng	N 35°25.872'	E 107°40.397'	H 990m	MT271544
Triplophysa stoliczkai-051	Triplophysa stoliczkai	Gansu Fisheries Research Institute	G0161	China	Gansu	Qingyang	Xifeng	N 35°25.872'	E 107°40.397'	H 990m	MT271544
Triplophysa stoliczkai-052	Triplophysa stoliczkai	Gansu Fisheries Research Institute	G0162	China	Gansu	Qingyang	Xifeng	N 35°25.872'	E 107°40.397'	H 990m	MT271544
Triplophysa stoliczkai-008	Triplophysa stoliczkai	Gansu Fisheries Research Institute	G0163	China	Gansu	Lanzhou	Yongchang	N 36°18.697'	E 103°25.040'	H 2066m	MT271544
Triplophysa stoliczkai-009	Triplophysa stoliczkai	Gansu Fisheries Research Institute	G0164	China	Gansu	Lanzhou	Yongchang	N 36°18.697'	E 103°25.040'	H 2066m	MT271554
Triplophysa stoliczkai-014	Triplophysa stoliczkai	Gansu Fisheries Research Institute	G0165	China	Gansu	Lanzhou	Yongchang	N 36°18.697'	E 103°25.040'	H 2066m	MT271554
Triplophysa stoliczkai-015	Triplophysa stoliczkai	Gansu Fisheries Research Institute	G0166	China	Gansu	Lanzhou	Yongchang	N 36°18.697'	E 103°25.040'	H 2066m	MT271554
Triplophysa stoliczkai-016	Triplophysa stoliczkai	Gansu Fisheries Research Institute	G0167	China	Gansu	Lanzhou	Yongchang	N 36°18.697'	E 103°25.040'	H 2066m	MT271555
Triplophysa stoliczkai-038	Triplophysa stoliczkai	Gansu Fisheries Research Institute	G0168	China	Gansu	Lanzhou	Yongchang	N 36°18.697'	E 103°25.040'	H 2066m	MT271556
Triplophysa stoliczkai-039	Triplophysa stoliczkai	Gansu Fisheries Research Institute	G0169	China	Gansu	Lanzhou	Yongchang	N 36°18.697'	E 103°25.040'	H 2066m	MT271556
Triplophysa stoliczkai-087	Triplophysa stoliczkai	Gansu Fisheries Research Institute	G0170	China	Gansu	Lanzhou	Yongchang	N 36°18.697'	E 103°25.040'	H 2066m	MT271557
Triplophysa stoliczkai-088	Triplophysa stoliczkai	Gansu Fisheries Research Institute	G0171	China	Gansu	Lanzhou	Yongchang	N 36°18.697'	E 103°25.040'	H 2066m	MT271544
Triplophysa stoliczkai-013	Triplophysa stoliczkai	Gansu Fisheries Research Institute	G0172	China	Gansu	Jinchang	Yongchang	N 38°19.887'	E 102° 1.632'	H 1827m	MT271559
Triplophysa stoliczkai-017	Triplophysa stoliczkai	Gansu Fisheries Research Institute	G0173	China	Gansu	Lanzhou	Yuzhong	N 35°51.857'	E 104°00.827'	H 2094m	MT271544
Triplophysa stoliczkai-053	Triplophysa stoliczkai	Gansu Fisheries Research Institute	G0174	China	Gansu	Qingyang	Zhenyuan	N 35°36.789'	E 107°28.571'	H 1052m	MT271544
Triplophysa stoliczkai-117	Triplophysa stoliczkai	Gansu Fisheries Research Institute	G0175	China	Gansu	Qingyang	Zhenyuan	N 35°36.789'	E 107°28.571'	H 1052m	MT271544
Triplophysa stoliczkai-002	Triplophysa stoliczkai	Gansu Fisheries Research Institute	G0176	China	Gansu	Gannan	Zhouqu	N 33°46.995'	E 104°21.095'	H 1938m	MT271559
Triplophysa stoliczkai-003	Triplophysa stoliczkai	Gansu Fisheries Research Institute	G0177	China	Gansu	Gannan	Zhouqu	N 33°46.995'	E 104°21.095'	H 1938m	MT271544
Triplophysa stoliczkai-004	Triplophysa stoliczkai	Gansu Fisheries Research Institute	G0178	China	Gansu	Gannan	Zhouqu	N 33°46.995'	E 104°21.095'	H 1938m	MT271544
Triplophysa stoliczkai-005	Triplophysa stoliczkai	Gansu Fisheries Research Institute	G0179	China	Gansu	Gannan	Zhouqu	N 33°46.995'	E 104°21.095'	H 1938m	MT271558
Triplophysa stoliczkai-006	Triplophysa stoliczkai	Gansu Fisheries Research Institute	G0180	China	Gansu	Gannan	Zhouqu	N 33°49.734'	E 104°02.355'	H 2051m	MT271558
Triplophysa stoliczkai-081	Triplophysa stoliczkai	Gansu Fisheries Research Institute	G0181	China	Gansu	Pingliang	Zhuanglang	N 35°19.414'	E 105°57.493'	H 1657m	MT271544
Triplophysa stoliczkai-082	Triplophysa stoliczkai	Gansu Fisheries Research Institute	G0182	China	Gansu	Pingliang	Zhuanglang	N 35°19.414'	E 105°57.493'	H 1657m	MT271558
Triplophysa stoliczkai-083	Triplophysa stoliczkai	Gansu Fisheries Research Institute	G0183	China	Gansu	Pingliang	Zhuanglang	N 35°19.414'	E 105°57.493'	H 1657m	MT271544
Triplophysa stoliczkai-119	Triplophysa stoliczkai	Gansu Fisheries Research Institute	G0184	China	Gansu	Pingliang	Zhuanglang	N 35°19.414'	E 105°57.493'	H 1657m	MT271544
Triplophysa strauchii-001	Triplophysa strauchii	Gansu Fisheries Research Institute	GS0269	China	Gansu	Zhangye	Linze	N 39°08.376'	E 100°23.839'	H 1412m	MT271567
Triplophysa strauchii-002	Triplophysa strauchii	Gansu Fisheries Research Institute	GS0270	China	Gansu	Zhangye	Linze	N 39°08.376'	E 100°23.839'	H 1412m	MT271567
Triplophysa strauchii-003	Triplophysa strauchii	Gansu Fisheries Research Institute	GS0271	China	Gansu	Zhangye	Linze	N 39°08.376'	E 100°23.839'	H 1412m	MT271567
Triplophysa strauchii-004	Triplophysa strauchii	Gansu Fisheries Research Institute	GS0272	China	Gansu	Zhangye	Linze	N 39°08.376'	E 100°23.839'	H 1412m	MT271567
Triplophysa strauchii-005	Triplophysa strauchii	Gansu Fisheries Research Institute	GS0273	China	Gansu	Zhangye	Linze	N 39°08.376'	E 100°23.839'	H 1412m	MT271567
Triplophysa strauchii-006	Triplophysa strauchii	Gansu Fisheries Research Institute	GS0274	China	Gansu	Zhangye	Linze	N 39°08.376'	E 100°23.839'	H 1412m	MT271567
Triplophysa strauchii-007	Triplophysa strauchii	Gansu Fisheries Research Institute	GS0275	China	Gansu	Zhangye	Linze	N 39°08.376'	E 100°23.839'	H 1412m	MT271567
Triplophysa strauchii-008	Triplophysa strauchii	Gansu Fisheries Research Institute	GS0276	China	Gansu	Zhangye	Sunan	N 38°43.545'	E 100° 4.871'	H 2856m	MT271568
Triplophysa strauchii-009	Triplophysa strauchii	Gansu Fisheries Research Institute	GS0277	China	Gansu	Zhangye	Sunan	N 38°43.545'	E 100° 4.871'	H 2856m	MT271568
Triplophysa strauchii-010	Triplophysa strauchii	Gansu Fisheries Research Institute	GS0278	China	Gansu	Zhangye	Sunan	N 38°43.545'	E 100° 4.871'	H 2856m	MT271568
Triplophysa strauchii-011	Triplophysa strauchii	Gansu Fisheries Research Institute	GS0279	China	Gansu	Zhangye	Sunan	N 38°43.545'	E 100° 4.871'	H 2856m	MT271568
Triplophysa tenuis-089	Triplophysa tenuis	Gansu Fisheries Research Institute	GS0531	China	Gansu	Zhangye	Gaotai	N 39°20.982'	E 99°55.592'	H 1357m	MT271579
Triplophysa tenuis-046	Triplophysa tenuis	Gansu Fisheries Research Institute	GS0488	China	Gansu	Zhangye	Linze	N 39°08.376'	E 100°23.839'	H 1412m	MT271569
Triplophysa tenuis-095	Triplophysa tenuis	Gansu Fisheries Research Institute	GS0537	China	Gansu	Zhangye	Linze	N 39°08.376'	E 100°23.839'	H 1412m	MT271569
Triplophysa tenuis-097	Triplophysa tenuis	Gansu Fisheries Research Institute	GS0539	China	Gansu	Zhangye	Linze	N 39°08.376'	E 100°23.839'	H 1412m	MT271569
Triplophysa tenuis-034	Triplophysa tenuis	Gansu Fisheries Research Institute	GS0476	China	Gansu	Jiuquan	Subei	N 39°32.795'	E 94°50.900'	H 2056m	MT271569
Triplophysa tenuis-035	Triplophysa tenuis	Gansu Fisheries Research Institute	GS0477	China	Gansu	Jiuquan	Subei	N 39°32.795'	E 94°50.900'	H 2056m	MT271569
Triplophysa tenuis-036	Triplophysa tenuis	Gansu Fisheries Research Institute	GS0478	China	Gansu	Jiuquan	Subei	N 39°32.795'	E 94°50.900'	H 2056m	MT271569
Triplophysa tenuis-037	Triplophysa tenuis	Gansu Fisheries Research Institute	GS0479	China	Gansu	Jiuquan	Subei	N 39°32.795'	E 94°50.900'	H 2056m	MT271569
Triplophysa tenuis-038	Triplophysa tenuis	Gansu Fisheries Research Institute	GS0480	China	Gansu	Jiuquan	Subei	N 39°32.795'	E 94°50.900'	H 2056m	MT271569
Triplophysa tenuis-039	Triplophysa tenuis	Gansu Fisheries Research Institute	GS0481	China	Gansu	Jiuquan	Subei	N 39°32.795'	E 94°50.900'	H 2056m	MT271569
Triplophysa tenuis-040	Triplophysa tenuis	Gansu Fisheries Research Institute	GS0482	China	Gansu	Jiuquan	Subei	N 39°32.795'	E 94°50.900'	H 2056m	MT271570
Triplophysa tenuis-041	Triplophysa tenuis	Gansu Fisheries Research Institute	GS0483	China	Gansu	Jiuquan	Subei	N 39°32.795'	E 94°50.900'	H 2056m	MT271569
Triplophysa tenuis-042	Triplophysa tenuis	Gansu Fisheries Research Institute	GS0484	China	Gansu	Jiuquan	Subei	N 39°32.795'	E 94°50.900'	H 2056m	MT271571
Triplophysa tenuis-043	Triplophysa tenuis	Gansu Fisheries Research Institute	GS0485	China	Gansu	Jiuquan	Subei	N 39°32.795'	E 94°50.900'	H 2056m	MT271571
Triplophysa tenuis-044	Triplophysa tenuis	Gansu Fisheries Research Institute	GS0486	China	Gansu	Jiuquan	Subei	N 39°32.795'	E 94°50.900'	H 2056m	MT271571
Triplophysa tenuis-045	Triplophysa tenuis	Gansu Fisheries Research Institute	GS0487	China	Gansu	Jiuquan	Subei	N 39°32.795'	E 94°50.900'	H 2056m	MT271571
Triplophysa tenuis-094	Triplophysa tenuis	Gansu Fisheries Research Institute	GS0536	China	Gansu	Jiuquan	Subei	N 39°32.795'	E 94°50.900'	H 2056m	MT271571
Triplophysa tenuis-001	Triplophysa tenuis	Gansu Fisheries Research Institute	GS0443	China	Gansu	Jiuquan	Suzhou	N 39°46.304'	E 98°37.727'	H 1403m	MT271569
Triplophysa tenuis-002	Triplophysa tenuis	Gansu Fisheries Research Institute	GS0444	China	Gansu	Jiuquan	Suzhou	N 39°46.304'	E 98°37.727'	H 1403m	MT271569
Triplophysa tenuis-003	Triplophysa tenuis	Gansu Fisheries Research Institute	GS0445	China	Gansu	Jiuquan	Suzhou	N 39°46.304'	E 98°37.727'	H 1403m	MT271571
Triplophysa tenuis-004	Triplophysa tenuis	Gansu Fisheries Research Institute	GS0446	China	Gansu	Jiuquan	Suzhou	N 39°46.304'	E 98°37.727'	H 1403m	MT271571
Triplophysa tenuis-005	Triplophysa tenuis	Gansu Fisheries Research Institute	GS0447	China	Gansu	Jiuquan	Suzhou	N 39°46.304'	E 98°37.727'	H 1403m	MT271571
Triplophysa tenuis-006	Triplophysa tenuis	Gansu Fisheries Research Institute	GS0448	China	Gansu	Jiuquan	Suzhou	N 39°46.304'	E 98°37.727'	H 1403m	MT271571
Triplophysa tenuis-007	Triplophysa tenuis	Gansu Fisheries Research Institute	GS0449	China	Gansu	Jiuquan	Suzhou	N 39°46.304'	E 98°37.727'	H 1403m	MT271569
Triplophysa tenuis-008	Triplophysa tenuis	Gansu Fisheries Research Institute	GS0450	China	Gansu	Jiuquan	Suzhou	N 39°46.304'	E 98°37.727'	H 1403m	MT271569
Triplophysa tenuis-009	Triplophysa tenuis	Gansu Fisheries Research Institute	GS0451	China	Gansu	Jiuquan	Suzhou	N 39°46.304'	E 98°37.727'	H 1403m	MT271569
Triplophysa tenuis-010	Triplophysa tenuis	Gansu Fisheries Research Institute	GS0452	China	Gansu	Jiuquan	Suzhou	N 39°46.304'	E 98°37.727'	H 1403m	MT271569
Triplophysa tenuis-011	Triplophysa tenuis	Gansu Fisheries Research Institute	GS0453	China	Gansu	Jiuquan	Suzhou	N 39°46.304'	E 98°37.727'	H 1403m	MT271569
Triplophysa tenuis-012	Triplophysa tenuis	Gansu Fisheries Research Institute	GS0454	China	Gansu	Jiuquan	Suzhou	N 39°46.304'	E 98°37.727'	H 1403m	MT271569
Triplophysa tenuis-013	Triplophysa tenuis	Gansu Fisheries Research Institute	GS0455	China	Gansu	Jiuquan	Suzhou	N 39°46.304'	E 98°37.727'	H 1403m	MT271569
Triplophysa tenuis-014	Triplophysa tenuis	Gansu Fisheries Research Institute	GS0456	China	Gansu	Jiuquan	Suzhou	N 39°46.304'	E 98°37.727'	H 1403m	MT271569
Triplophysa tenuis-015	Triplophysa tenuis	Gansu Fisheries Research Institute	GS0457	China	Gansu	Jiuquan	Suzhou	N 39°46.304'	E 98°37.727'	H 1403m	MT271569
Triplophysa tenuis-016	Triplophysa tenuis	Gansu Fisheries Research Institute	GS0458	China	Gansu	Jiuquan	Suzhou	N 39°46.304'	E 98°37.727'	H 1403m	MT271569
Triplophysa tenuis-017	Triplophysa tenuis	Gansu Fisheries Research Institute	GS0459	China	Gansu	Jiuquan	Suzhou	N 39°46.304'	E 98°37.727'	H 1403m	MT271569
Triplophysa tenuis-018	Triplophysa tenuis	Gansu Fisheries Research Institute	GS0460	China	Gansu	Jiuquan	Suzhou	N 39°46.304'	E 98°37.727'	H 1403m	MT271569
Triplophysa tenuis-019	Triplophysa tenuis	Gansu Fisheries Research Institute	GS0461	China	Gansu	Jiuquan	Suzhou	N 39°46.304'	E 98°37.727'	H 1403m	MT271569
Triplophysa tenuis-020	Triplophysa tenuis	Gansu Fisheries Research Institute	GS0462	China	Gansu	Jiuquan	Suzhou	N 39°46.304'	E 98°37.727'	H 1403m	MT271569
Triplophysa tenuis-021	Triplophysa tenuis	Gansu Fisheries Research Institute	GS0463	China	Gansu	Jiuquan	Suzhou	N 39°46.304'	E 98°37.727'	H 1403m	MT271569
Triplophysa tenuis-022	Triplophysa tenuis	Gansu Fisheries Research Institute	GS0464	China	Gansu	Jiuquan	Suzhou	N 39°46.304'	E 98°37.727'	H 1403m	MT271569
Triplophysa tenuis-023	Triplophysa tenuis	Gansu Fisheries Research Institute	GS0465	China	Gansu	Jiuquan	Suzhou	N 39°46.304'	E 98°37.727'	H 1403m	MT271569
Triplophysa tenuis-024	Triplophysa tenuis	Gansu Fisheries Research Institute	GS0466	China	Gansu	Jiuquan	Suzhou	N 39°46.304'	E 98°37.727'	H 1403m	MT271569
Triplophysa tenuis-025	Triplophysa tenuis	Gansu Fisheries Research Institute	GS0467	China	Gansu	Jiuquan	Suzhou	N 39°46.304'	E 98°37.727'	H 1403m	MT271569
Triplophysa tenuis-026	Triplophysa tenuis	Gansu Fisheries Research Institute	GS0468	China	Gansu	Jiuquan	Suzhou	N 39°46.304'	E 98°37.727'	H 1403m	MT271569
Triplophysa tenuis-027	Triplophysa tenuis	Gansu Fisheries Research Institute	GS0469	China	Gansu	Jiuquan	Suzhou	N 39°46.304'	E 98°37.727'	H 1403m	MT271569
Triplophysa tenuis-028	Triplophysa tenuis	Gansu Fisheries Research Institute	GS0470	China	Gansu	Jiuquan	Suzhou	N 39°46.304'	E 98°37.727'	H 1403m	MT271569
Triplophysa tenuis-029	Triplophysa tenuis	Gansu Fisheries Research Institute	GS0471	China	Gansu	Jiuquan	Suzhou	N 39°46.304'	E 98°37.727'	H 1403m	MT271569
Triplophysa tenuis-030	Triplophysa tenuis	Gansu Fisheries Research Institute	GS0472	China	Gansu	Jiuquan	Suzhou	N 39°46.304'	E 98°37.727'	H 1403m	MT271569
Triplophysa tenuis-031	Triplophysa tenuis	Gansu Fisheries Research Institute	GS0473	China	Gansu	Jiuquan	Suzhou	N 39°46.304'	E 98°37.727'	H 1403m	MT271569
Triplophysa tenuis-032	Triplophysa tenuis	Gansu Fisheries Research Institute	GS0474	China	Gansu	Jiuquan	Suzhou	N 39°46.304'	E 98°37.727'	H 1403m	MT271569
Triplophysa tenuis-033	Triplophysa tenuis	Gansu Fisheries Research Institute	GS0475	China	Gansu	Jiuquan	Suzhou	N 39°46.304'	E 98°37.727'	H 1403m	MT271569
Triplophysa tenuis-077	Triplophysa tenuis	Gansu Fisheries Research Institute	GS0519	China	Gansu	Jiuquan	Suzhou	N 39°46.304'	E 98°37.727'	H 1403m	MT271569
Triplophysa tenuis-078	Triplophysa tenuis	Gansu Fisheries Research Institute	GS0520	China	Gansu	Jiuquan	Suzhou	N 39°46.304'	E 98°37.727'	H 1403m	MT271569
Triplophysa tenuis-079	Triplophysa tenuis	Gansu Fisheries Research Institute	GS0521	China	Gansu	Jiuquan	Suzhou	N 39°46.304'	E 98°37.727'	H 1403m	MT271569
Triplophysa tenuis-080	Triplophysa tenuis	Gansu Fisheries Research Institute	GS0522	China	Gansu	Jiuquan	Suzhou	N 39°46.304'	E 98°37.727'	H 1403m	MT271569
Triplophysa tenuis-081	Triplophysa tenuis	Gansu Fisheries Research Institute	GS0523	China	Gansu	Jiuquan	Suzhou	N 39°46.304'	E 98°37.727'	H 1403m	MT271569
Triplophysa tenuis-082	Triplophysa tenuis	Gansu Fisheries Research Institute	GS0524	China	Gansu	Jiuquan	Suzhou	N 39°46.304'	E 98°37.727'	H 1403m	MT271569
Triplophysa tenuis-083	Triplophysa tenuis	Gansu Fisheries Research Institute	GS0525	China	Gansu	Jiuquan	Suzhou	N 39°46.304'	E 98°37.727'	H 1403m	MT271569
Triplophysa tenuis-084	Triplophysa tenuis	Gansu Fisheries Research Institute	GS0526	China	Gansu	Jiuquan	Suzhou	N 39°46.304'	E 98°37.727'	H 1403m	MT271569
Triplophysa tenuis-088	Triplophysa tenuis	Gansu Fisheries Research Institute	GS0530	China	Gansu	Jiuquan	Suzhou	N 39°46.304'	E 98°37.727'	H 1403m	MT271578
Triplophysa tenuis-090	Triplophysa tenuis	Gansu Fisheries Research Institute	GS0532	China	Gansu	Jiuquan	Suzhou	N 39°46.304'	E 98°37.727'	H 1403m	MT271569
Triplophysa tenuis-091	Triplophysa tenuis	Gansu Fisheries Research Institute	GS0533	China	Gansu	Jiuquan	Suzhou	N 39°46.304'	E 98°37.727'	H 1403m	MT271569
Triplophysa tenuis-093	Triplophysa tenuis	Gansu Fisheries Research Institute	GS0535	China	Gansu	Jiuquan	Suzhou	N 39°46.304'	E 98°37.727'	H 1403m	MT271569
Triplophysa tenuis-085	Triplophysa tenuis	Gansu Fisheries Research Institute	GS0527	China	Gansu	Jiuquan	Suzhou	N 39°46.425'	E 98°38.643'	H 1398m	MT271569
Triplophysa tenuis-086	Triplophysa tenuis	Gansu Fisheries Research Institute	GS0528	China	Gansu	Jiuquan	Suzhou	N 39°46.425'	E 98°38.643'	H 1398m	MT271569
Triplophysa tenuis-087	Triplophysa tenuis	Gansu Fisheries Research Institute	GS0529	China	Gansu	Jiuquan	Suzhou	N 39°46.425'	E 98°38.643'	H 1398m	MT271569
Triplophysa tenuis-047	Triplophysa tenuis	Gansu Fisheries Research Institute	GS0489	China	Gansu	Jiuquan	Yumen	N 39°52.098'	E 96°44.983'	H 2054m	MT271569
Triplophysa tenuis-048	Triplophysa tenuis	Gansu Fisheries Research Institute	GS0490	China	Gansu	Jiuquan	Yumen	N 39°52.098'	E 96°44.983'	H 2054m	MT271569
Triplophysa tenuis-049	Triplophysa tenuis	Gansu Fisheries Research Institute	GS0491	China	Gansu	Jiuquan	Yumen	N 39°52.098'	E 96°44.983'	H 2054m	MT271572
Triplophysa tenuis-050	Triplophysa tenuis	Gansu Fisheries Research Institute	GS0492	China	Gansu	Jiuquan	Yumen	N 39°52.098'	E 96°44.983'	H 2054m	MT271572
Triplophysa tenuis-051	Triplophysa tenuis	Gansu Fisheries Research Institute	GS0493	China	Gansu	Jiuquan	Yumen	N 39°52.098'	E 96°44.983'	H 2054m	MT271569
Triplophysa tenuis-052	Triplophysa tenuis	Gansu Fisheries Research Institute	GS0494	China	Gansu	Jiuquan	Yumen	N 39°52.098'	E 96°44.983'	H 2054m	MT271569
Triplophysa tenuis-053	Triplophysa tenuis	Gansu Fisheries Research Institute	GS0495	China	Gansu	Jiuquan	Yumen	N 39°52.098'	E 96°44.983'	H 2054m	MT271571
Triplophysa tenuis-054	Triplophysa tenuis	Gansu Fisheries Research Institute	GS0496	China	Gansu	Jiuquan	Yumen	N 39°52.098'	E 96°44.983'	H 2054m	MT271569
Triplophysa tenuis-055	Triplophysa tenuis	Gansu Fisheries Research Institute	GS0497	China	Gansu	Jiuquan	Yumen	N 39°52.098'	E 96°44.983'	H 2054m	MT271569
Triplophysa tenuis-056	Triplophysa tenuis	Gansu Fisheries Research Institute	GS0498	China	Gansu	Jiuquan	Yumen	N 39°52.098'	E 96°44.983'	H 2054m	MT271569
Triplophysa tenuis-057	Triplophysa tenuis	Gansu Fisheries Research Institute	GS0499	China	Gansu	Jiuquan	Yumen	N 39°52.098'	E 96°44.983'	H 2054m	MT271577
Triplophysa tenuis-058	Triplophysa tenuis	Gansu Fisheries Research Institute	GS0500	China	Gansu	Jiuquan	Yumen	N 39°52.098'	E 96°44.983'	H 2054m	MT271569
Triplophysa tenuis-059	Triplophysa tenuis	Gansu Fisheries Research Institute	GS0501	China	Gansu	Jiuquan	Yumen	N 39°52.098'	E 96°44.983'	H 2054m	MT271569
Triplophysa tenuis-060	Triplophysa tenuis	Gansu Fisheries Research Institute	GS0502	China	Gansu	Jiuquan	Yumen	N 39°52.098'	E 96°44.983'	H 2054m	MT271569
Triplophysa tenuis-061	Triplophysa tenuis	Gansu Fisheries Research Institute	GS0503	China	Gansu	Jiuquan	Yumen	N 39°52.098'	E 96°44.983'	H 2054m	MT271569
Triplophysa tenuis-062	Triplophysa tenuis	Gansu Fisheries Research Institute	GS0504	China	Gansu	Jiuquan	Yumen	N 39°52.098'	E 96°44.983'	H 2054m	MT271569
Triplophysa tenuis-063	Triplophysa tenuis	Gansu Fisheries Research Institute	GS0505	China	Gansu	Jiuquan	Yumen	N 39°52.098'	E 96°44.983'	H 2054m	MT271569
Triplophysa tenuis-064	Triplophysa tenuis	Gansu Fisheries Research Institute	GS0506	China	Gansu	Jiuquan	Yumen	N 39°52.098'	E 96°44.983'	H 2054m	MT271569
Triplophysa tenuis-065	Triplophysa tenuis	Gansu Fisheries Research Institute	GS0507	China	Gansu	Jiuquan	Yumen	N 39°52.098'	E 96°44.983'	H 2054m	MT271569
Triplophysa tenuis-066	Triplophysa tenuis	Gansu Fisheries Research Institute	GS0508	China	Gansu	Jiuquan	Yumen	N 39°52.098'	E 96°44.983'	H 2054m	MT271569
Triplophysa tenuis-067	Triplophysa tenuis	Gansu Fisheries Research Institute	GS0509	China	Gansu	Jiuquan	Yumen	N 39°52.098'	E 96°44.983'	H 2054m	MT271569
Triplophysa tenuis-068	Triplophysa tenuis	Gansu Fisheries Research Institute	GS0510	China	Gansu	Jiuquan	Yumen	N 39°52.098'	E 96°44.983'	H 2054m	MT271569
Triplophysa tenuis-069	Triplophysa tenuis	Gansu Fisheries Research Institute	GS0511	China	Gansu	Jiuquan	Yumen	N 39°52.098'	E 96°44.983'	H 2054m	MT271569
Triplophysa tenuis-070	Triplophysa tenuis	Gansu Fisheries Research Institute	GS0512	China	Gansu	Jiuquan	Yumen	N 39°52.098'	E 96°44.983'	H 2054m	MT271569
Triplophysa tenuis-071	Triplophysa tenuis	Gansu Fisheries Research Institute	GS0513	China	Gansu	Jiuquan	Yumen	N 39°52.098'	E 96°44.983'	H 2054m	MT271573
Triplophysa tenuis-072	Triplophysa tenuis	Gansu Fisheries Research Institute	GS0514	China	Gansu	Jiuquan	Yumen	N 39°52.098'	E 96°44.983'	H 2054m	MT271569
Triplophysa tenuis-073	Triplophysa tenuis	Gansu Fisheries Research Institute	GS0515	China	Gansu	Jiuquan	Yumen	N 39°52.098'	E 96°44.983'	H 2054m	MT271569
Triplophysa tenuis-074	Triplophysa tenuis	Gansu Fisheries Research Institute	GS0516	China	Gansu	Jiuquan	Yumen	N 39°52.098'	E 96°44.983'	H 2054m	MT271576
Triplophysa tenuis-075	Triplophysa tenuis	Gansu Fisheries Research Institute	GS0517	China	Gansu	Jiuquan	Yumen	N 39°52.098'	E 96°44.983'	H 2054m	MT271575
Triplophysa tenuis-076	Triplophysa tenuis	Gansu Fisheries Research Institute	GS0518	China	Gansu	Jiuquan	Yumen	N 39°52.098'	E 96°44.983'	H 2054m	MT271569
Triplophysa tenuis-092	Triplophysa tenuis	Gansu Fisheries Research Institute	GS0534	China	Gansu	Jiuquan	Yumen	N 39°52.098'	E 96°44.983'	H 2054m	MT271574
Triplophysa tenuis-096	Triplophysa tenuis	Gansu Fisheries Research Institute	GS0538	China	Gansu	Jiuquan	Yumen	N 39°52.098'	E 96°44.983'	H 2054m	MT271574
Triplophysa wuweiensis-001	Triplophysa wuweiensis	Gansu Fisheries Research Institute	GS0375	China	Gansu	Jinchang	Yongchang	N 38°19.887'	E 102° 1.632'	H 1827m	MT271581
Triplophysa wuweiensis-002	Triplophysa wuweiensis	Gansu Fisheries Research Institute	GS0376	China	Gansu	Jinchang	Yongchang	N 38°19.887'	E 102° 1.632'	H 1827m	MT271581
Triplophysa wuweiensis-003	Triplophysa wuweiensis	Gansu Fisheries Research Institute	GS0377	China	Gansu	Jinchang	Yongchang	N 38°19.887'	E 102° 1.632'	H 1827m	MT271581
Triplophysa wuweiensis-004	Triplophysa wuweiensis	Gansu Fisheries Research Institute	GS0378	China	Gansu	Jinchang	Yongchang	N 38°19.887'	E 102° 1.632'	H 1827m	MT271581
Triplophysa wuweiensis-005	Triplophysa wuweiensis	Gansu Fisheries Research Institute	GS0379	China	Gansu	Jinchang	Yongchang	N 38°19.887'	E 102° 1.632'	H 1827m	MT271581
Triplophysa wuweiensis-006	Triplophysa wuweiensis	Gansu Fisheries Research Institute	GS0380	China	Gansu	Jinchang	Yongchang	N 38°19.887'	E 102° 1.632'	H 1827m	MT271581
Triplophysa wuweiensis-007	Triplophysa wuweiensis	Gansu Fisheries Research Institute	GS0381	China	Gansu	Jinchang	Yongchang	N 38°19.887'	E 102° 1.632'	H 1827m	MT271580
Triplophysa wuweiensis-008	Triplophysa wuweiensis	Gansu Fisheries Research Institute	GS0382	China	Gansu	Jinchang	Yongchang	N 38°19.887'	E 102° 1.632'	H 1827m	MT271581
Triplophysa wuweiensis-009	Triplophysa wuweiensis	Gansu Fisheries Research Institute	GS0383	China	Gansu	Jinchang	Yongchang	N 38°19.887'	E 102° 1.632'	H 1827m	MT271581
Triplophysa wuweiensis-010	Triplophysa wuweiensis	Gansu Fisheries Research Institute	GS0384	China	Gansu	Jinchang	Yongchang	N 38°19.887'	E 102° 1.632'	H 1827m	MT271581
Triplophysa wuweiensis-011	Triplophysa wuweiensis	Gansu Fisheries Research Institute	GS0385	China	Gansu	Jinchang	Yongchang	N 38°19.887'	E 102° 1.632'	H 1827m	MT271581
Triplophysa wuweiensis-012	Triplophysa wuweiensis	Gansu Fisheries Research Institute	GS0386	China	Gansu	Jinchang	Yongchang	N 38°19.887'	E 102° 1.632'	H 1827m	MT271581
Triplophysa wuweiensis-013	Triplophysa wuweiensis	Gansu Fisheries Research Institute	GS0387	China	Gansu	Jinchang	Yongchang	N 38°19.887'	E 102° 1.632'	H 1827m	MT271581
Triplophysa wuweiensis-014	Triplophysa wuweiensis	Gansu Fisheries Research Institute	GS0388	China	Gansu	Jinchang	Yongchang	N 38°19.887'	E 102° 1.632'	H 1827m	MT271581
Triplophysa wuweiensis-015	Triplophysa wuweiensis	Gansu Fisheries Research Institute	GS0389	China	Gansu	Jinchang	Yongchang	N 38°19.887'	E 102° 1.632'	H 1827m	MT271582
Triplophysa wuweiensis-016	Triplophysa wuweiensis	Gansu Fisheries Research Institute	GS0390	China	Gansu	Jinchang	Yongchang	N 38°19.887'	E 102° 1.632'	H 1827m	MT271582
Triplophysa wuweiensis-017	Triplophysa wuweiensis	Gansu Fisheries Research Institute	GS0391	China	Gansu	Jinchang	Yongchang	N 38°19.887'	E 102° 1.632'	H 1827m	MT271582
